# Supplementary material for: A fast stratospheric chemistry solver: the E4CHEM submodel for the atmospheric chemistry global circulation model EMAC
Source: Copernicus journal article supplement (doi:10.5194/gmd-3-321-2010), 2010-06-22

# Supplemental Material: Additional Figures

## Part 2: EMAC simulations S-E4CHEM, S-MECCA(E4CHEM) and S-MECCA(EVAL)

A. J. G. Baumgaertner, P. Jöckel, B. Steil, H. Tost & R. Sander

Correspondance to: A. J. G. Baumgaertner  
Air Chemistry Department, Max Planck Institute for Chemistry  
PO Box 3060, 55020 Mainz, Germany  
`work@andreas-baumgaertner.net`

This document is part of the electronic supplement of our article “A fast stratospheric chemistry solver: The E4CHEM submodel for the atmospheric chemistry global circulation model EMAC” in Geosci. Model Dev. Disc. (2010), available at: <http://www.geosci-model-dev-discuss.net>

Date: 2009/12/15

## Contents

|           |                                            |           |
|-----------|--------------------------------------------|-----------|
| <b>1</b>  | <b>Species: ClONO<sub>2</sub></b>          | <b>3</b>  |
| <b>2</b>  | <b>Species: ClO</b>                        | <b>9</b>  |
| <b>3</b>  | <b>Species: ClOX</b>                       | <b>15</b> |
| <b>4</b>  | <b>Species: CO</b>                         | <b>21</b> |
| <b>5</b>  | <b>Species: H<sub>2</sub>O</b>             | <b>27</b> |
| <b>6</b>  | <b>Species: HNO<sub>3</sub></b>            | <b>33</b> |
| <b>7</b>  | <b>Species: HOCl</b>                       | <b>39</b> |
| <b>8</b>  | <b>Species: N<sub>2</sub>O<sub>5</sub></b> | <b>45</b> |
| <b>9</b>  | <b>Species: N<sub>2</sub>O</b>             | <b>51</b> |
| <b>10</b> | <b>Species: NO<sub>x</sub></b>             | <b>57</b> |
| <b>11</b> | <b>Species: O<sub>3</sub></b>              | <b>63</b> |
| <b>12</b> | <b>Total column ozone</b>                  | <b>69</b> |

# 1 Species: ClONO<sub>2</sub>

S-E4CHEM

S-MECCA(E4CHEM)  
zonal mean ClNO<sub>3</sub> at 100 hPa, [pptv]

S-MECCA(EVAL)

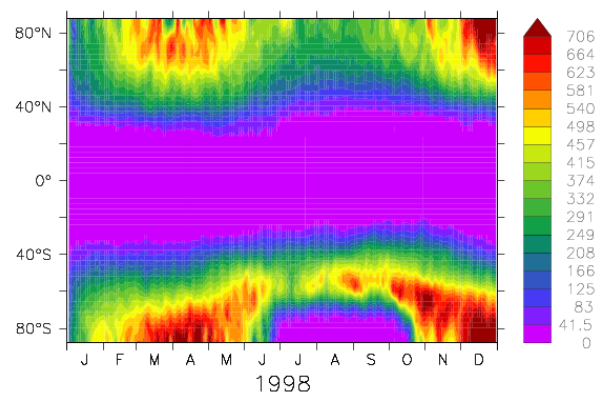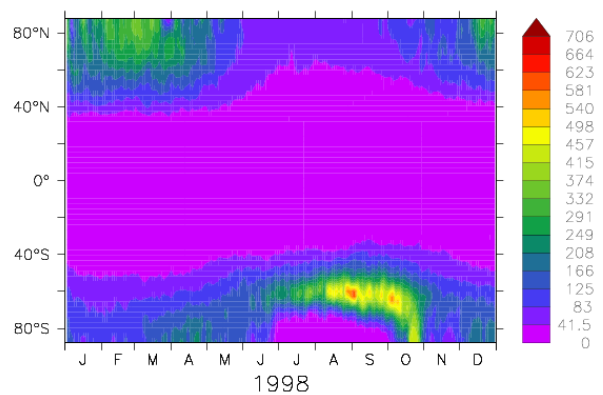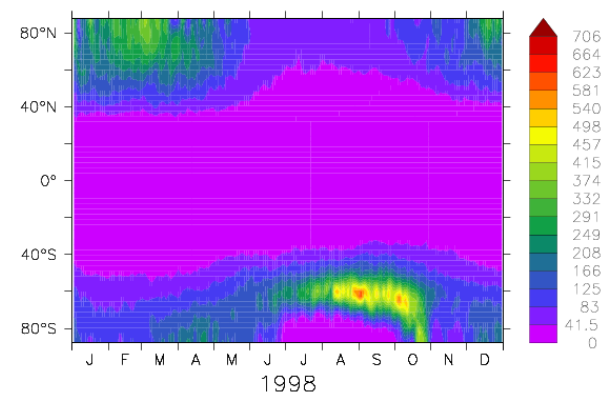zonal mean ClONO<sub>2</sub> at 50 hPa, [pptv]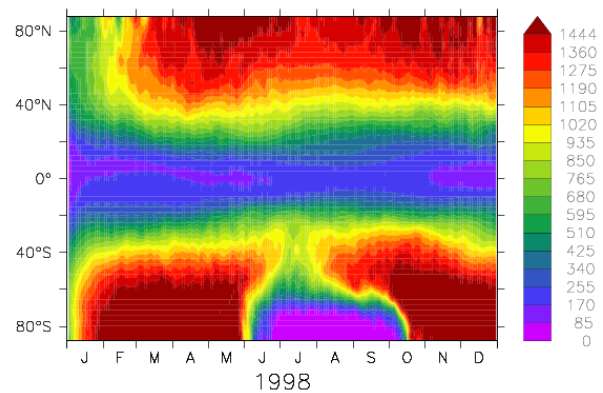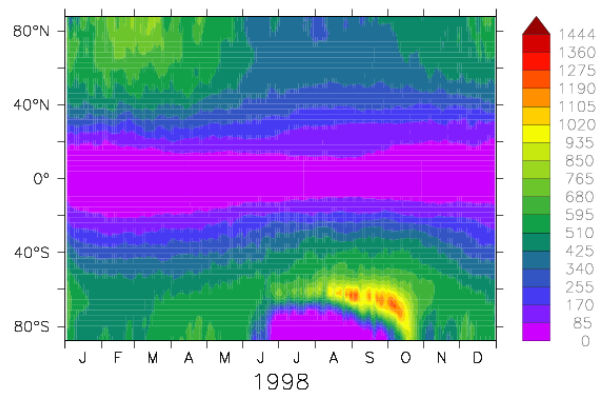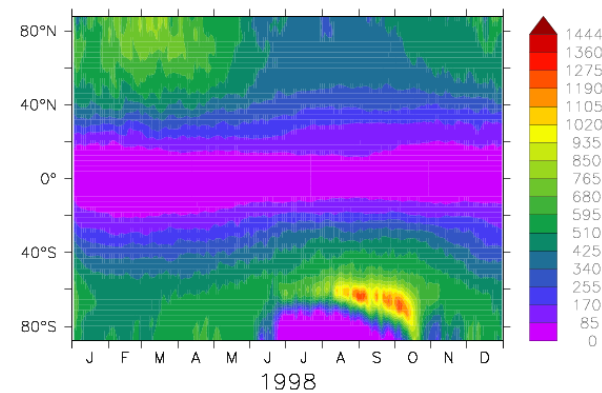

S-E4CHEM

S-MECCA(E4CHEM)  
zonal mean ClNO<sub>3</sub> at 10 hPa, [pptv]

S-MECCA(EVAL)

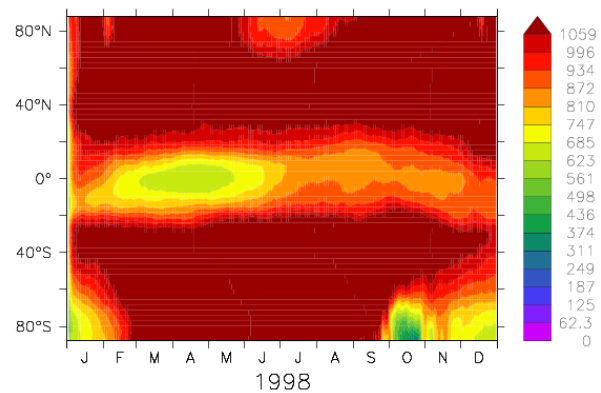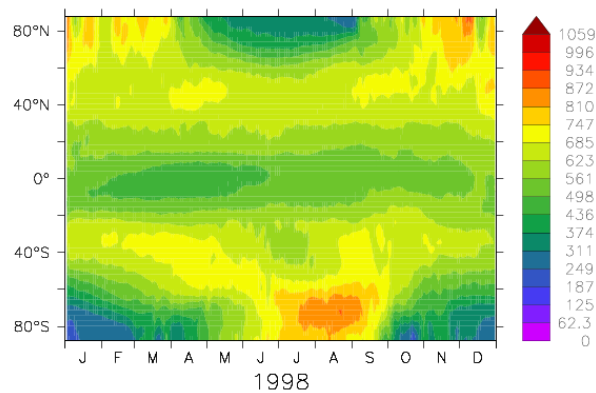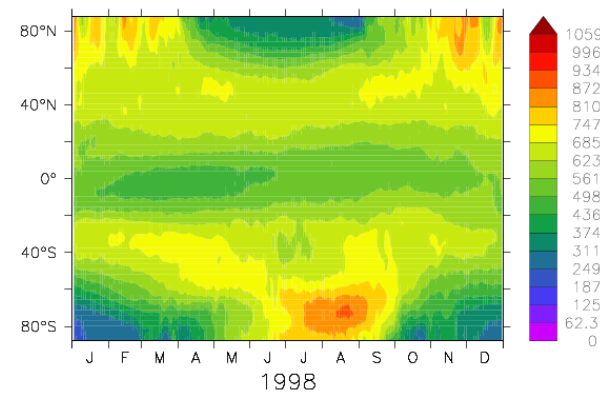zonal mean ClNO<sub>3</sub> at 1 hPa, [pptv]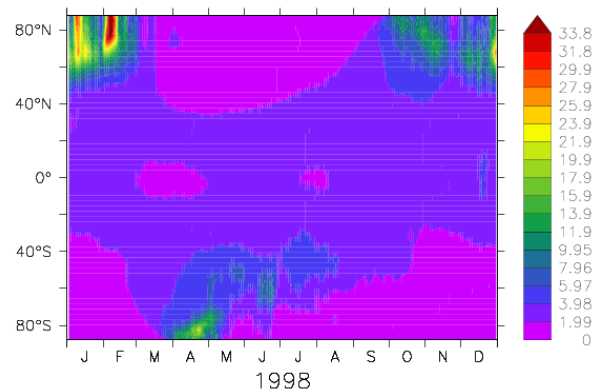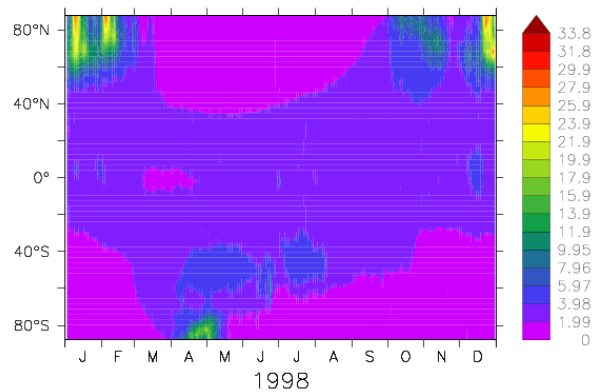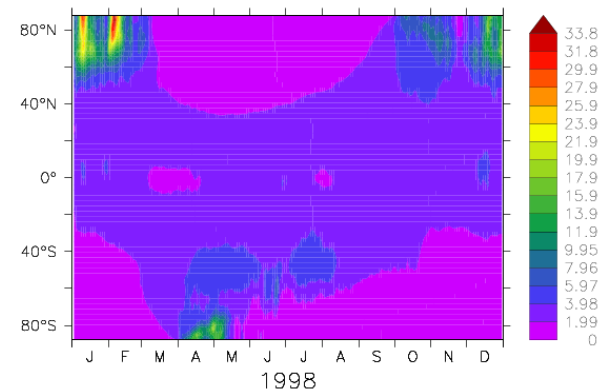



S-E4CHEM

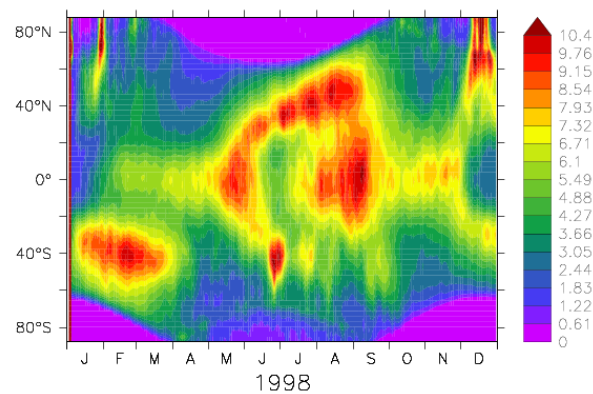S-MECCA(E4CHEM)  
zonal mean  $\text{ClNO}_3$  at 0.1 hPa, [ppqv]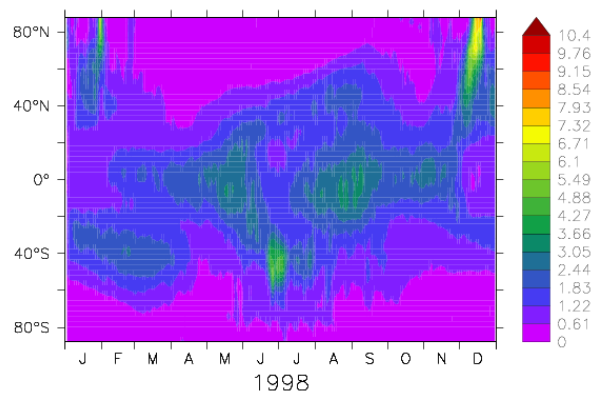

S-MECCA(EVAL)

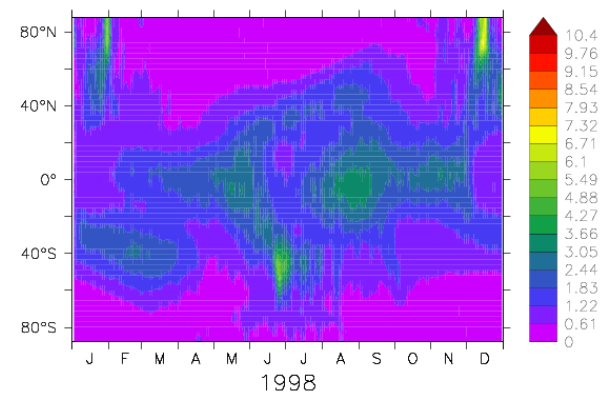zonal mean  $\text{ClNO}_3$  at t=1-Jan-1998:31-Dec-1998, [pptv]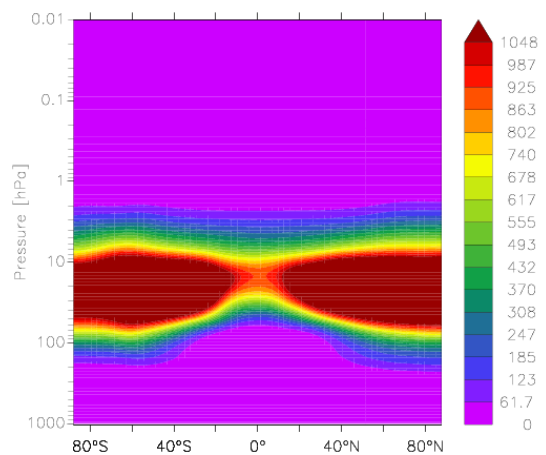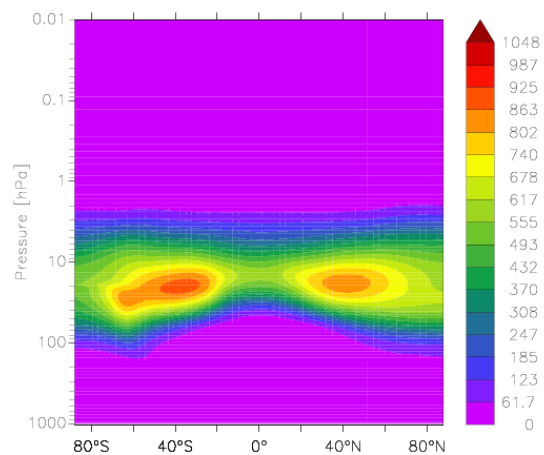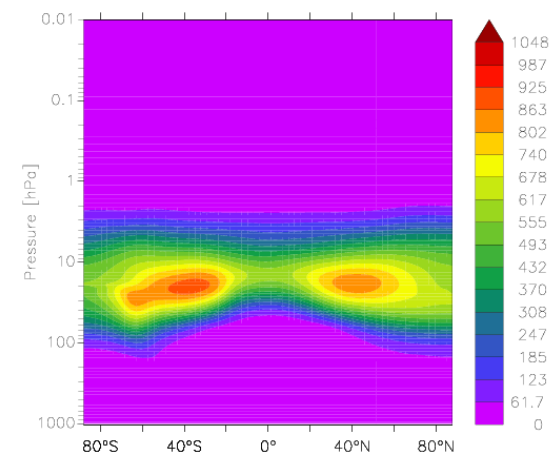

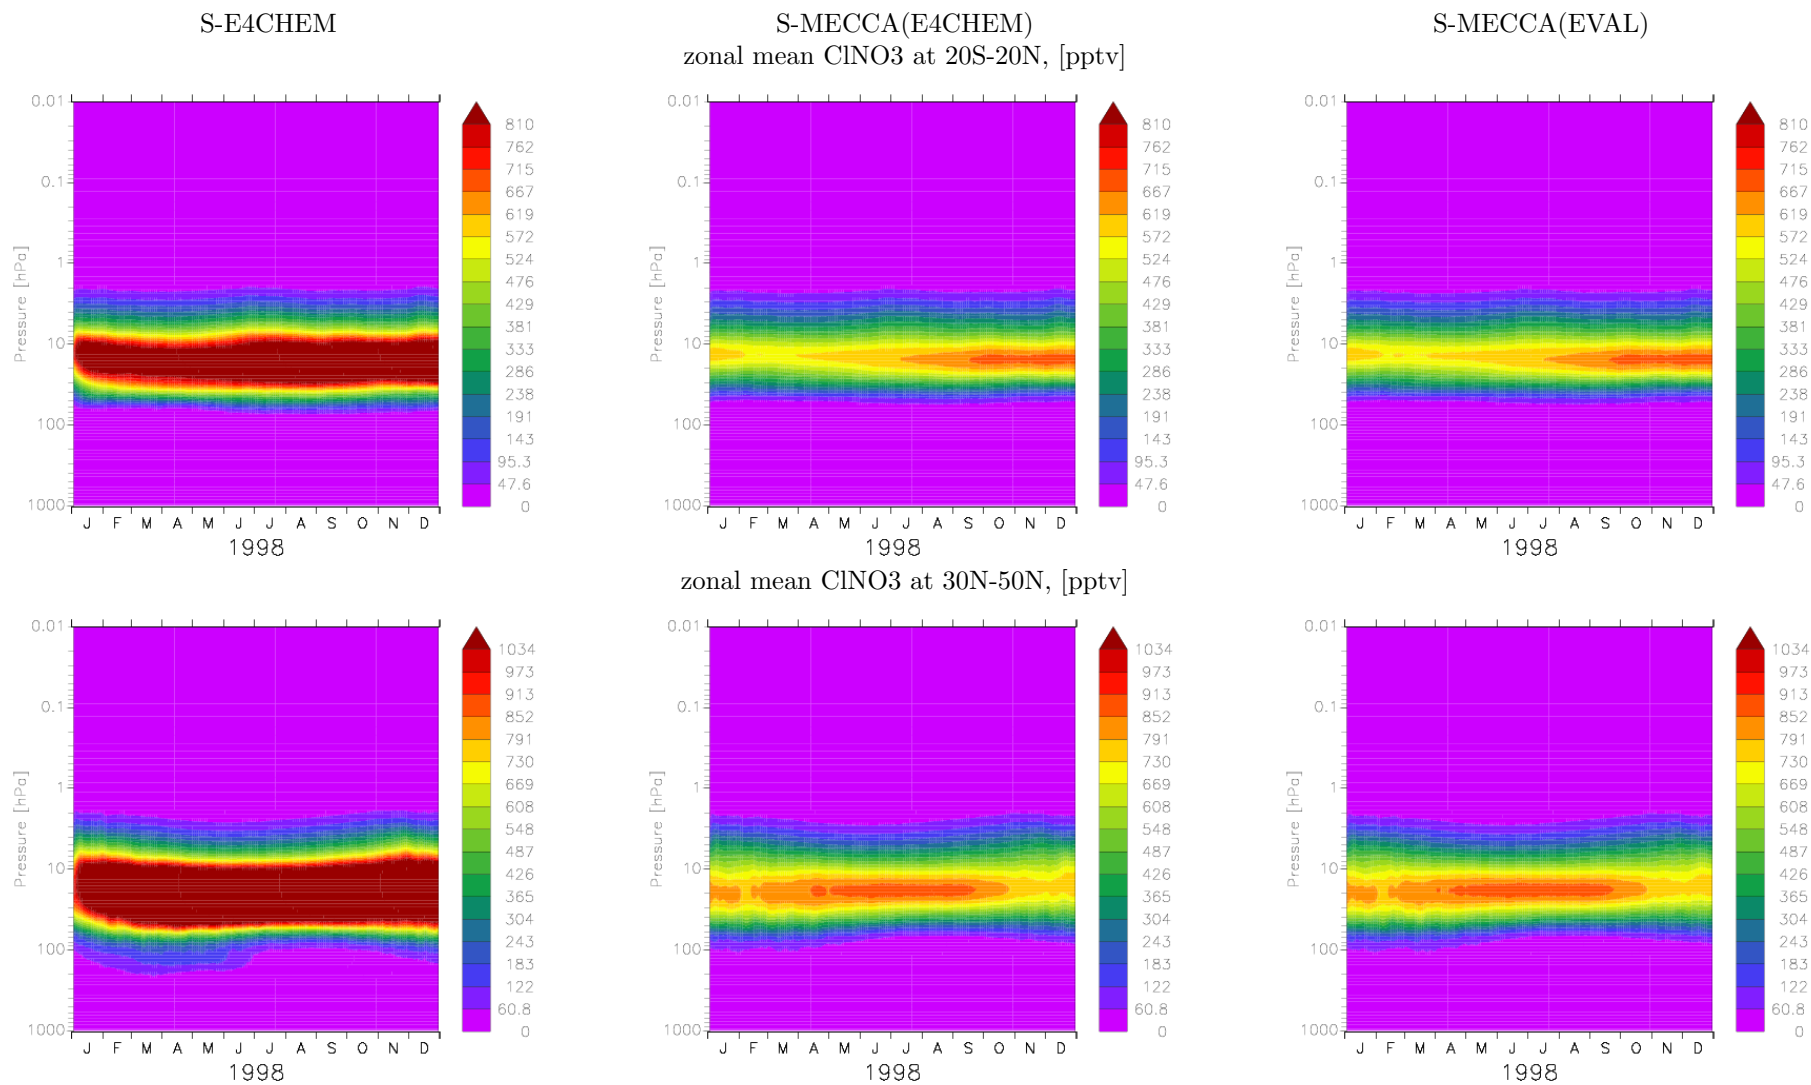

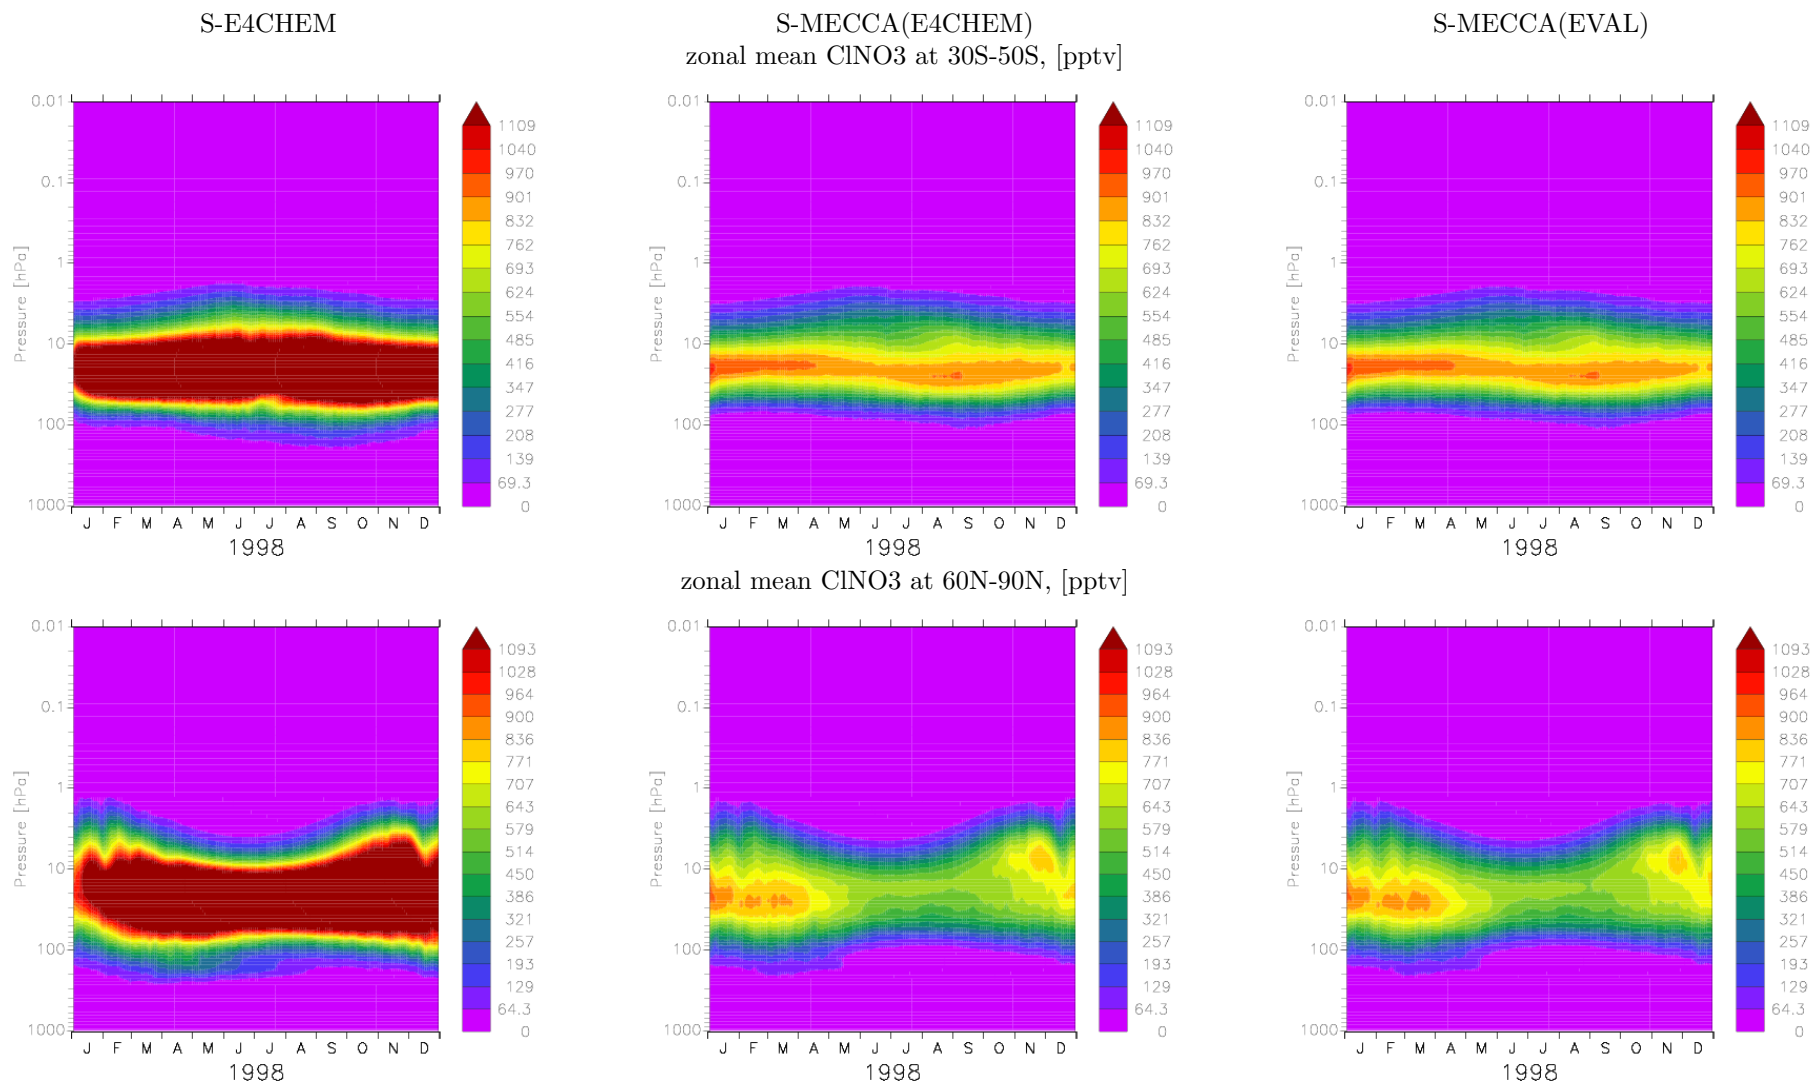

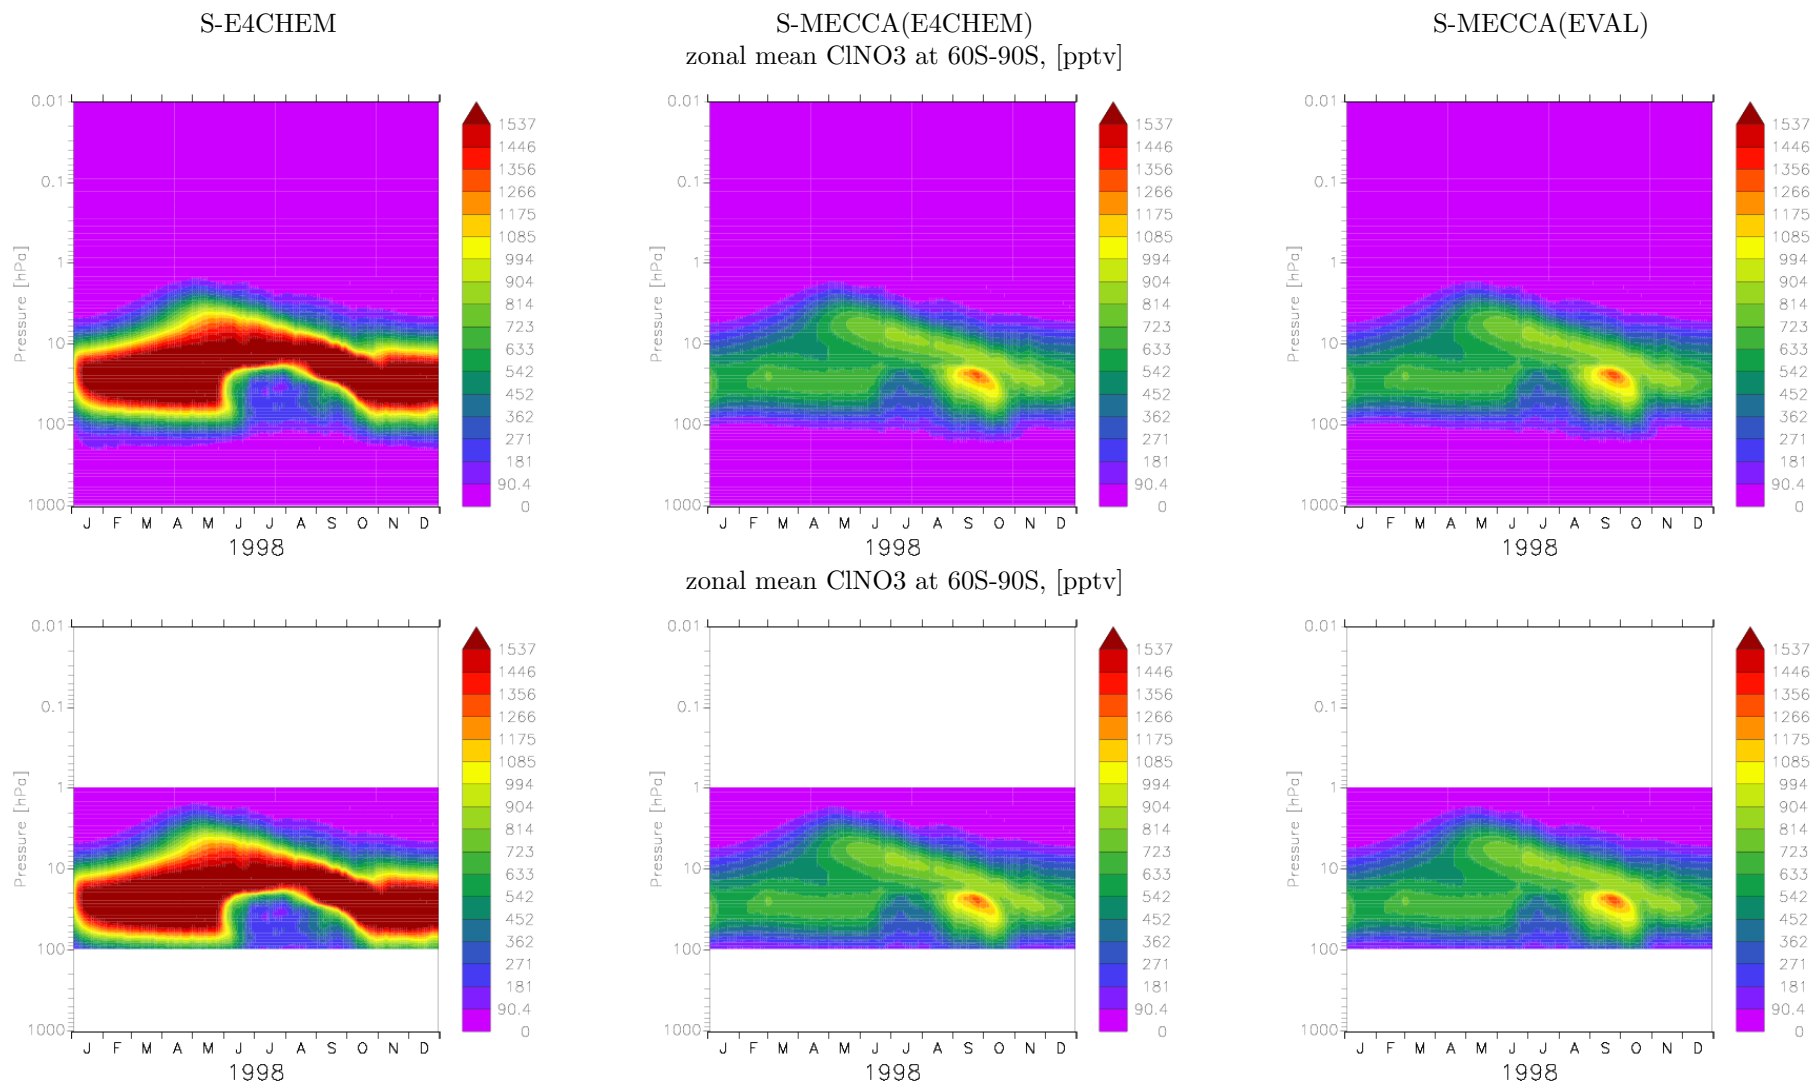

## 2 Species: ClO

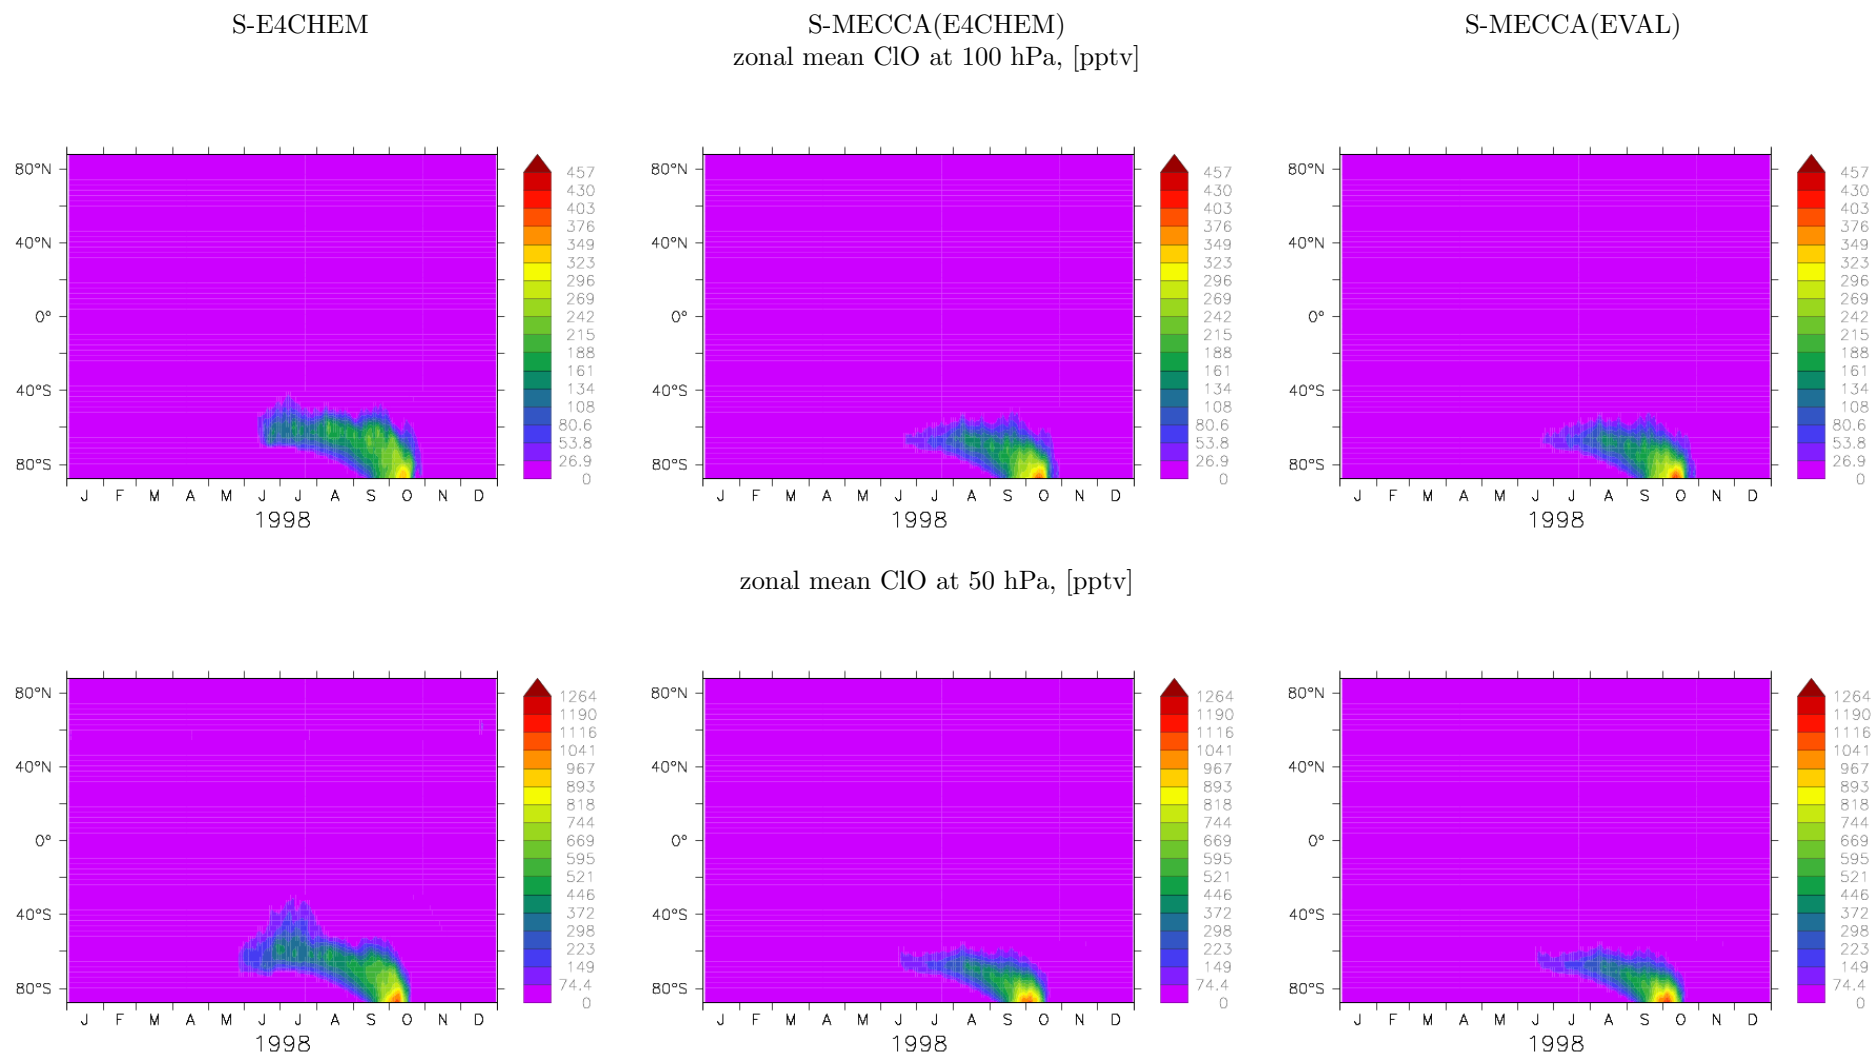

S-E4CHEM

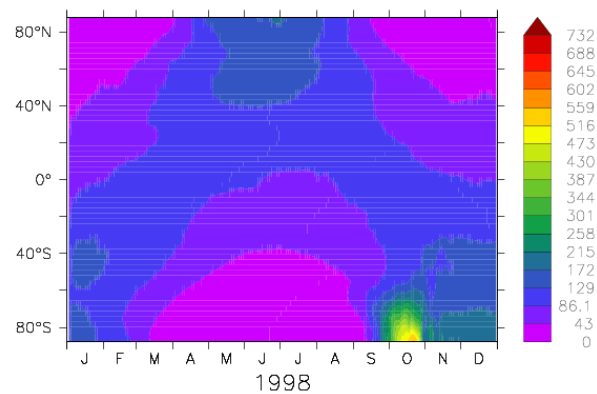S-MECCA(E4CHEM)  
zonal mean ClO at 10 hPa, [pptv]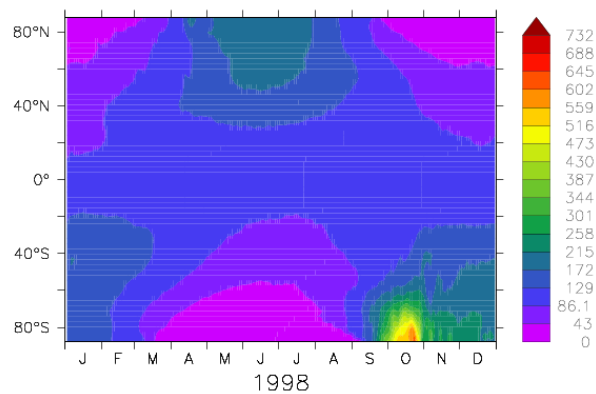

S-MECCA(EVAL)

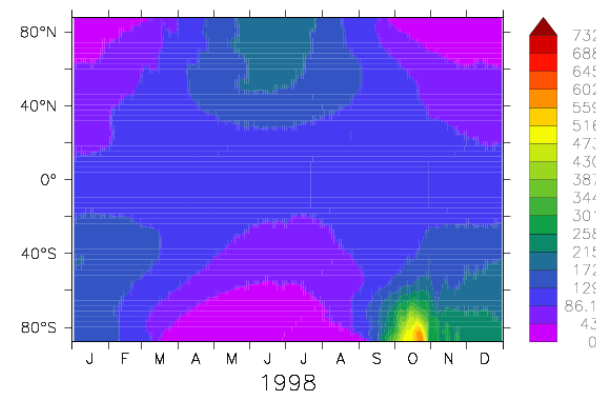

zonal mean ClO at 1 hPa, [pptv]

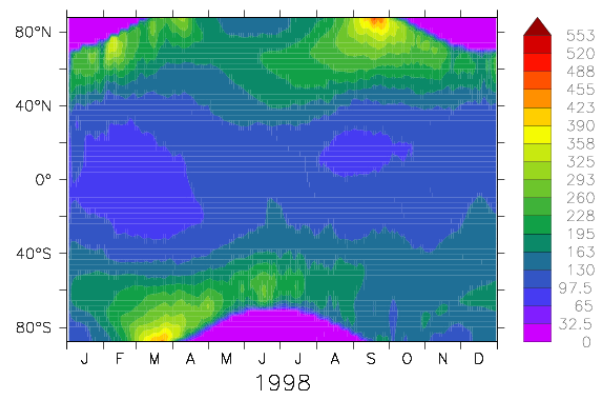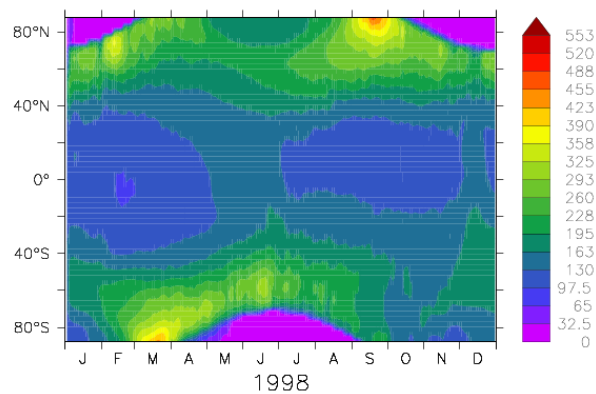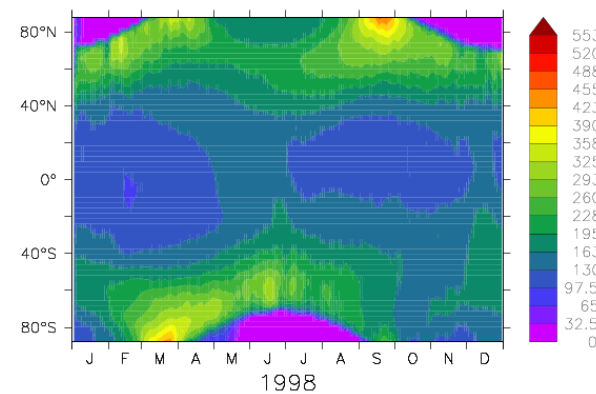

S-E4CHEM

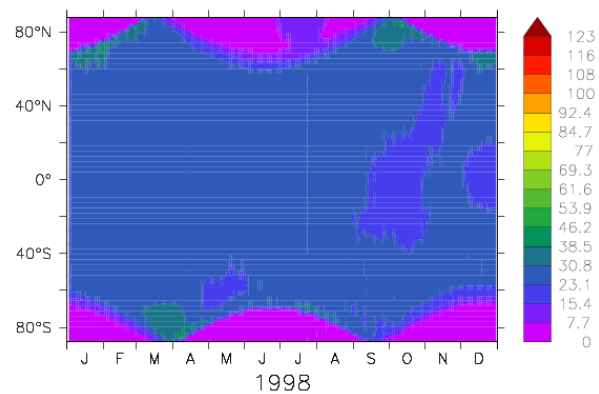S-MECCA(E4CHEM)  
zonal mean  $\text{ClO}$  at 0.1 hPa, [pptv]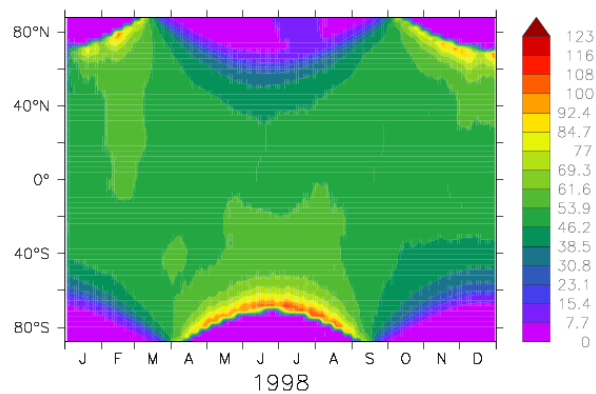

S-MECCA(EVAL)

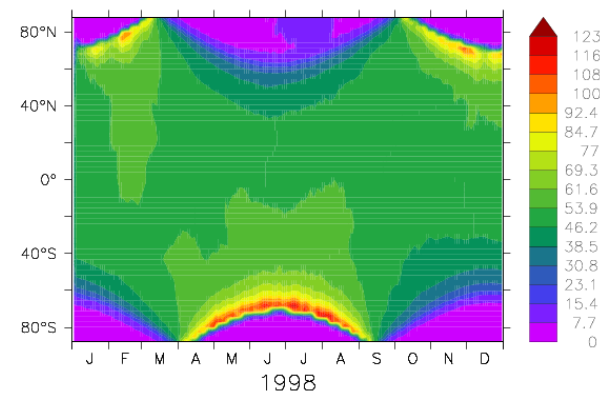zonal mean  $\text{ClO}$  at t=1-Jan-1998:31-Dec-1998, [pptv]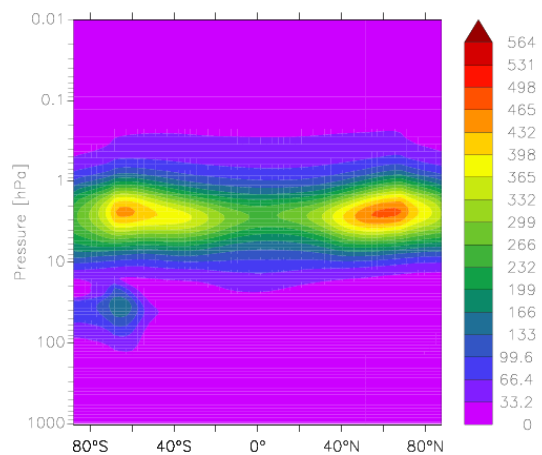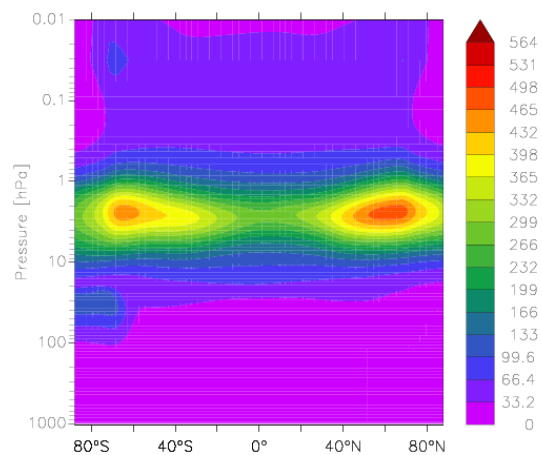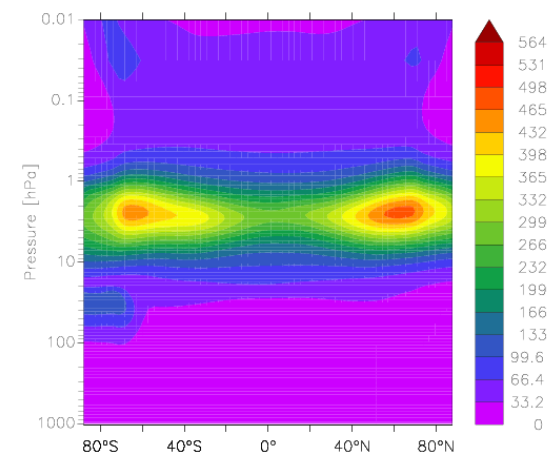



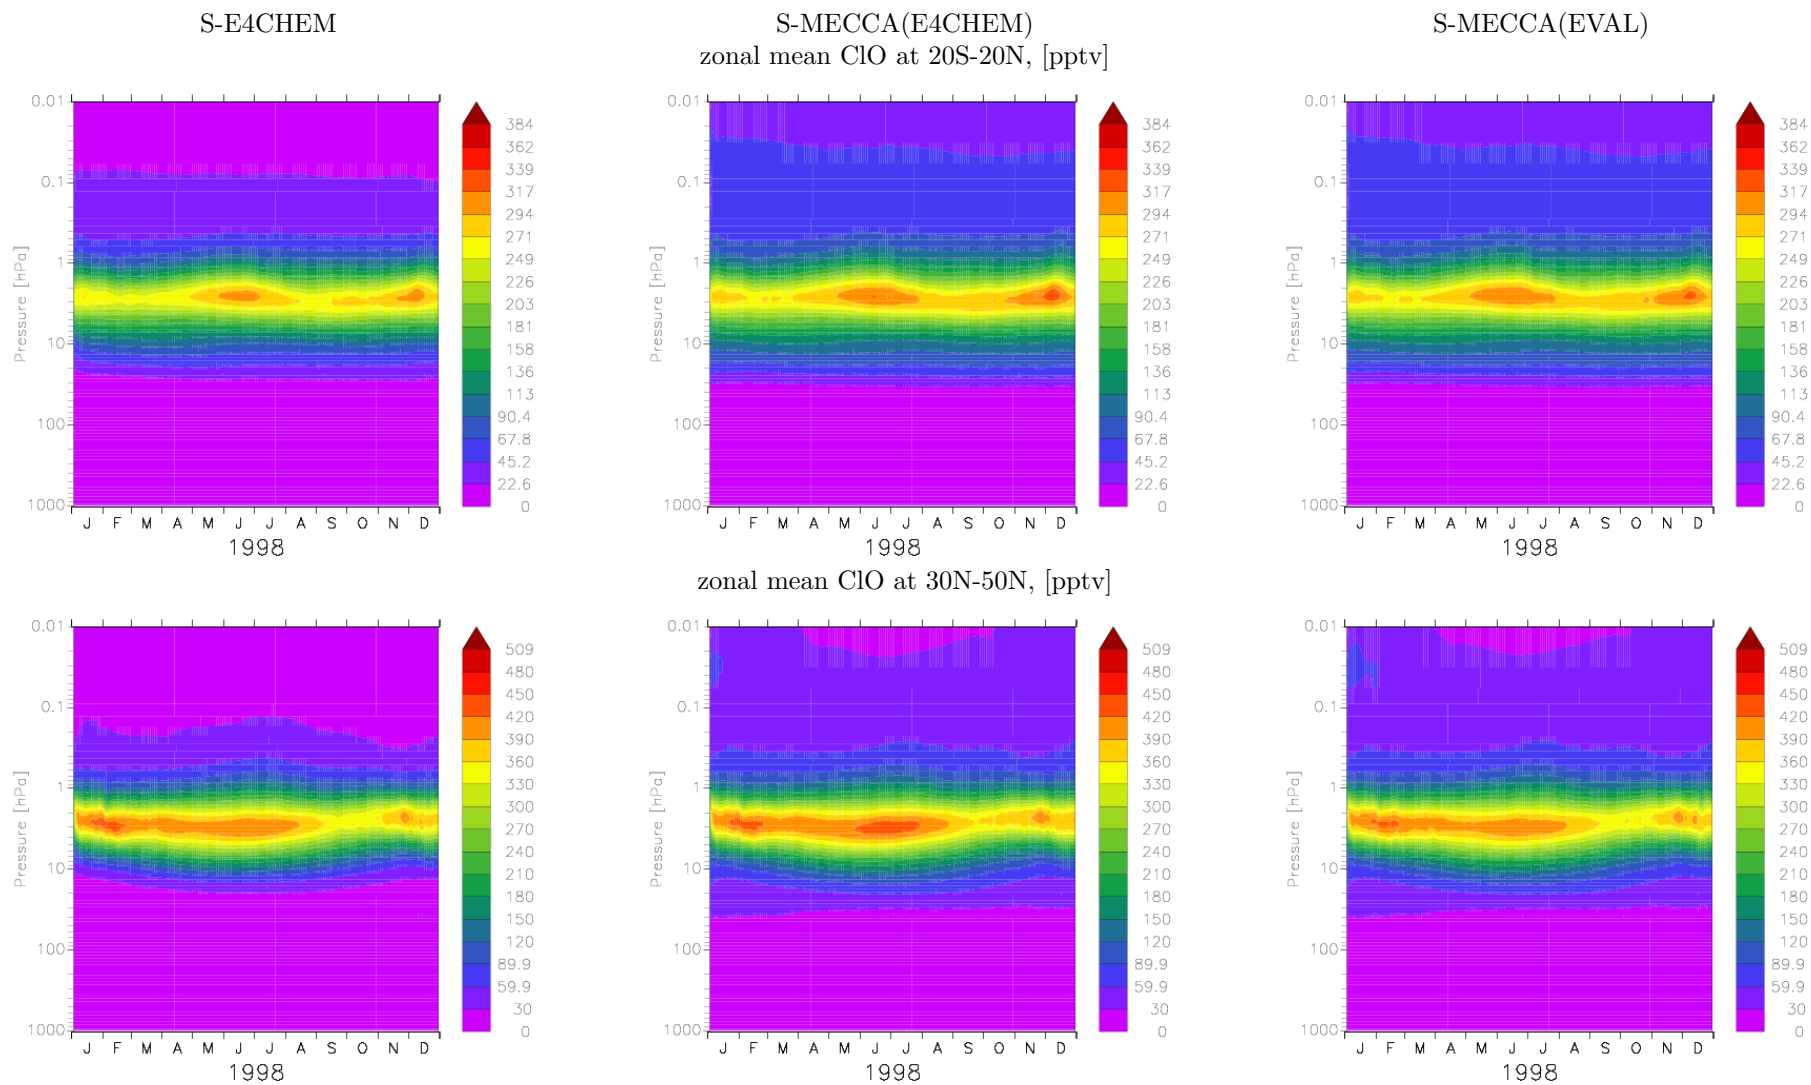



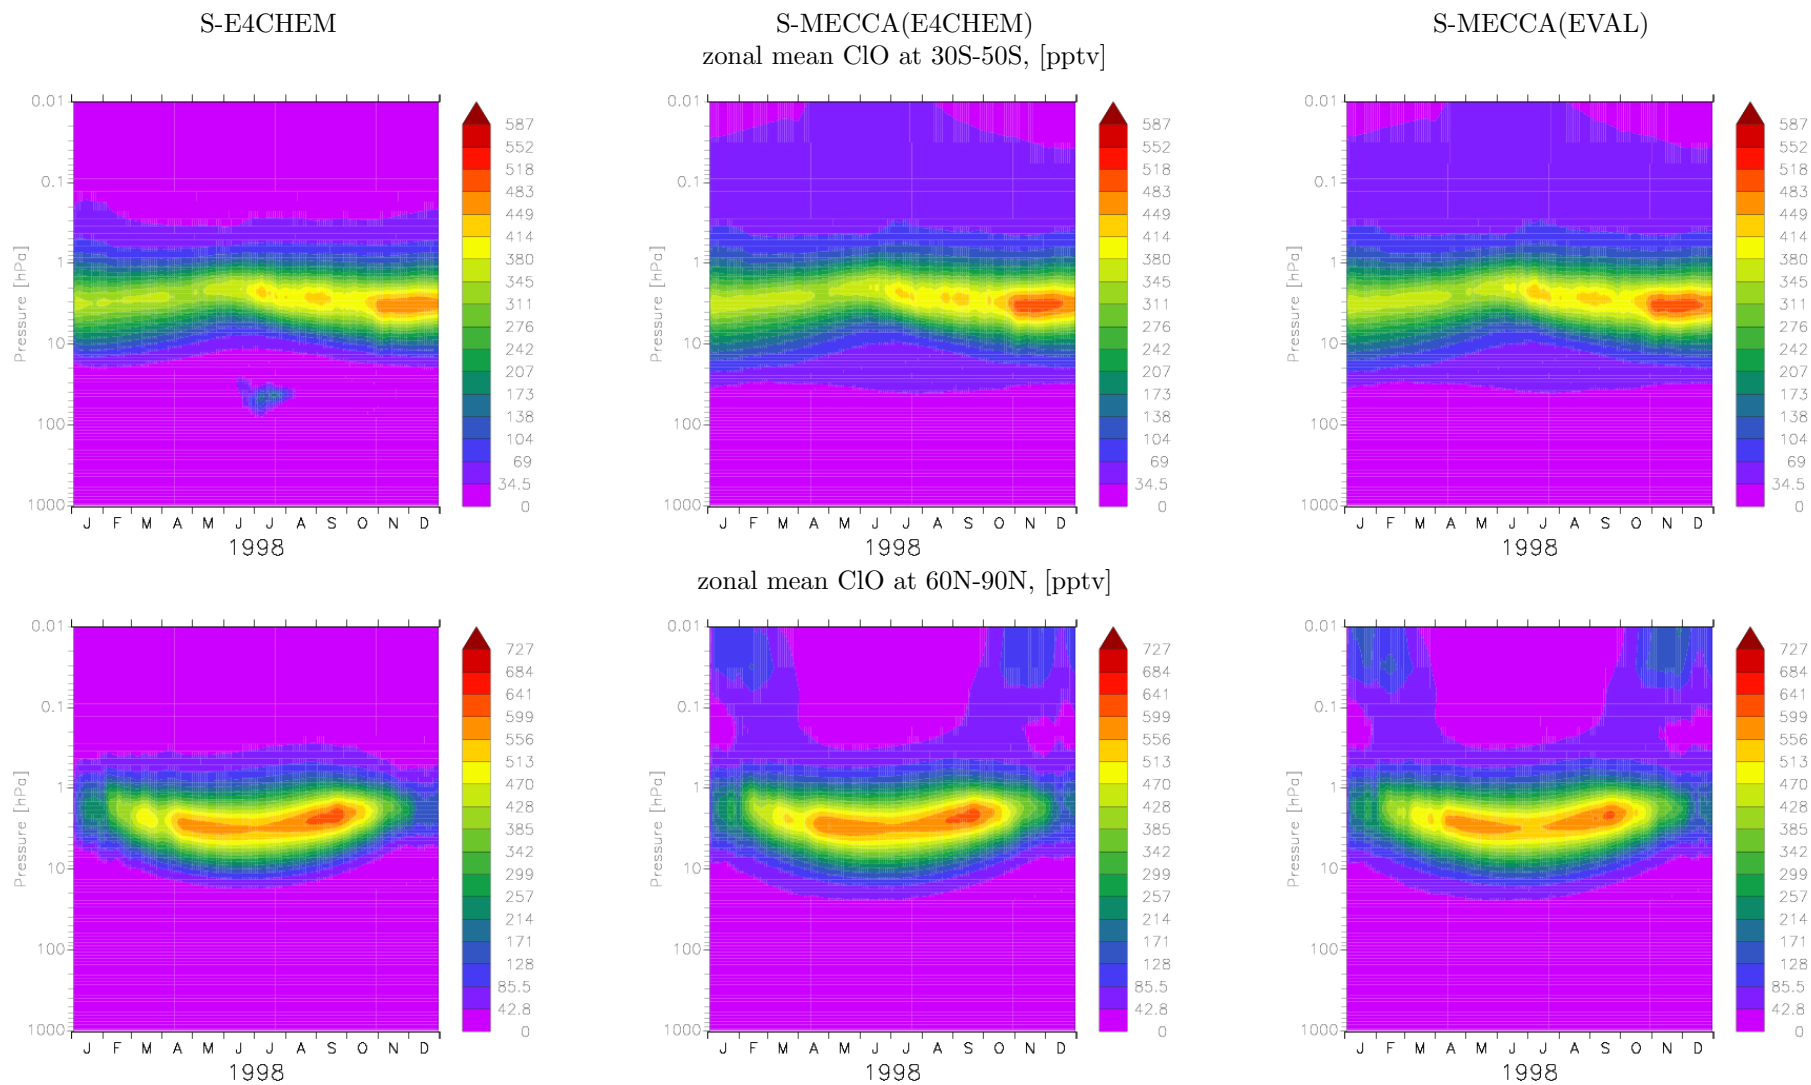

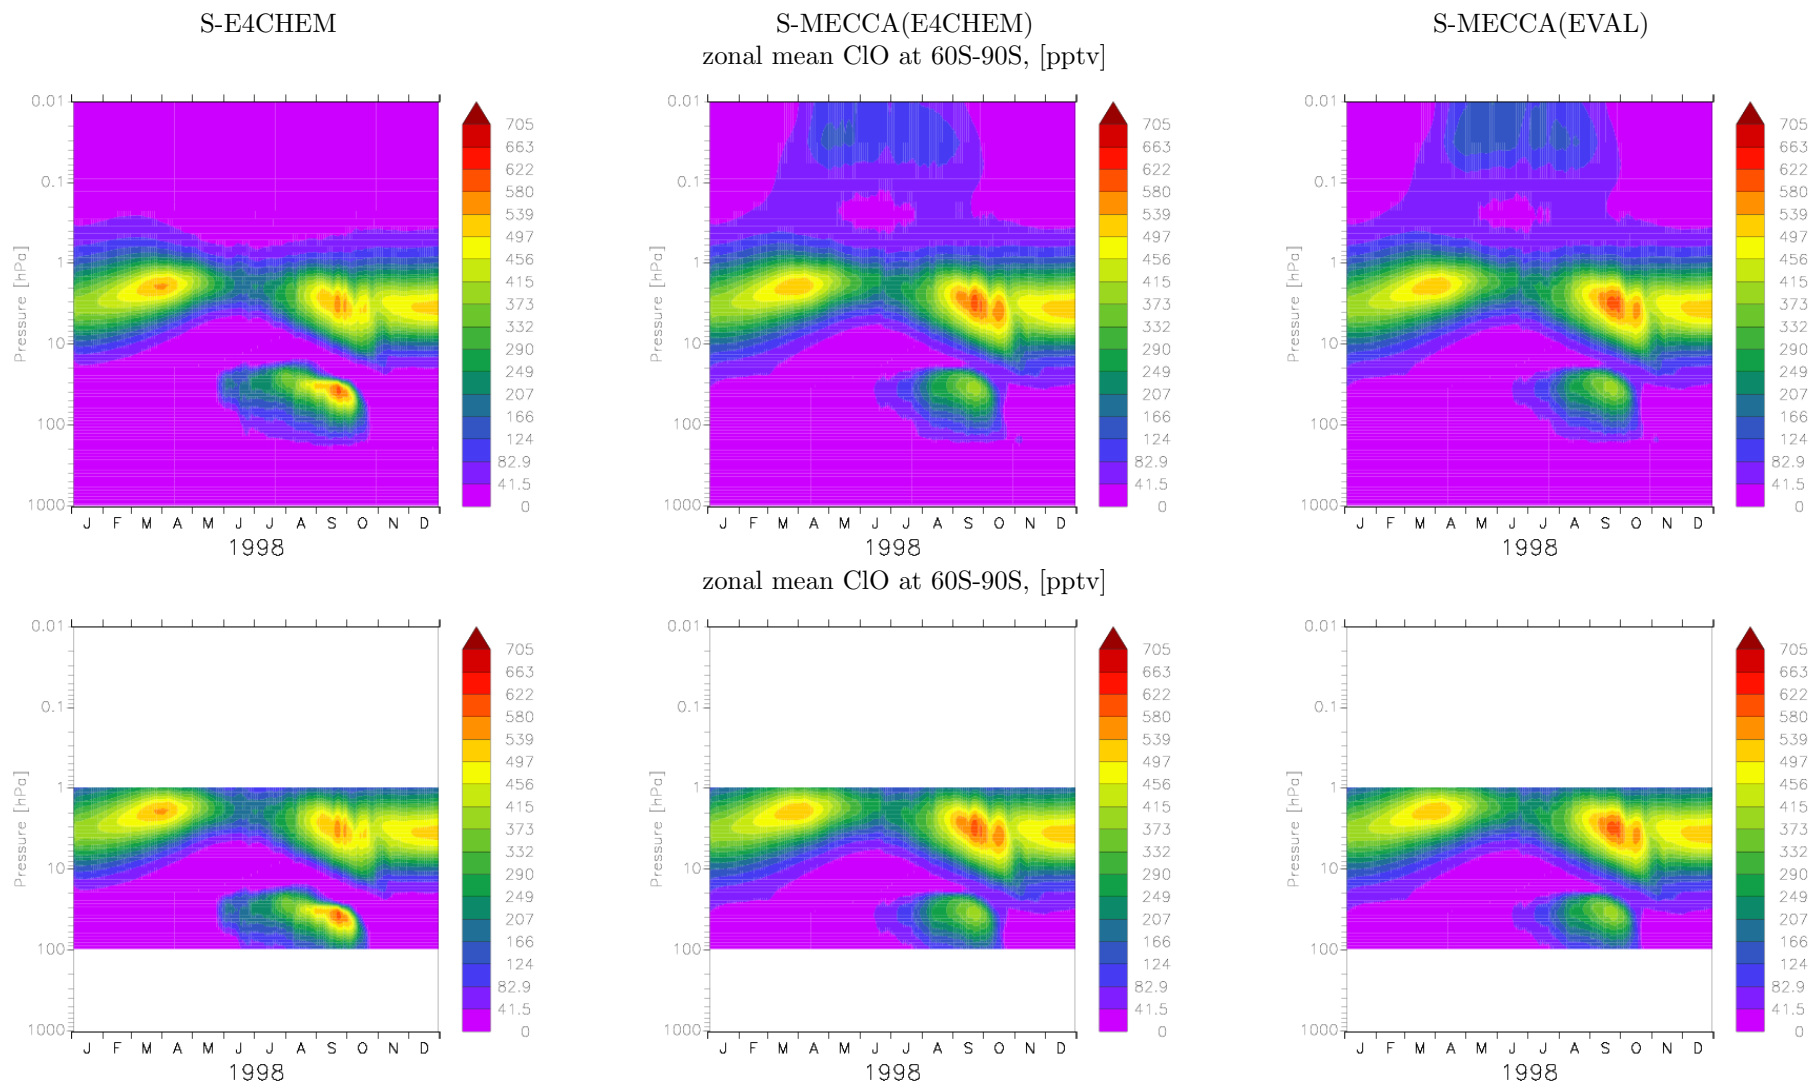

### 3 Species: ClOX

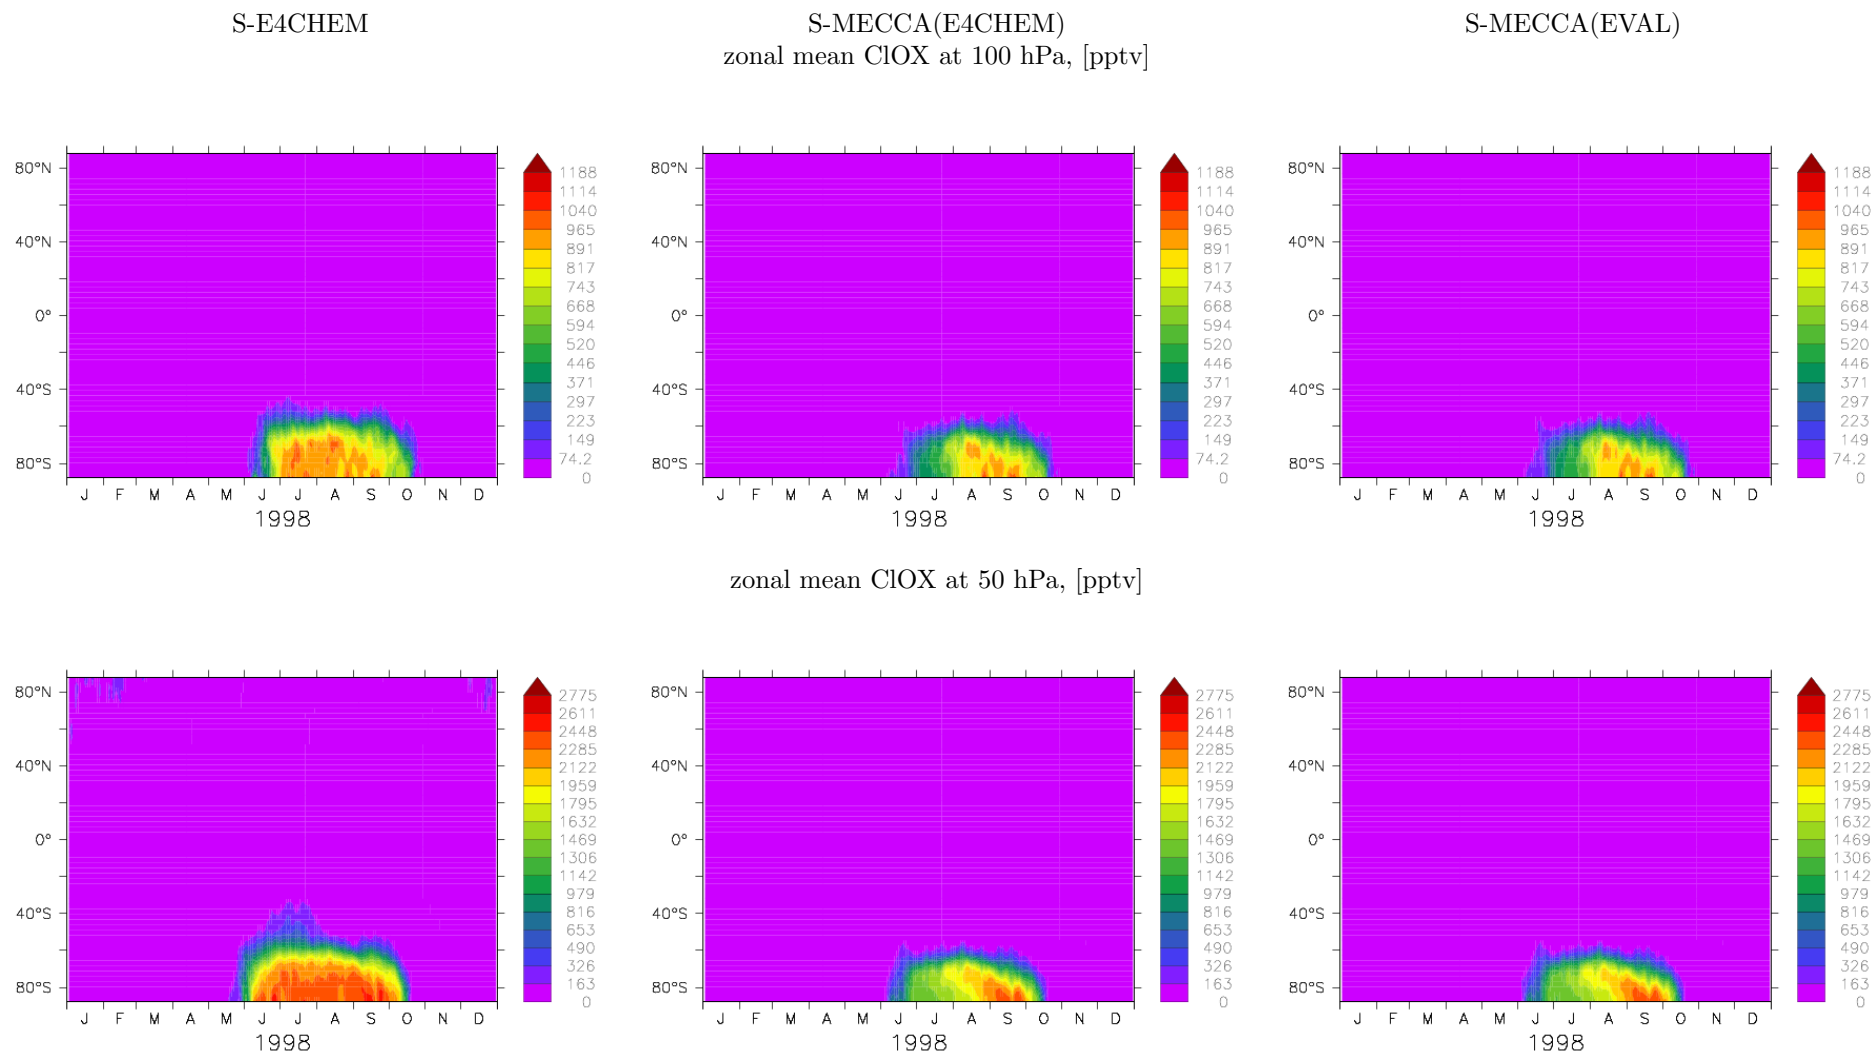

S-E4CHEM

S-MECCA(E4CHEM)  
zonal mean ClOX at 10 hPa, [pptv]

S-MECCA(EVAL)

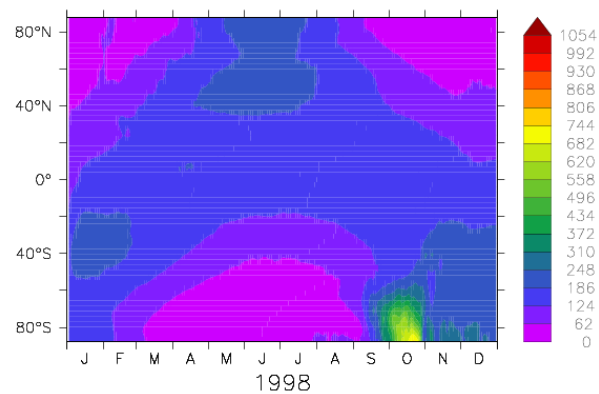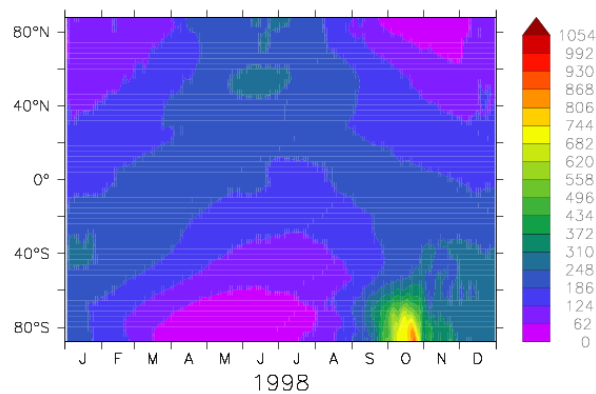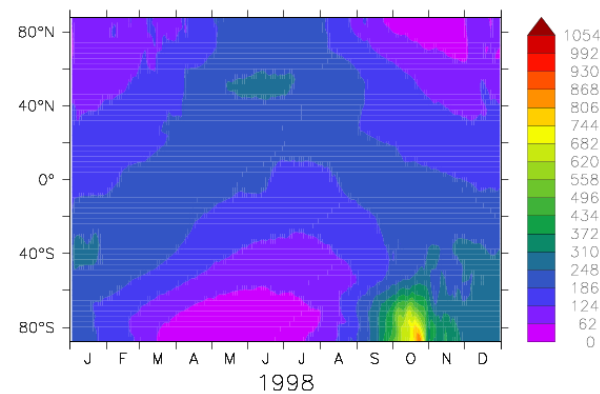

zonal mean ClOX at 1 hPa, [pptv]

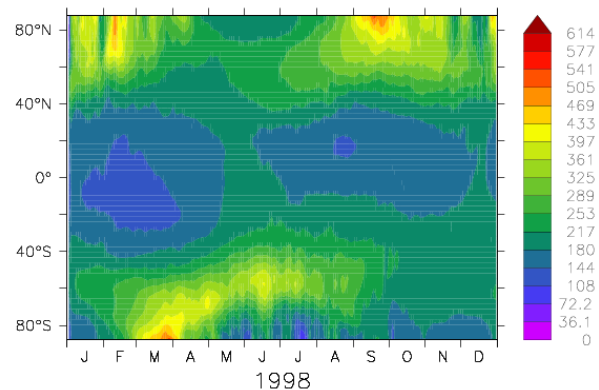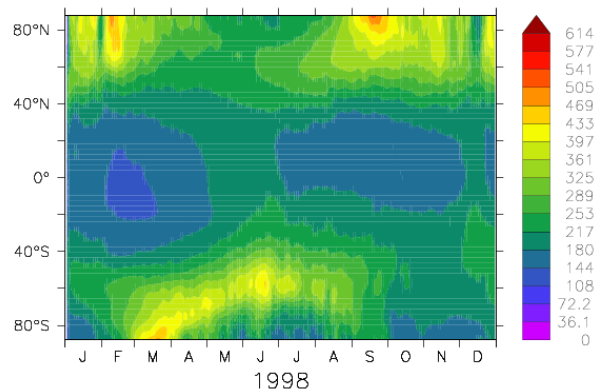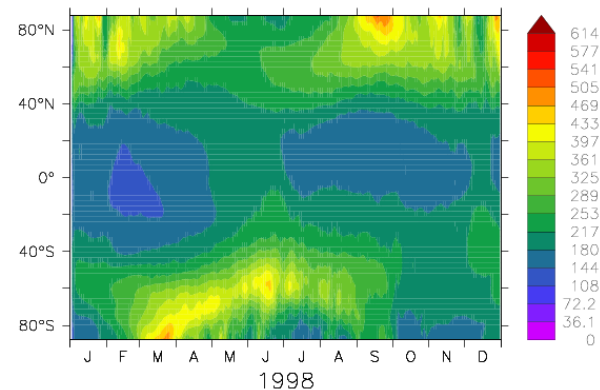

S-E4CHEM

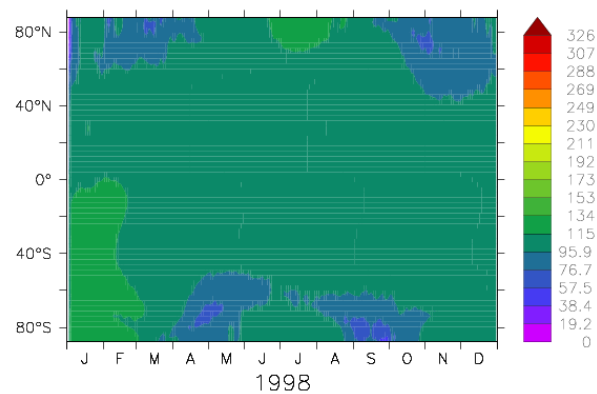S-MECCA(E4CHEM)  
zonal mean CIOX at 0.1 hPa, [pptv]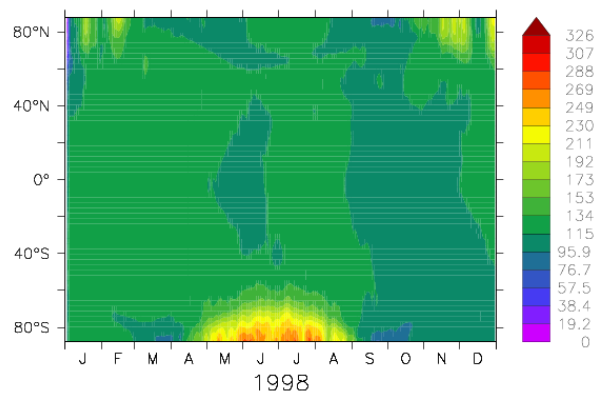

S-MECCA(EVAL)

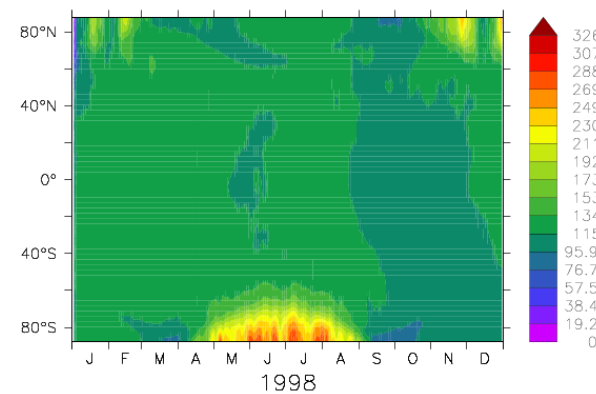

zonal mean CIOX at t=1-Jan-1998:31-Dec-1998, [pptv]

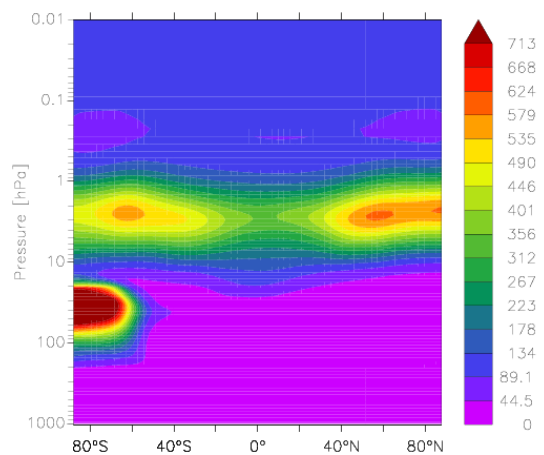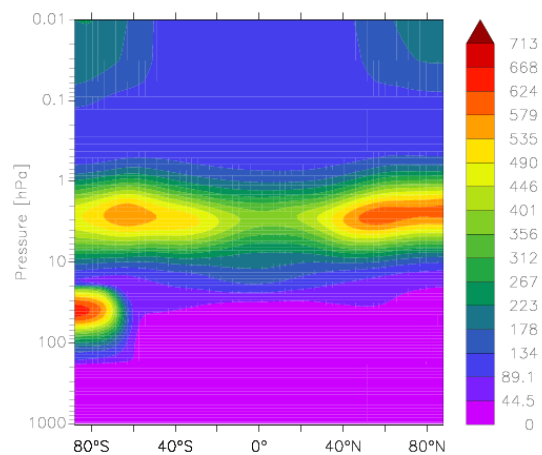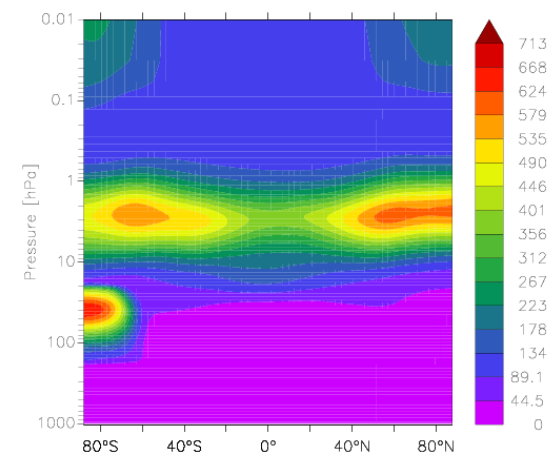

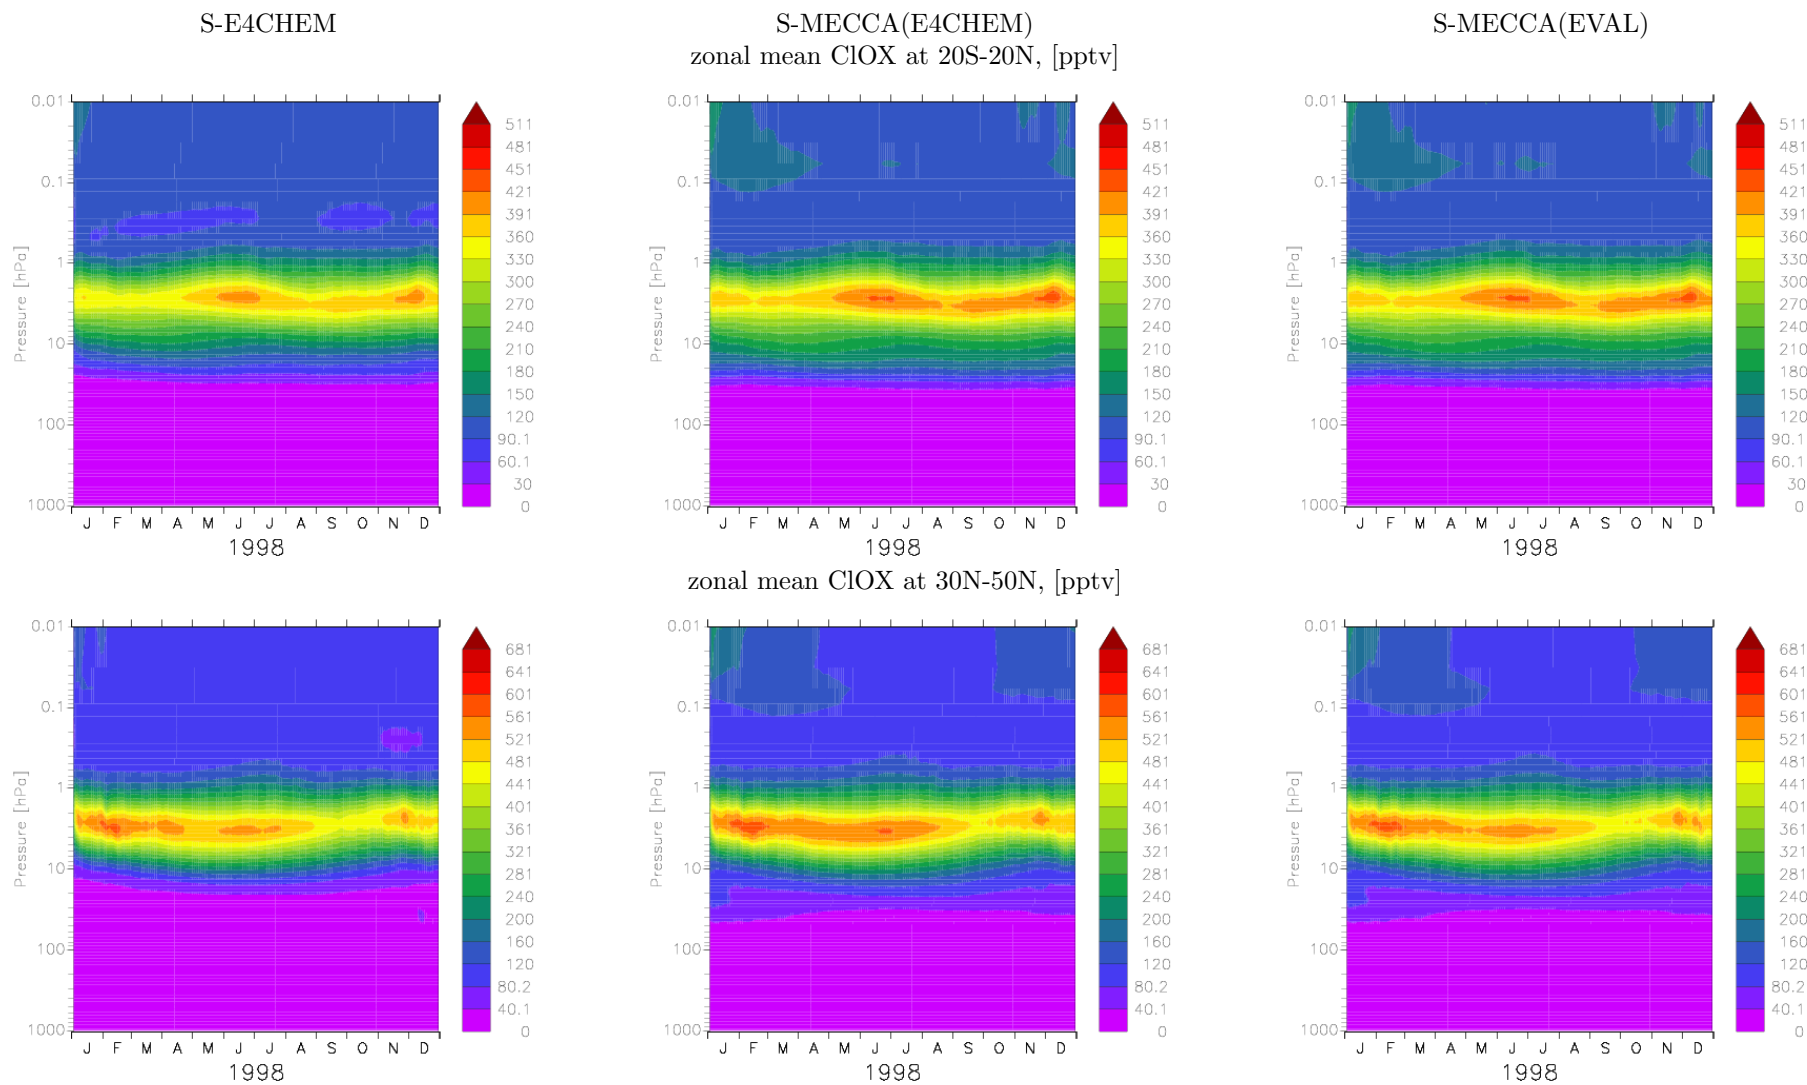

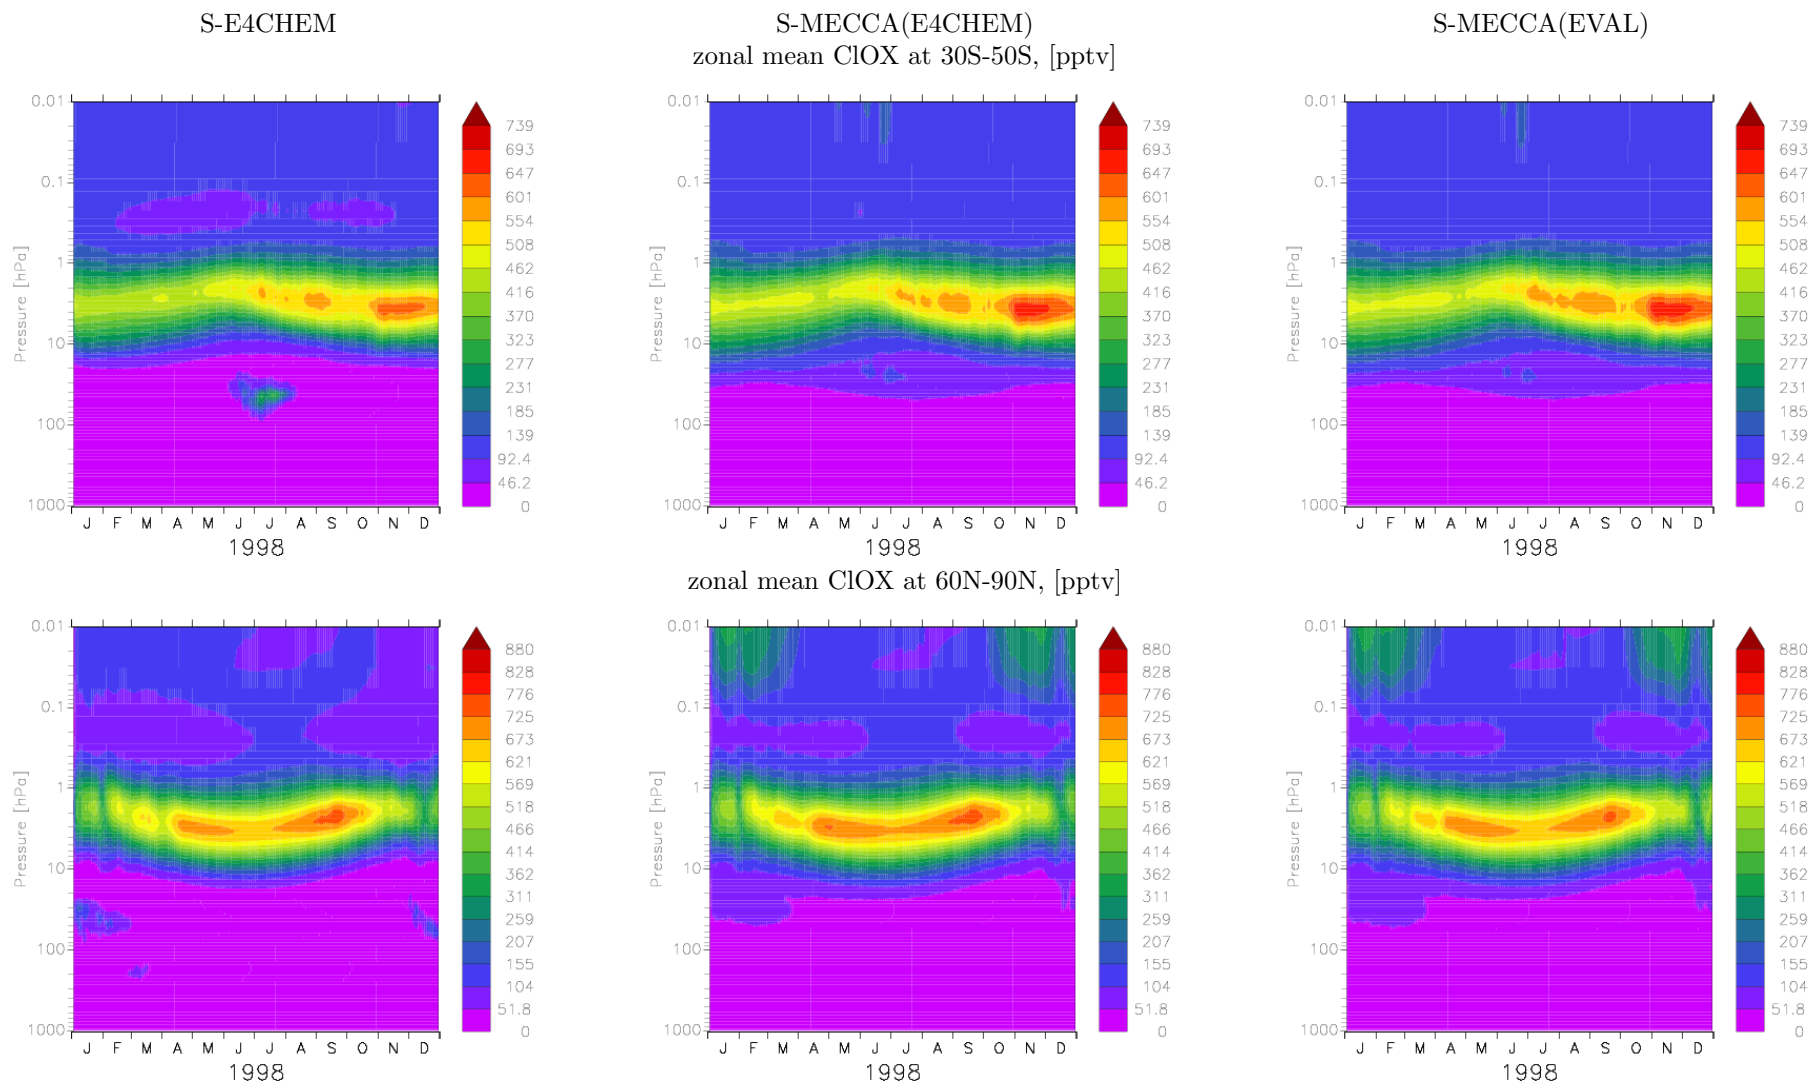



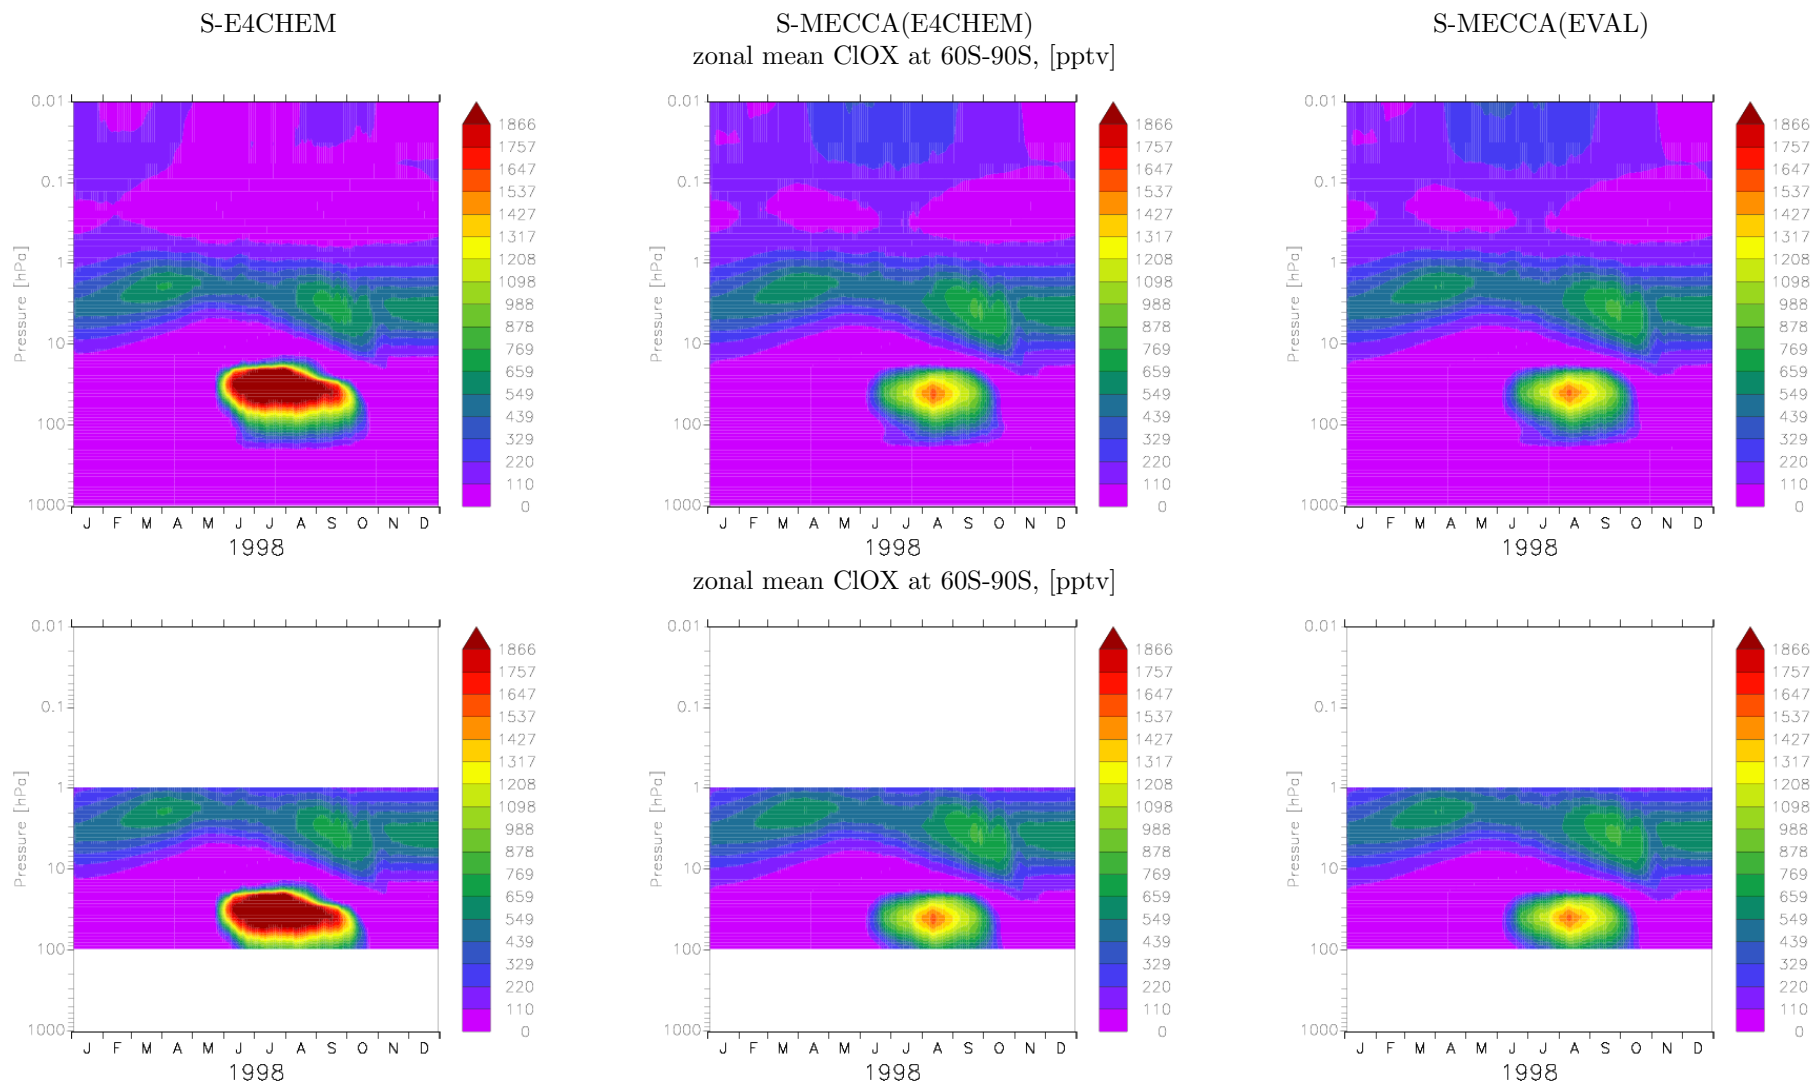



## 4 Species: CO

S-E4CHEM

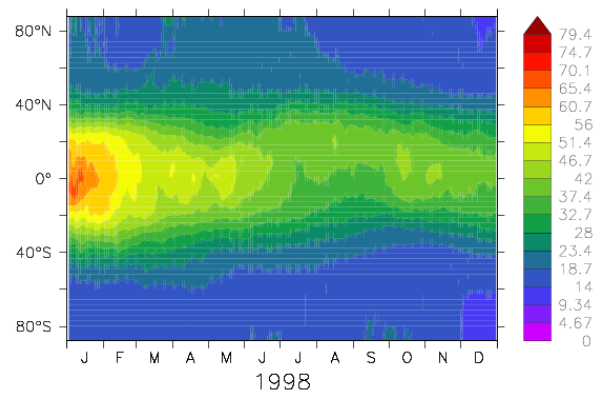S-MECCA(E4CHEM)  
zonal mean CO at 100 hPa, [ppbv]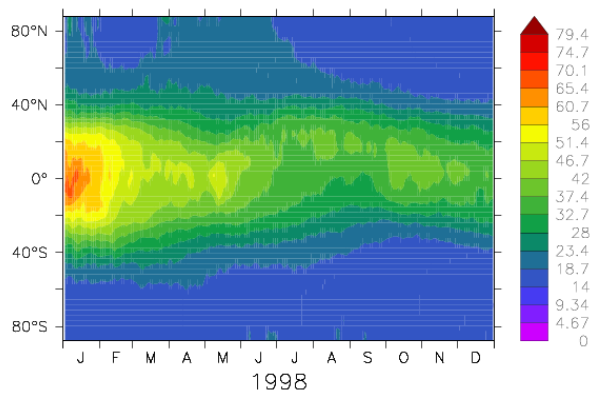

S-MECCA(EVAL)

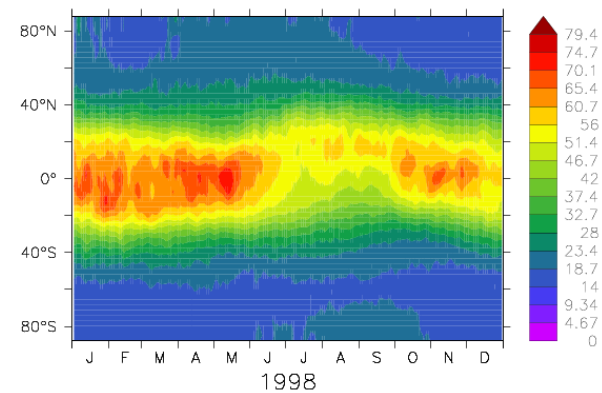

zonal mean CO at 50 hPa, [ppbv]

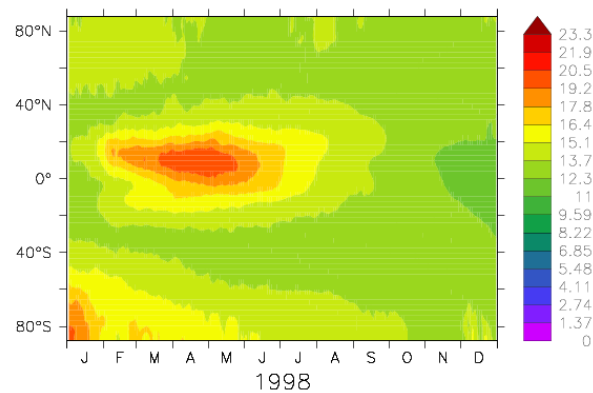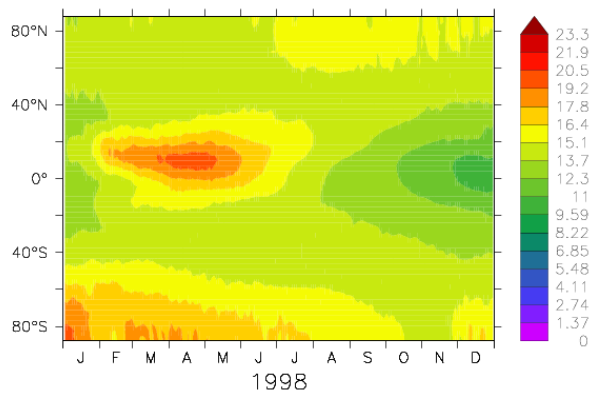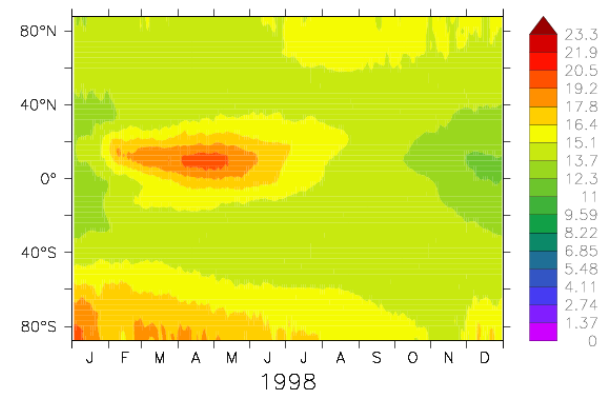

S-E4CHEM

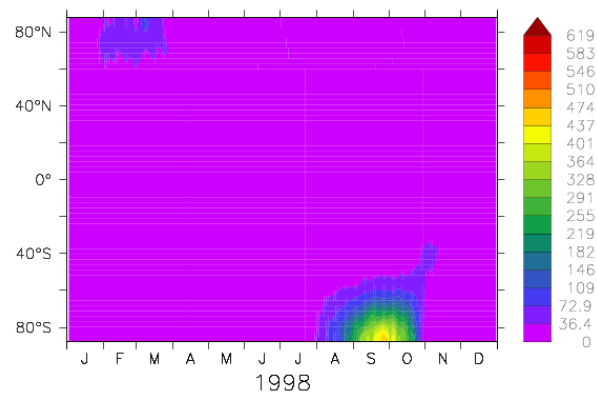S-MECCA(E4CHEM)  
zonal mean CO at 10 hPa, [ppbv]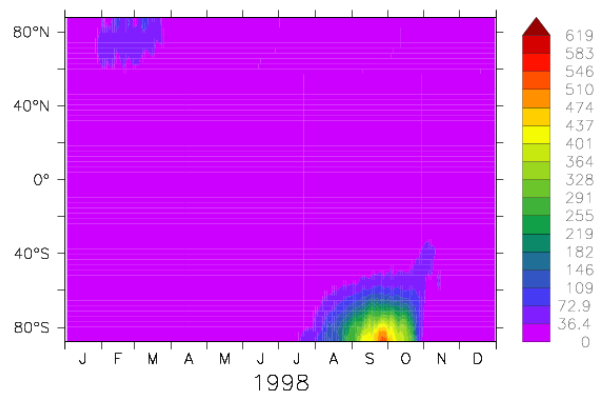

S-MECCA(EVAL)

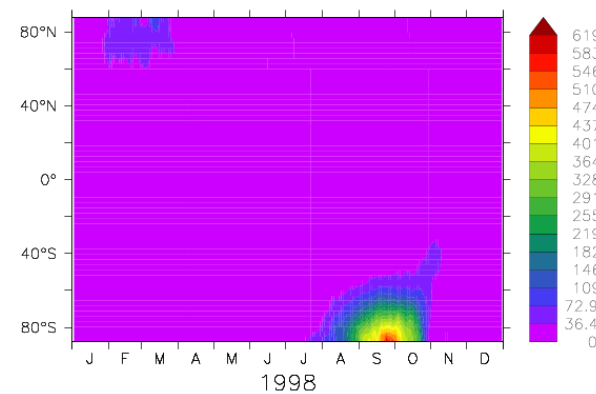

zonal mean CO at 1 hPa, [ppbv]

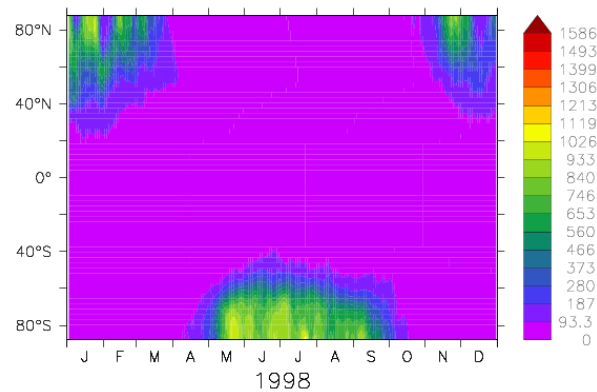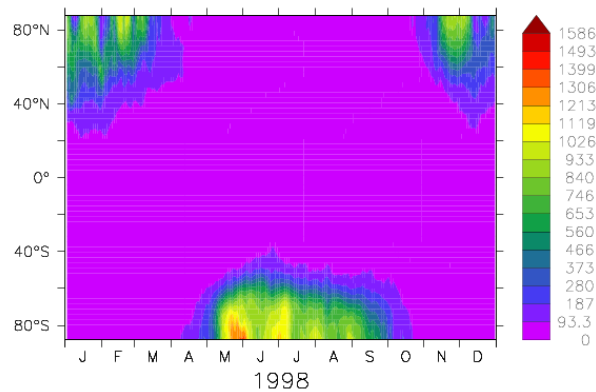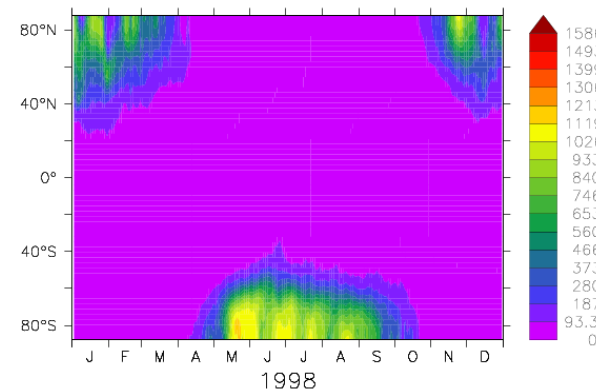

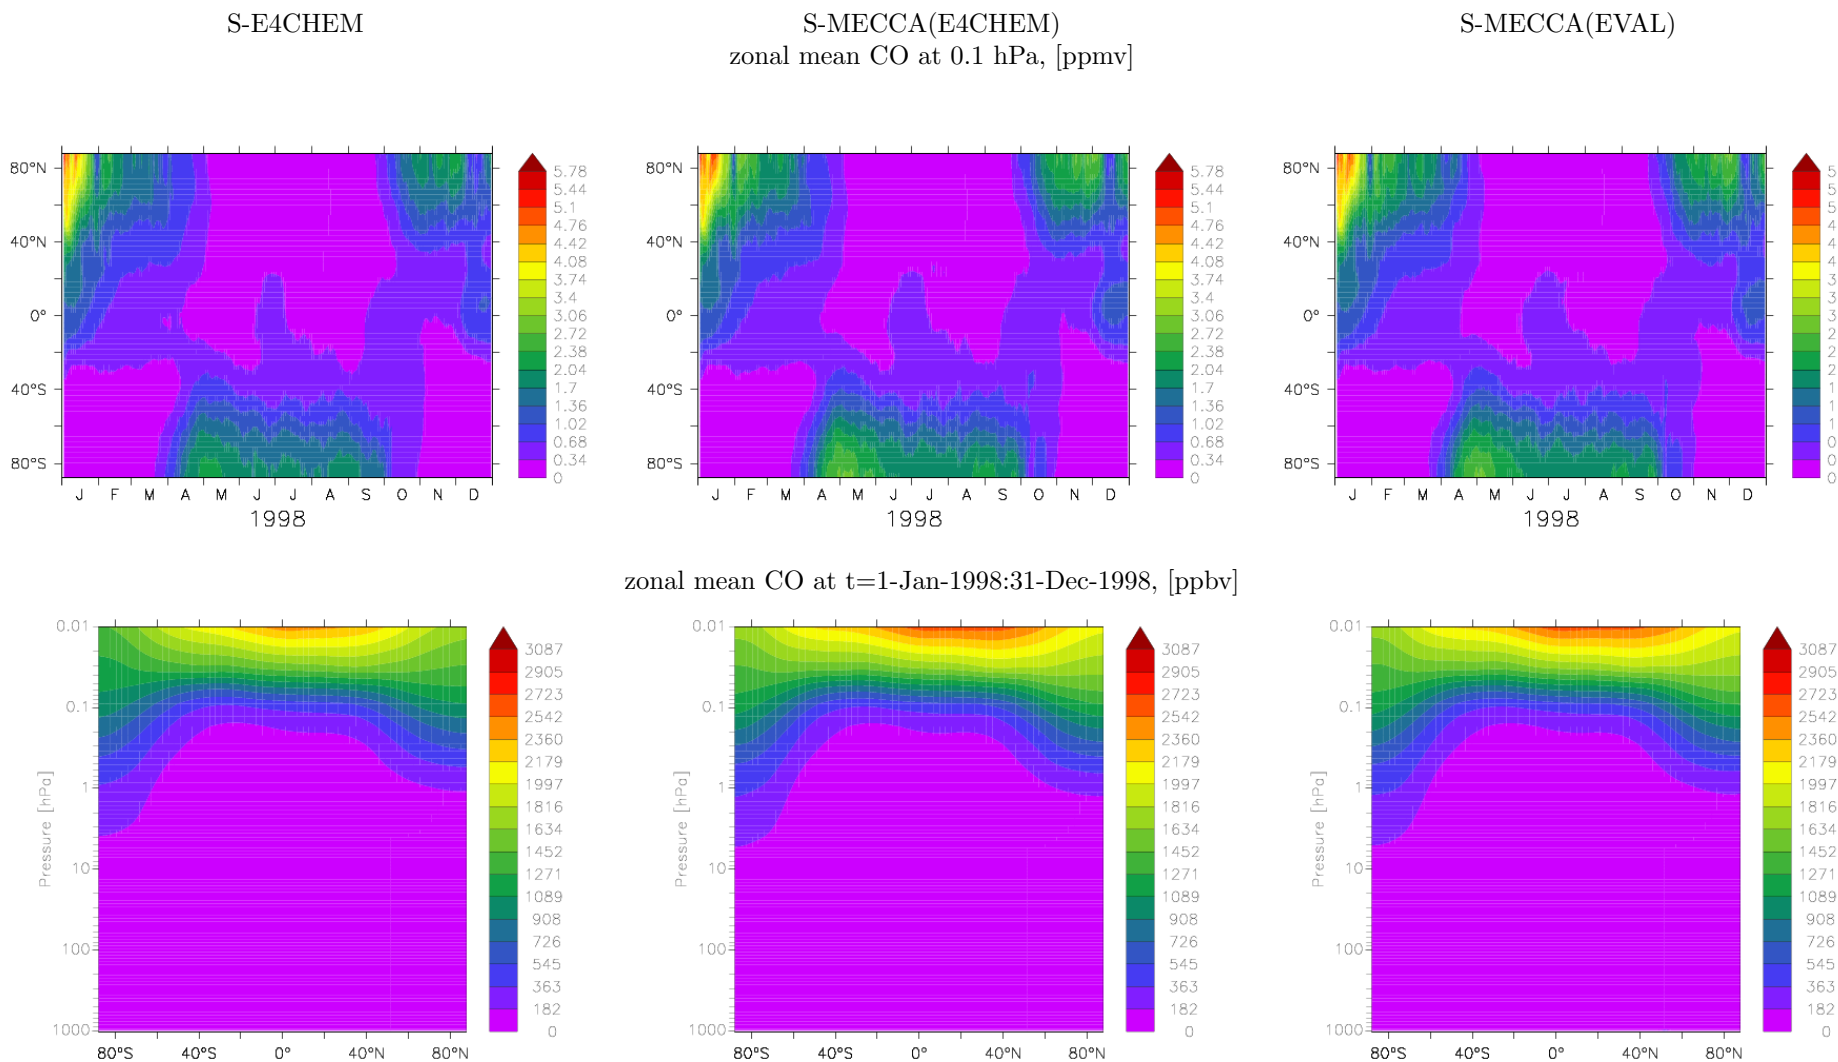

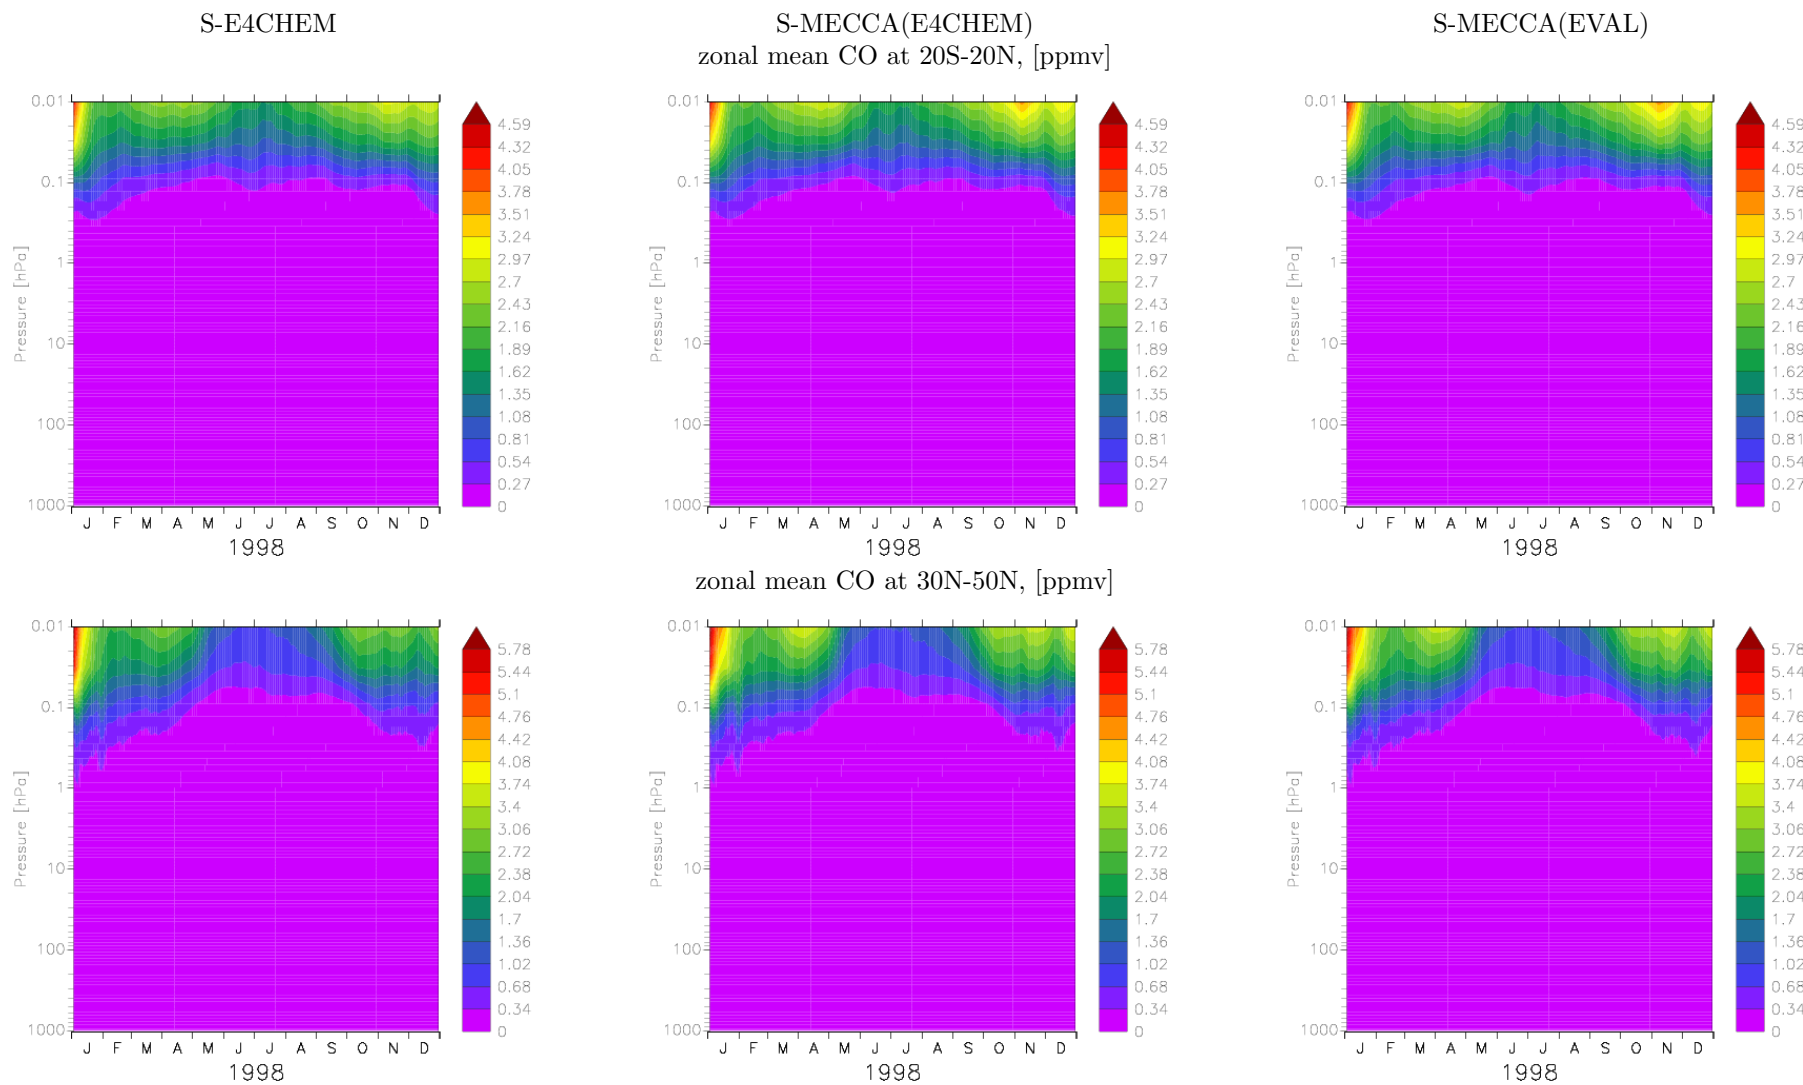

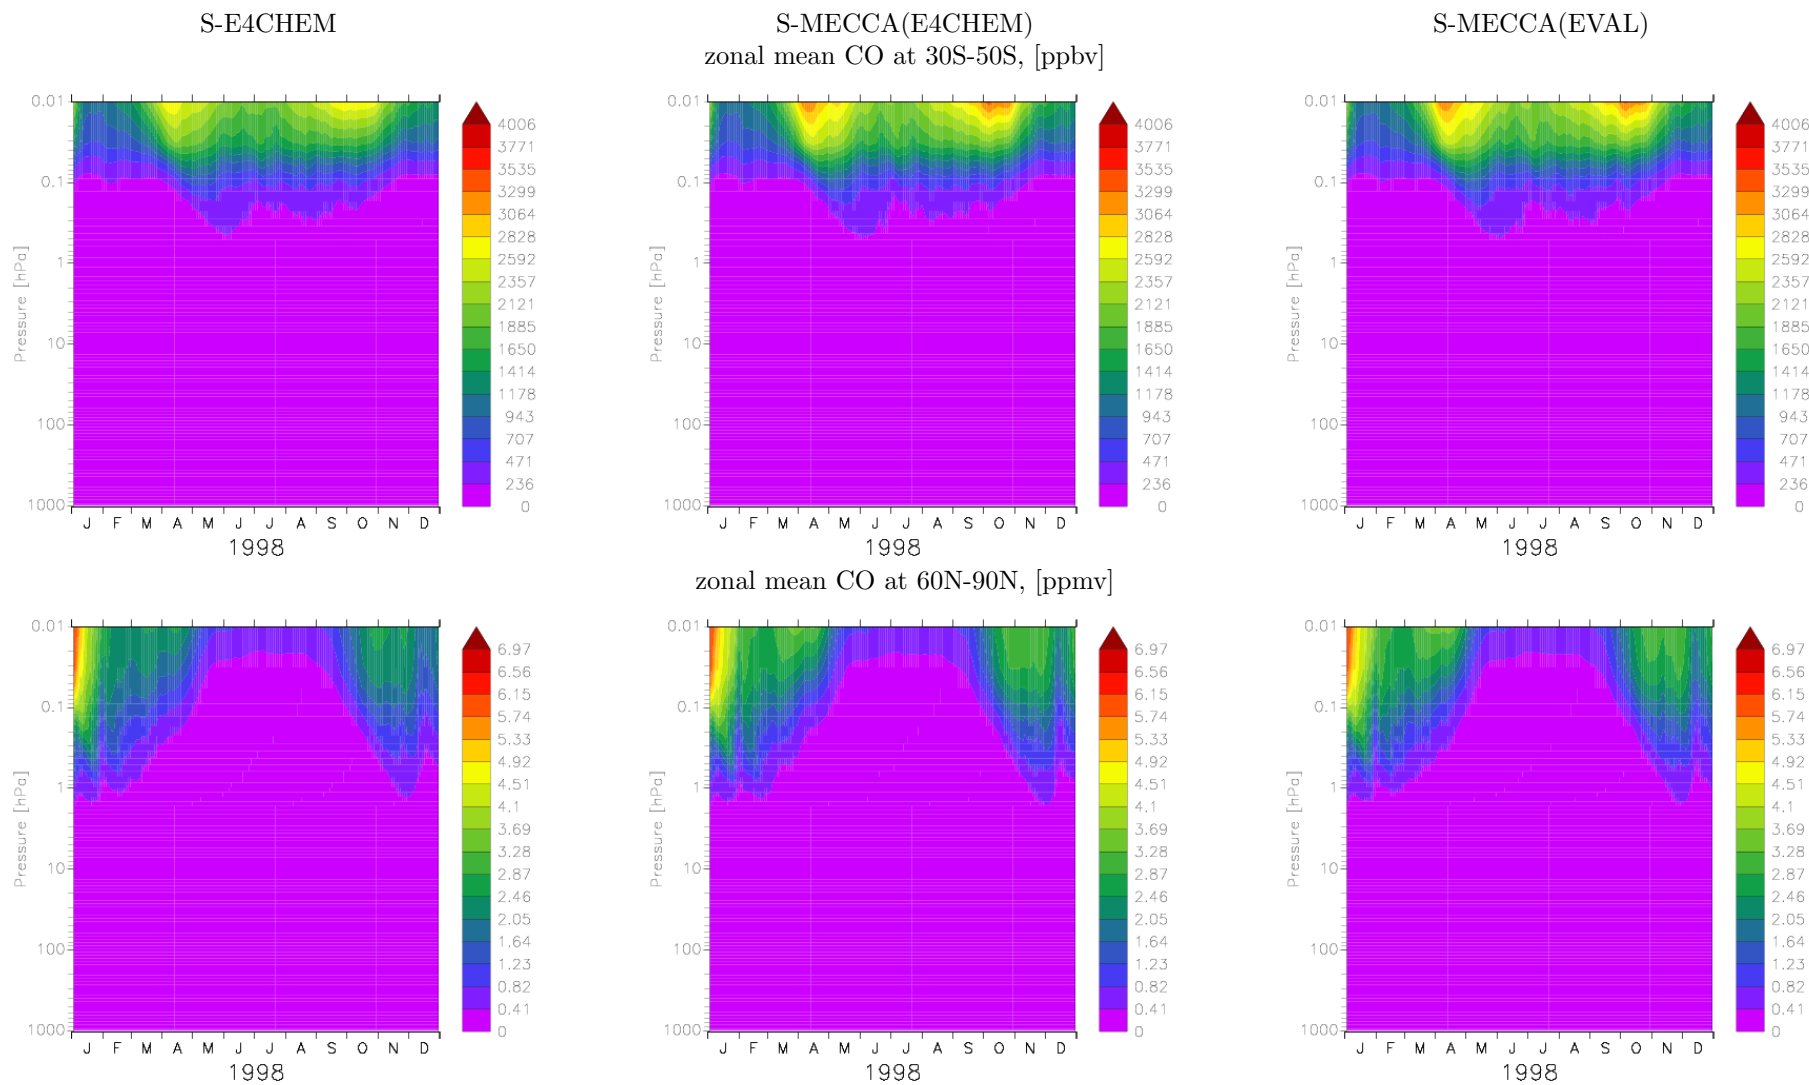

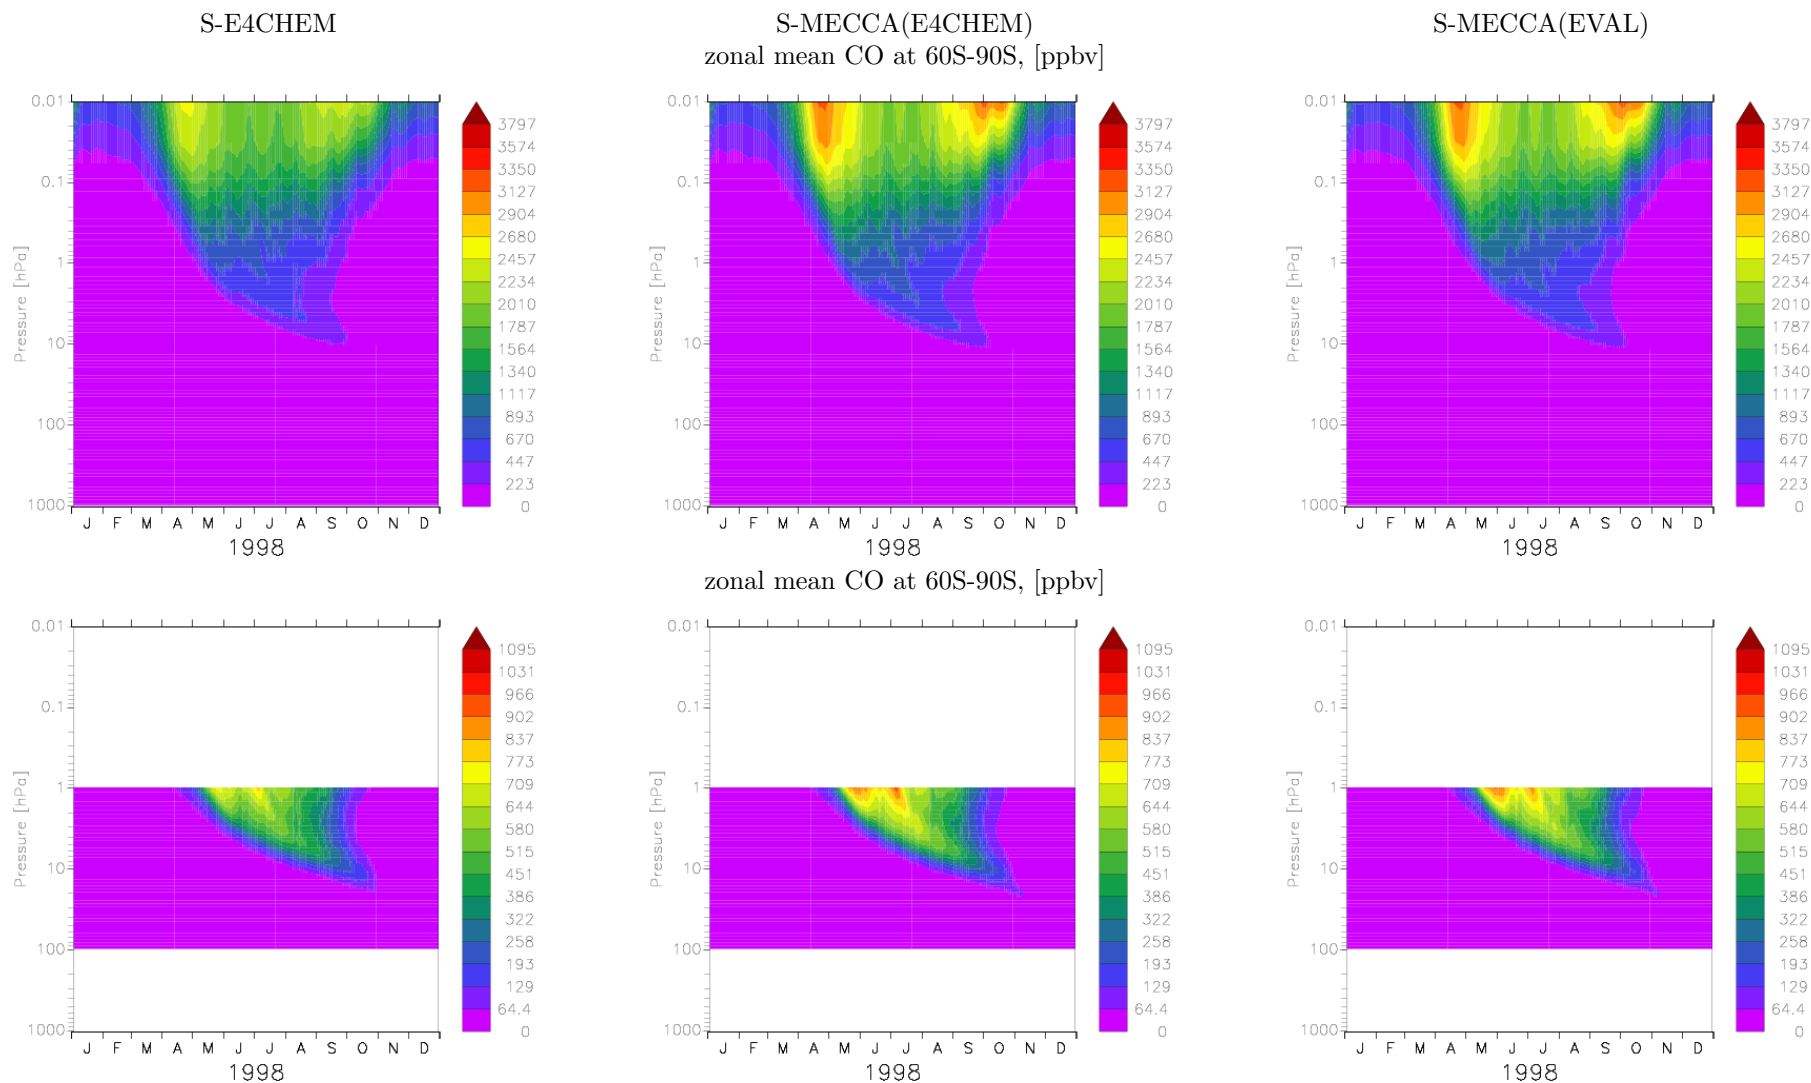

## 5 Species: H<sub>2</sub>O

S-E4CHEM

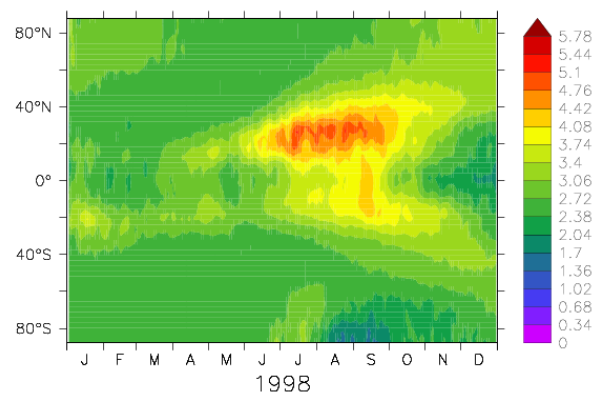S-MECCA(E4CHEM)  
zonal mean H<sub>2</sub>O at 100 hPa, [ppmv]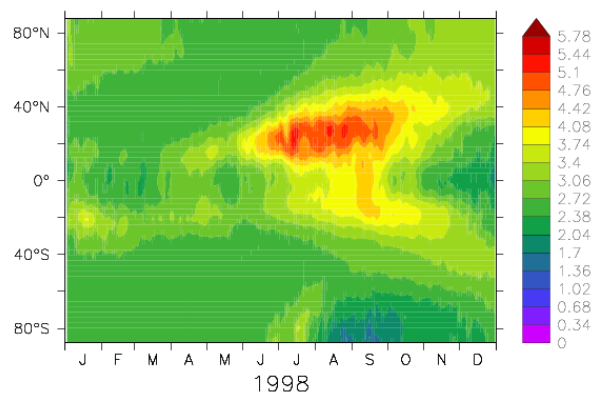

S-MECCA(EVAL)

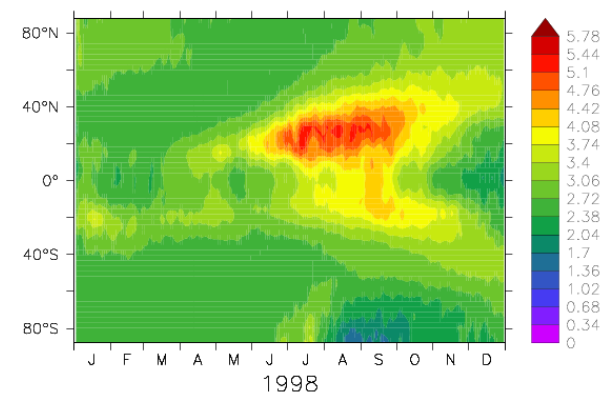zonal mean H<sub>2</sub>O at 50 hPa, [ppbv]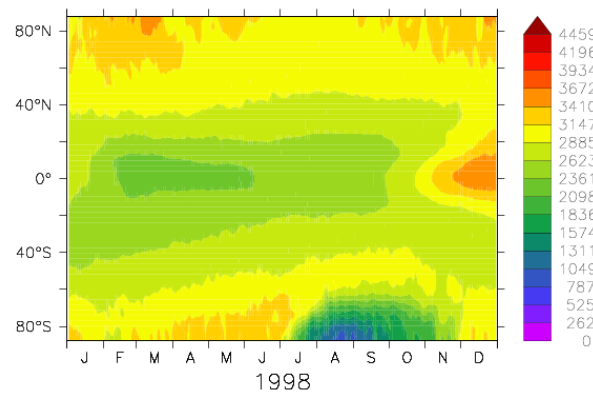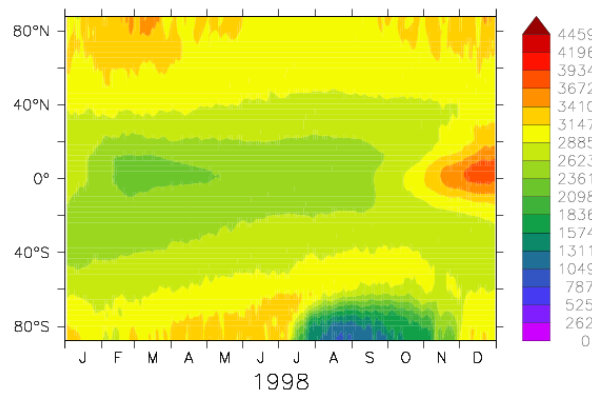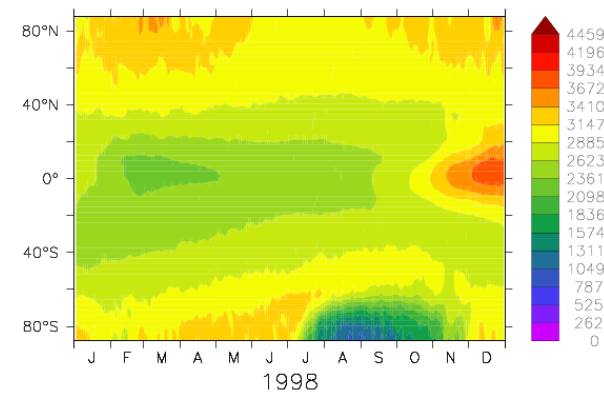

S-E4CHEM

S-MECCA(E4CHEM)  
zonal mean H<sub>2</sub>O at 10 hPa, [ppmv]

S-MECCA(EVAL)

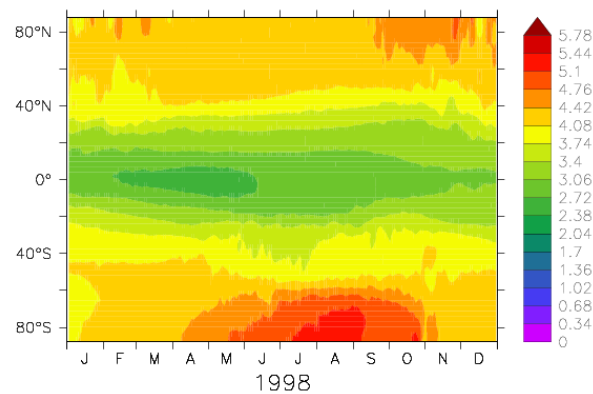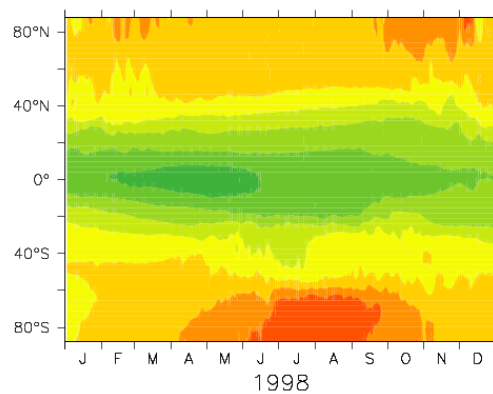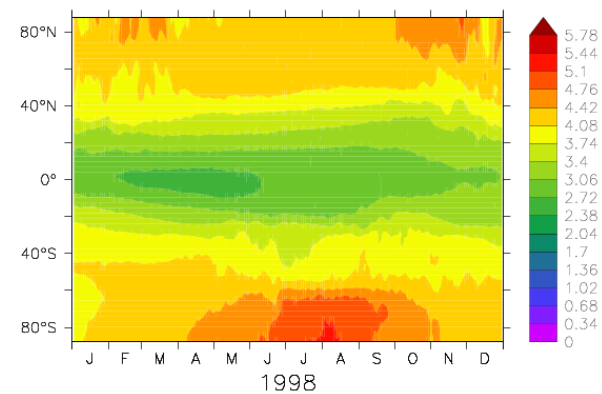zonal mean H<sub>2</sub>O at 1 hPa, [ppmv]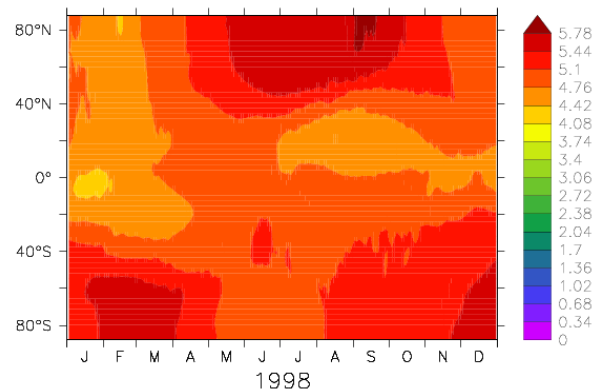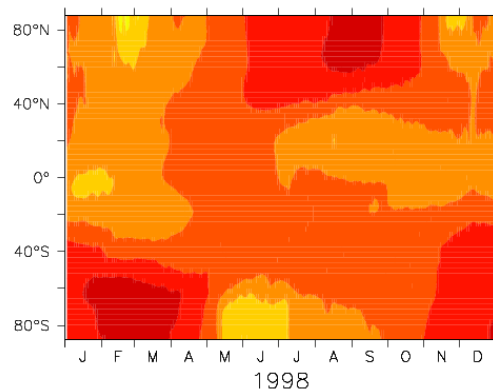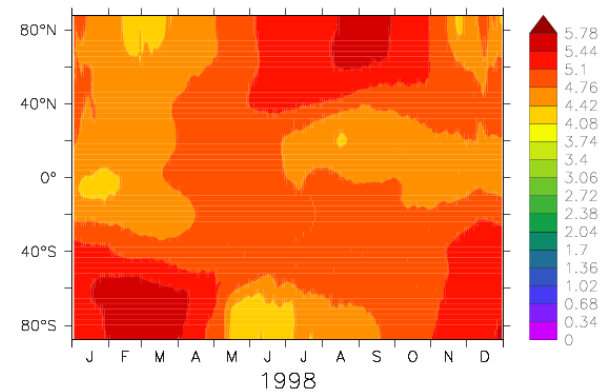



S-E4CHEM

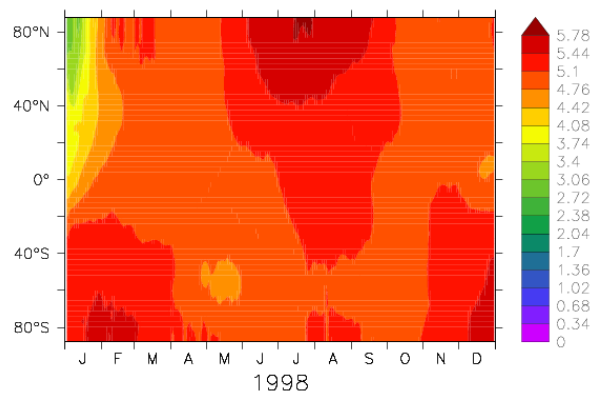S-MECCA(E4CHEM)  
zonal mean H<sub>2</sub>O at 0.1 hPa, [ppmv]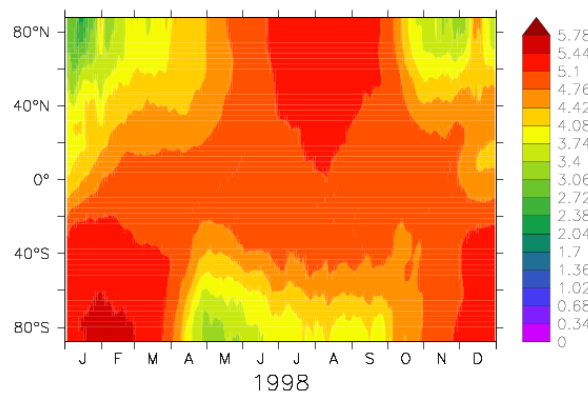

S-MECCA(EVAL)

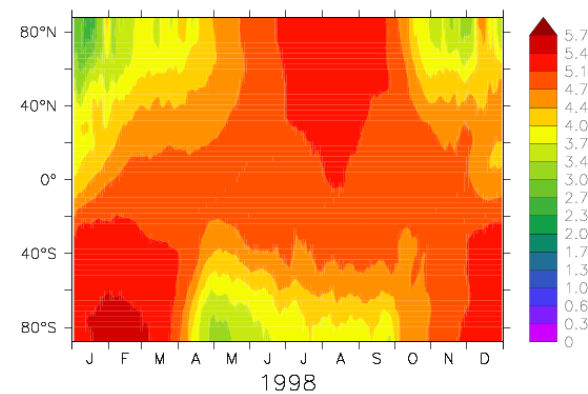zonal mean H<sub>2</sub>O at t=1-Jan-1998:31-Dec-1998, [ppmv]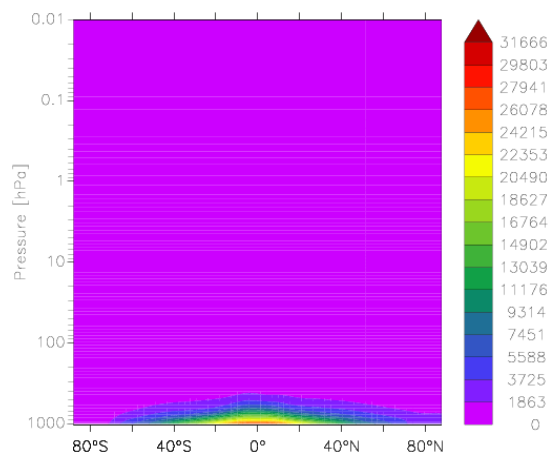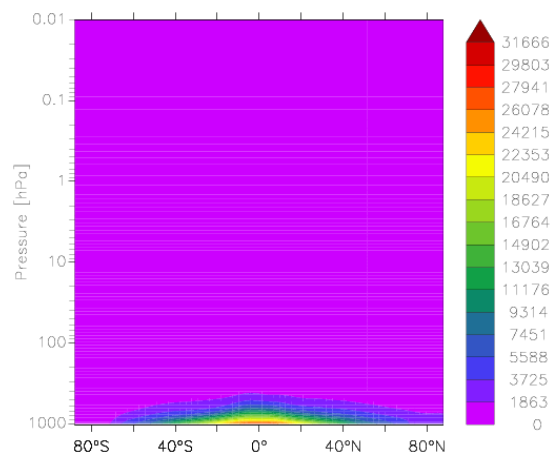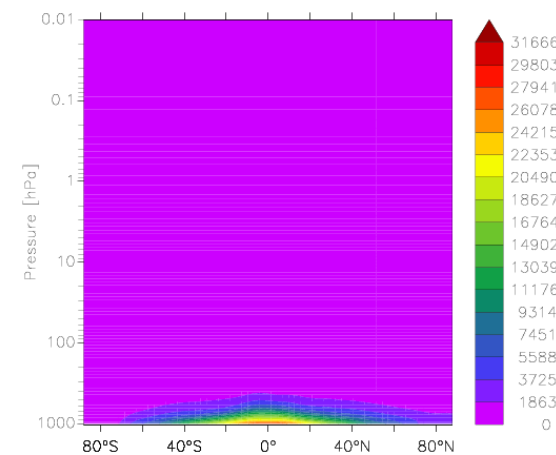

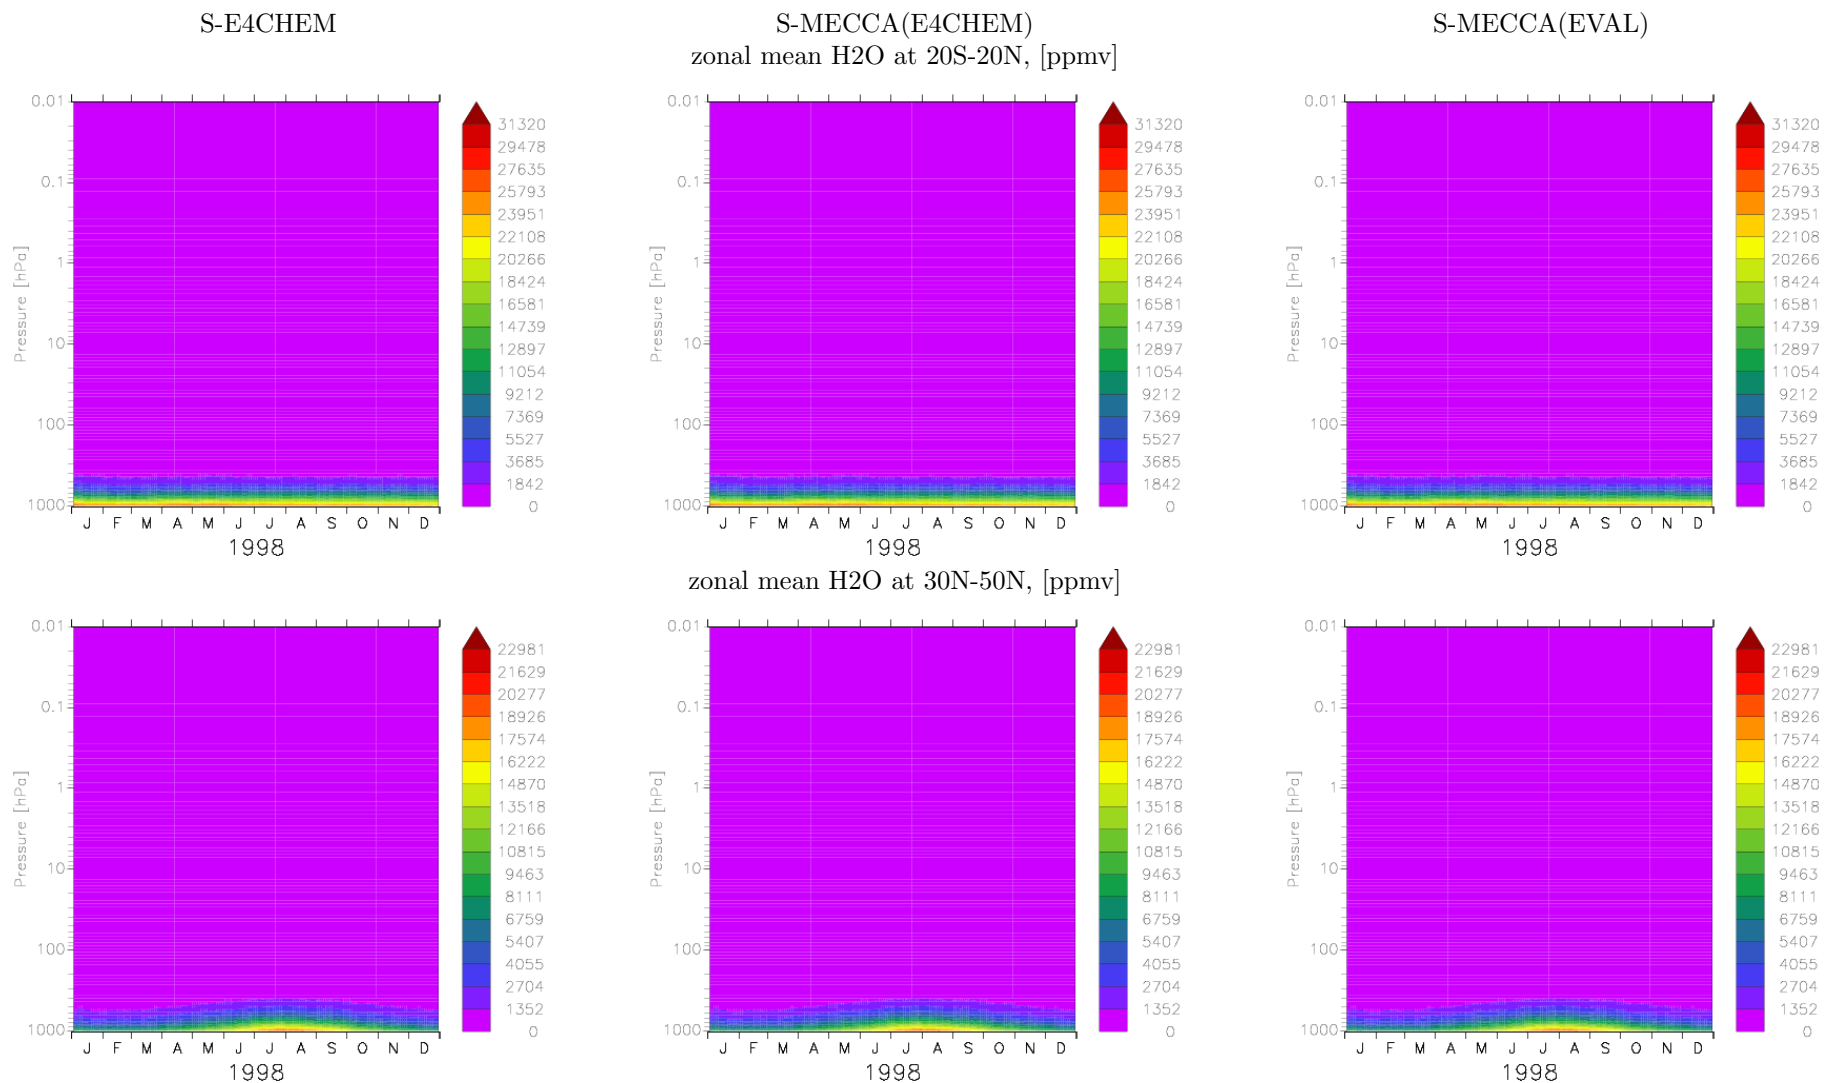

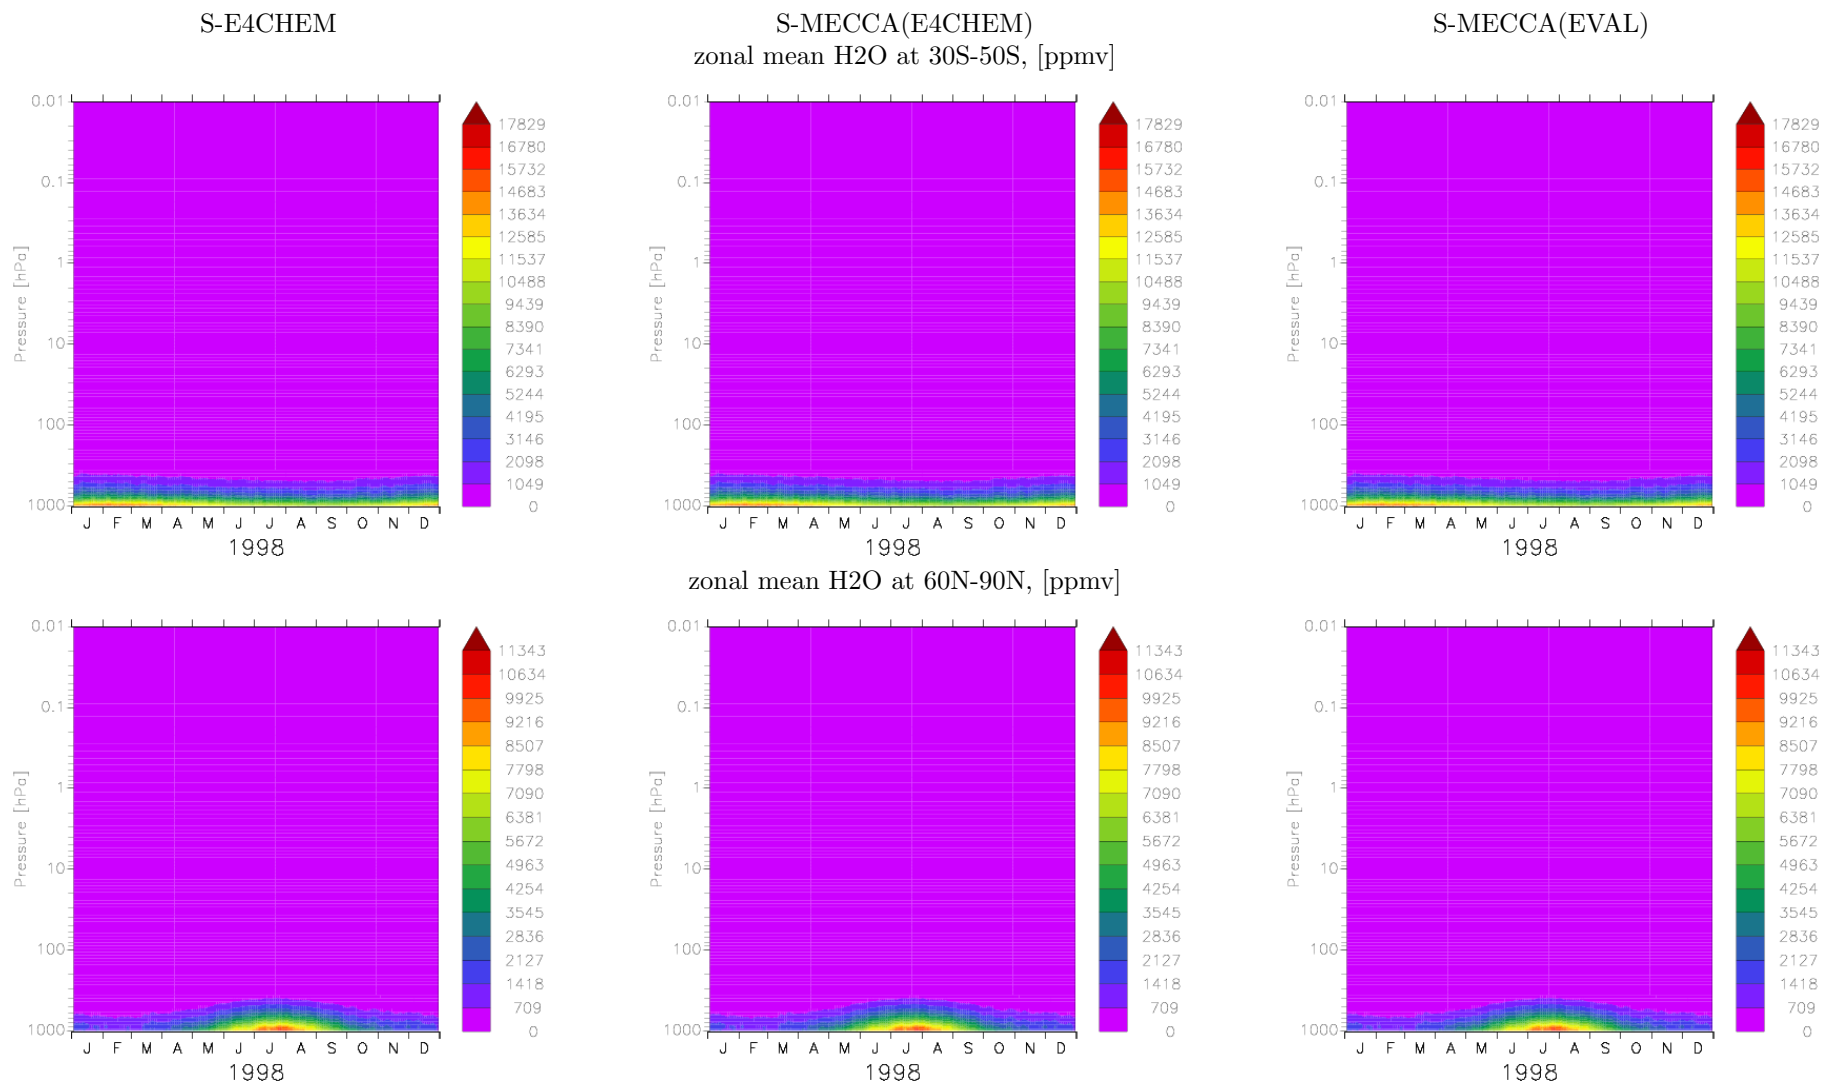



## 6 Species: $\text{HNO}_3$

S-E4CHEM

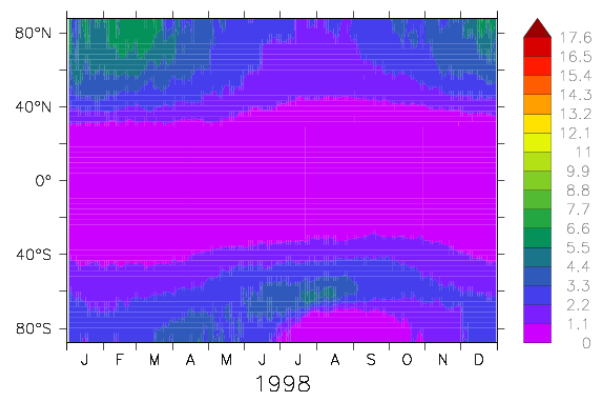S-MECCA(E4CHEM)  
zonal mean  $\text{HNO}_3$  at 100 hPa, [ppbv]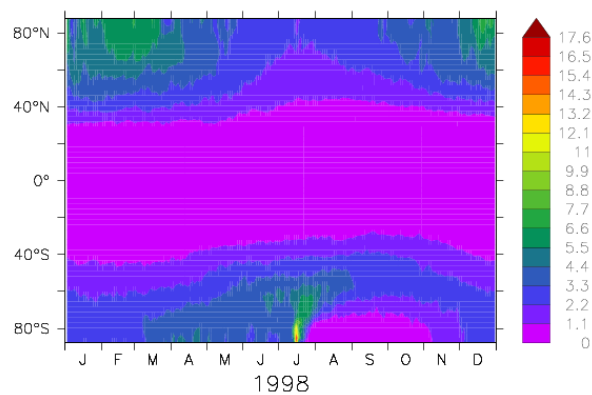

S-MECCA(EVAL)

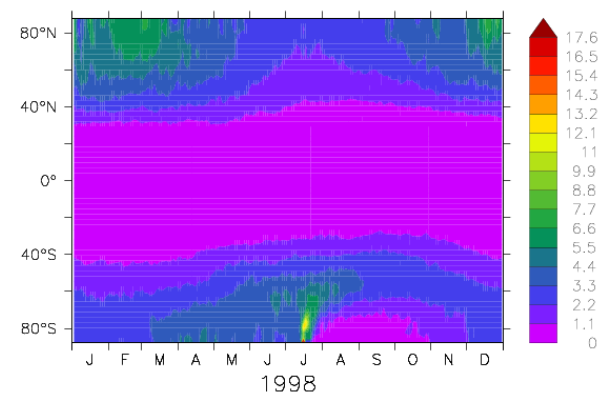zonal mean  $\text{HNO}_3$  at 50 hPa, [ppbv]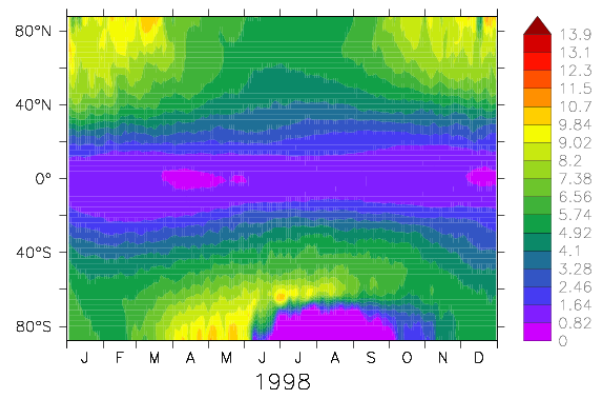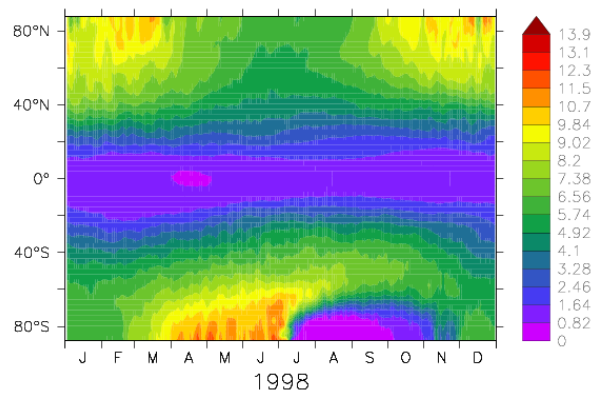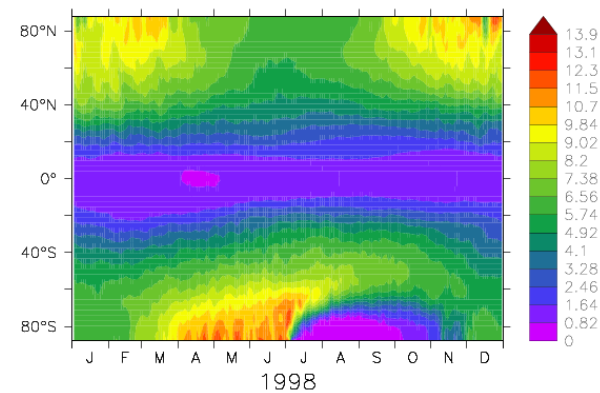

S-E4CHEM

S-MECCA(E4CHEM)  
zonal mean HNO<sub>3</sub> at 10 hPa, [ppbv]

S-MECCA(EVAL)

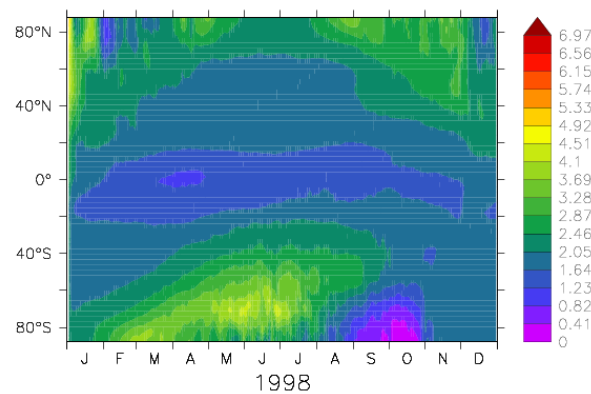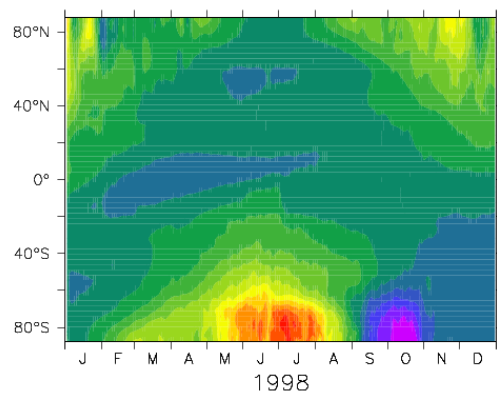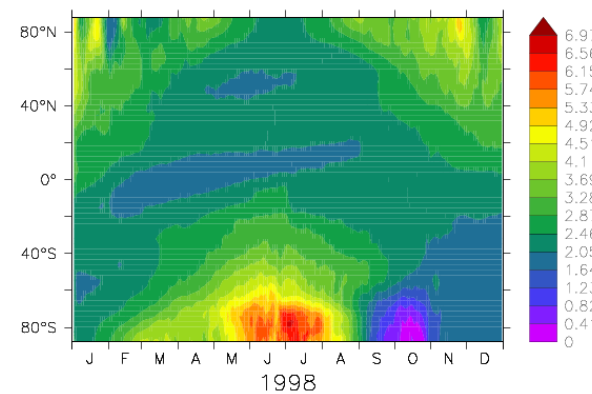zonal mean HNO<sub>3</sub> at 1 hPa, [pptv]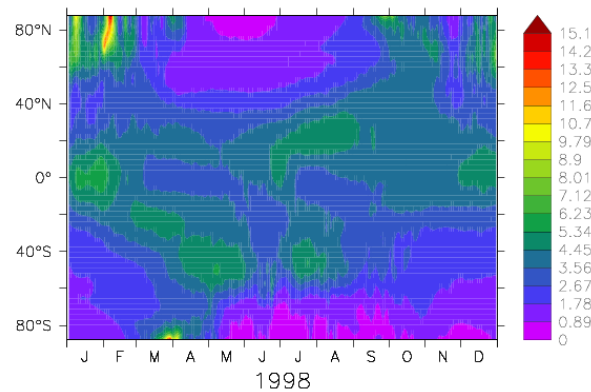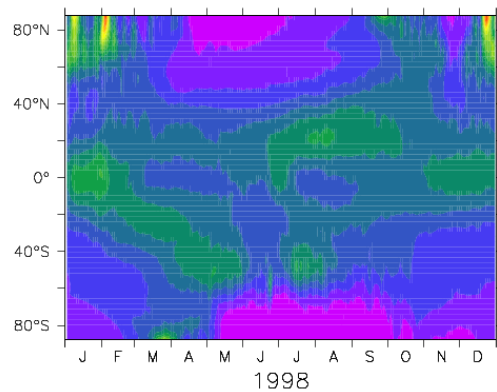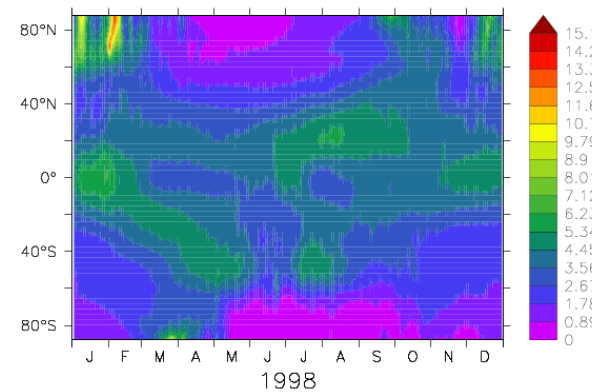

S-E4CHEM

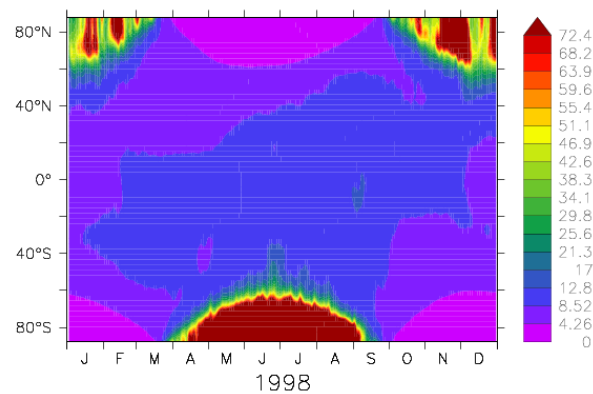S-MECCA(E4CHEM)  
zonal mean HNO<sub>3</sub> at 0.1 hPa, [ppqv]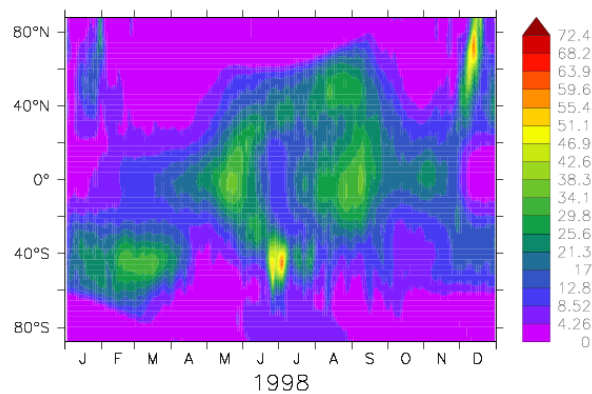

S-MECCA(EVAL)

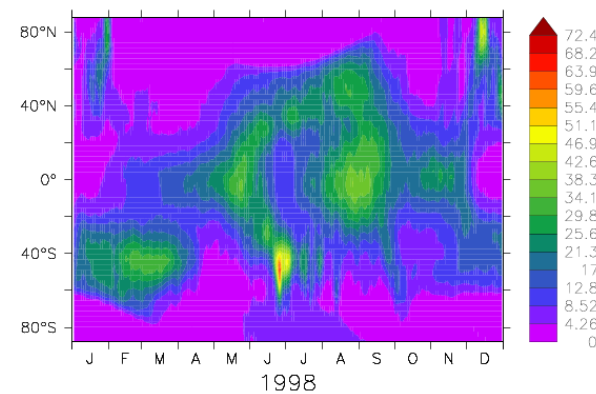zonal mean HNO<sub>3</sub> at t=1-Jan-1998:31-Dec-1998, [ppbv]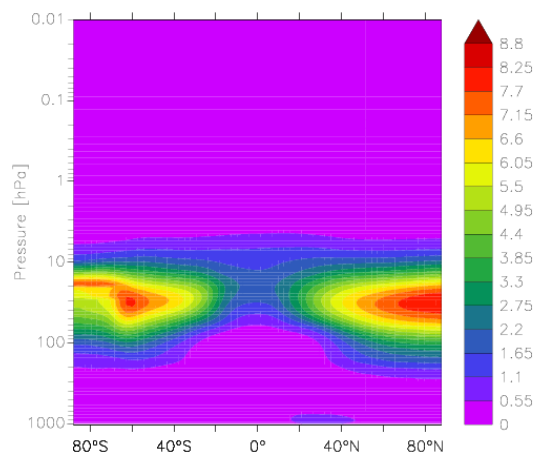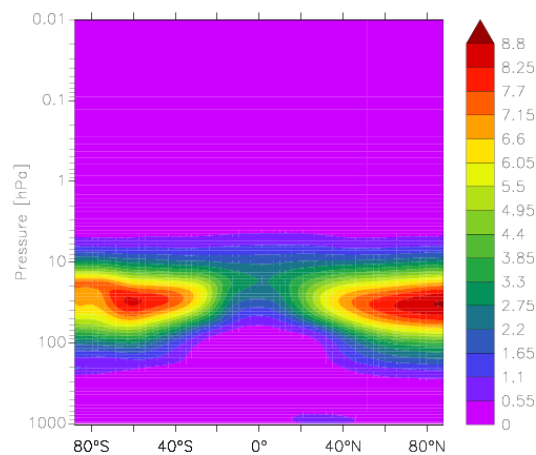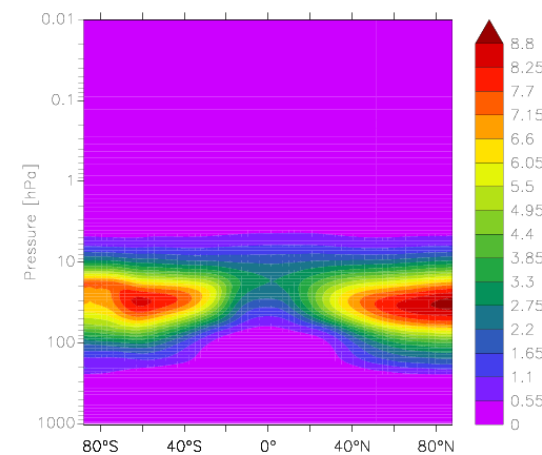

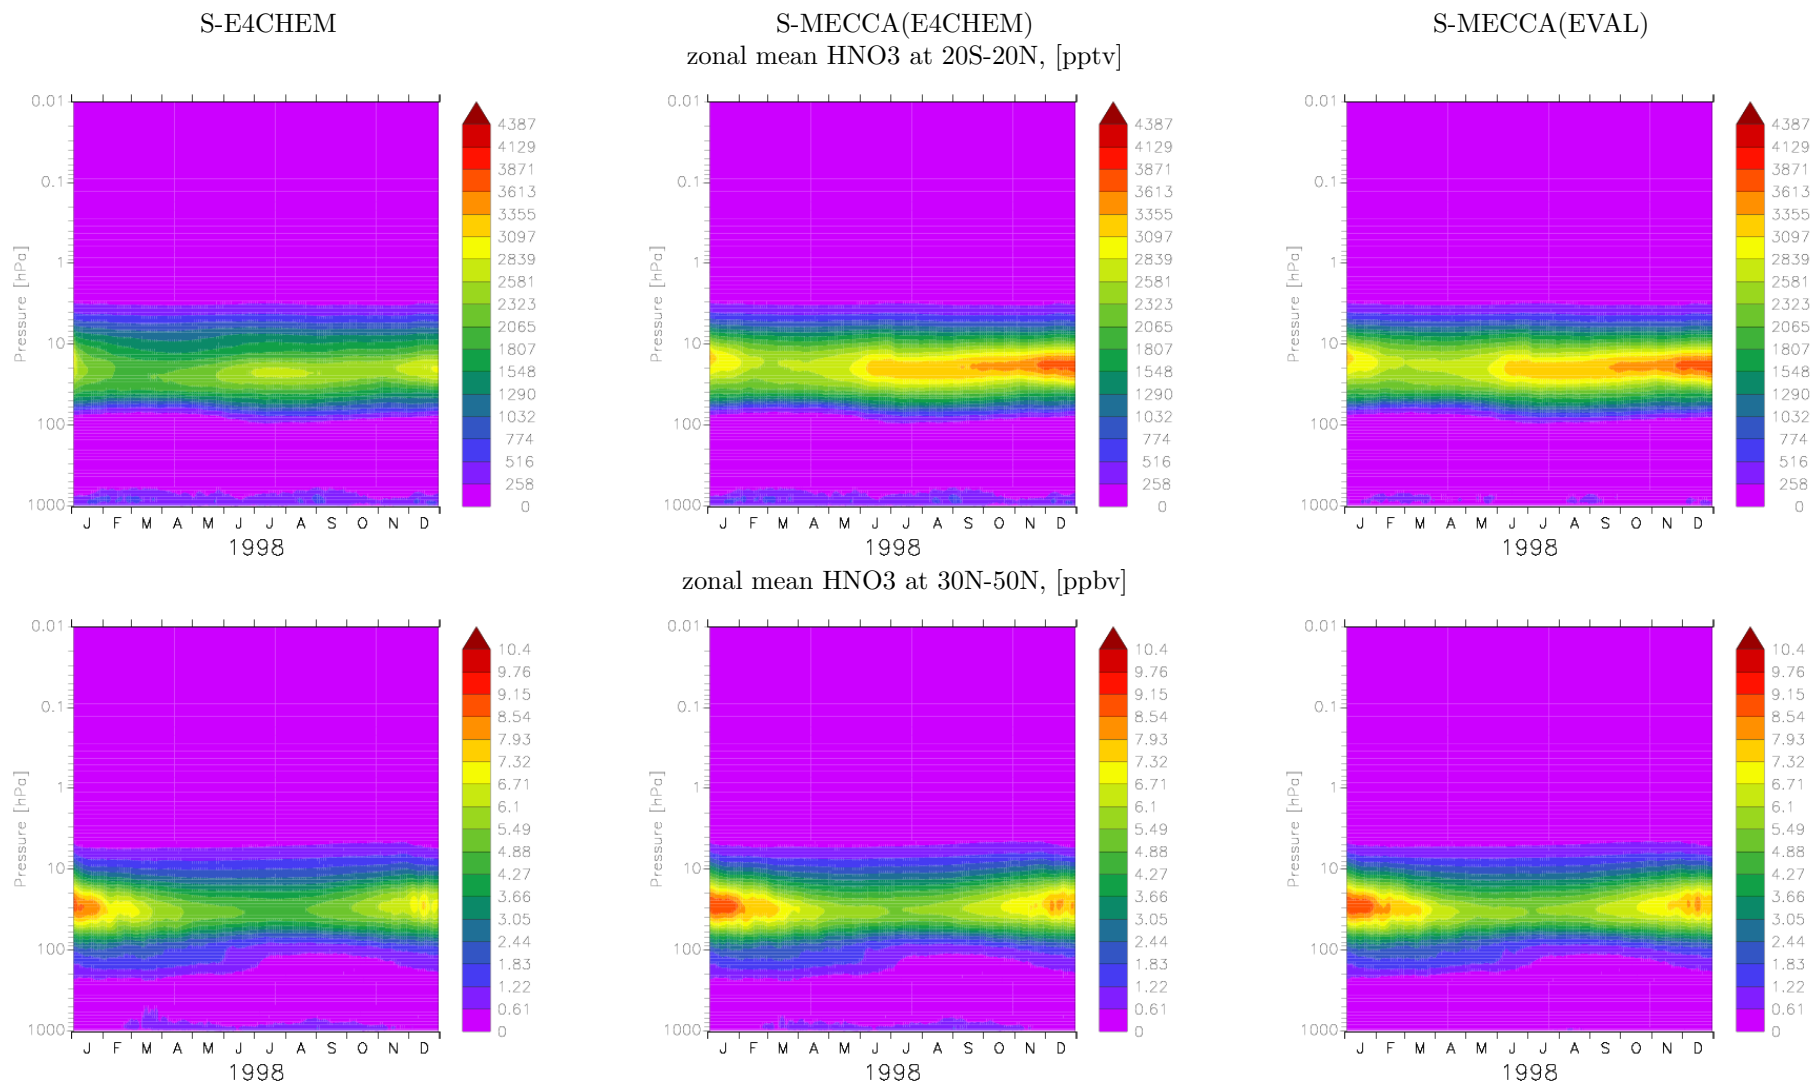



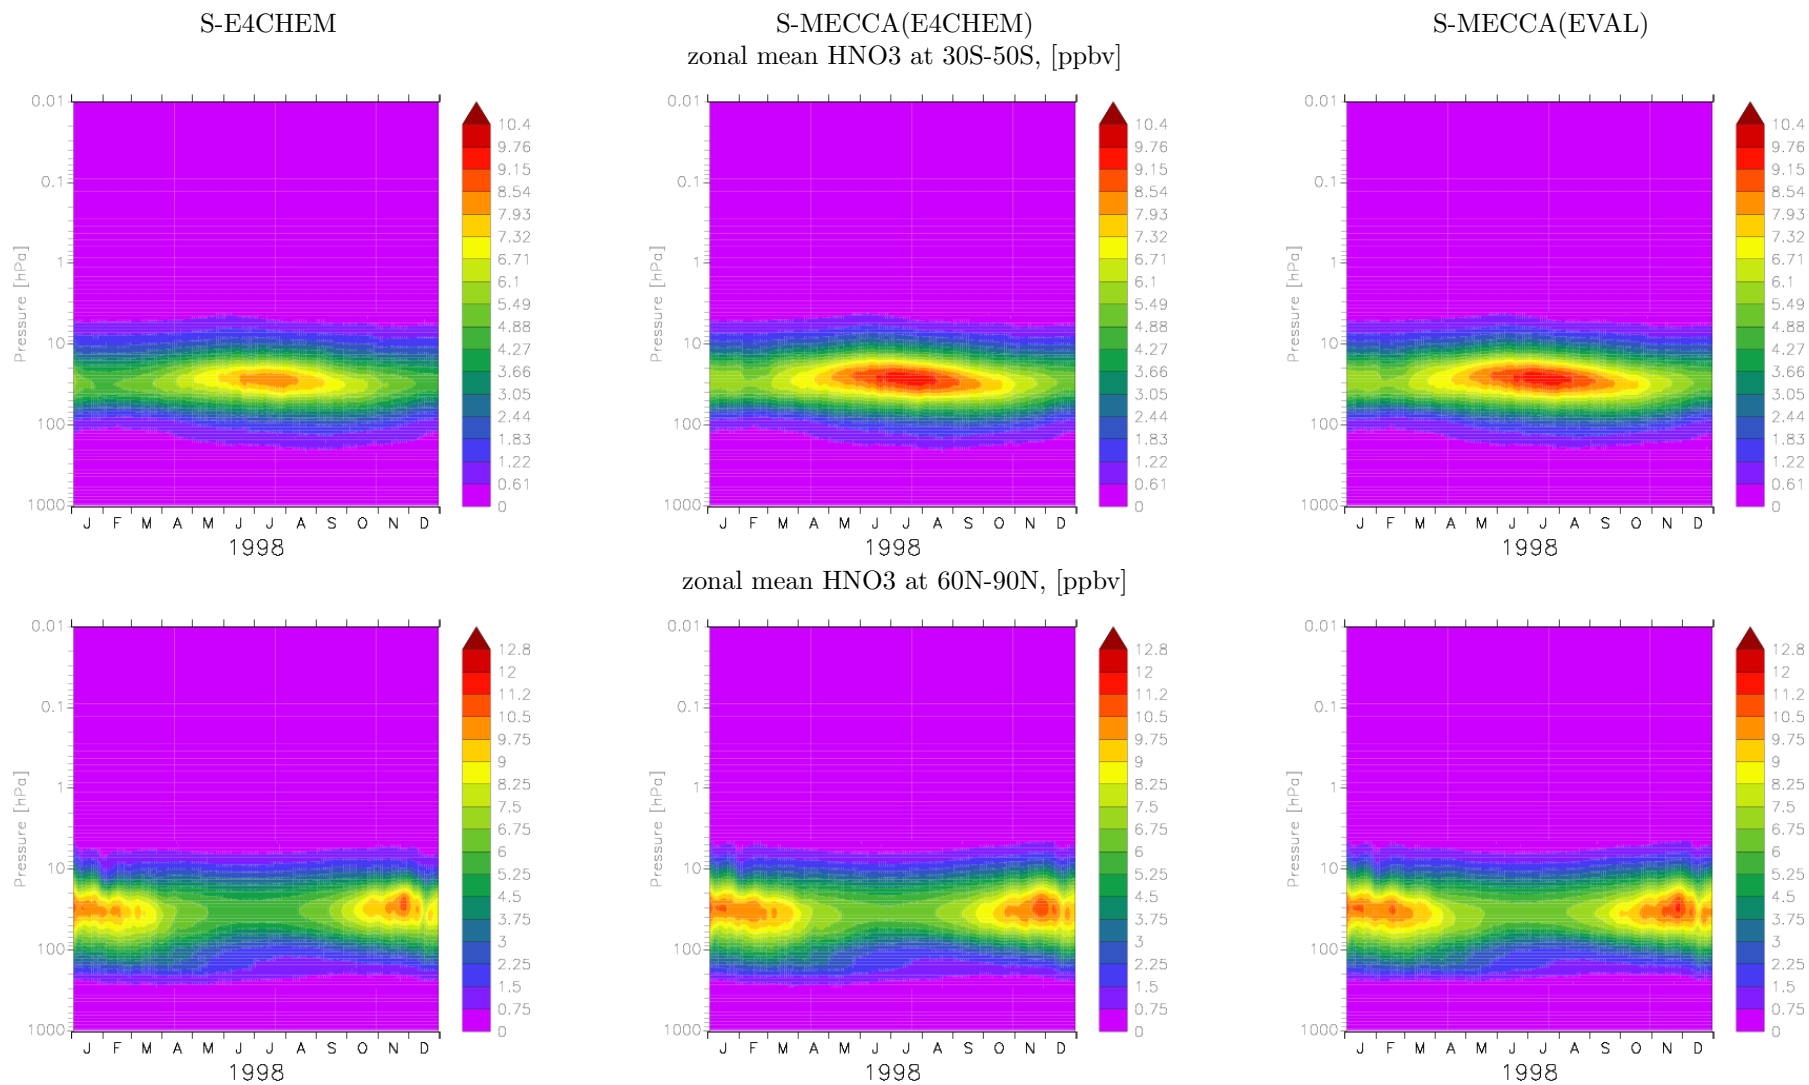

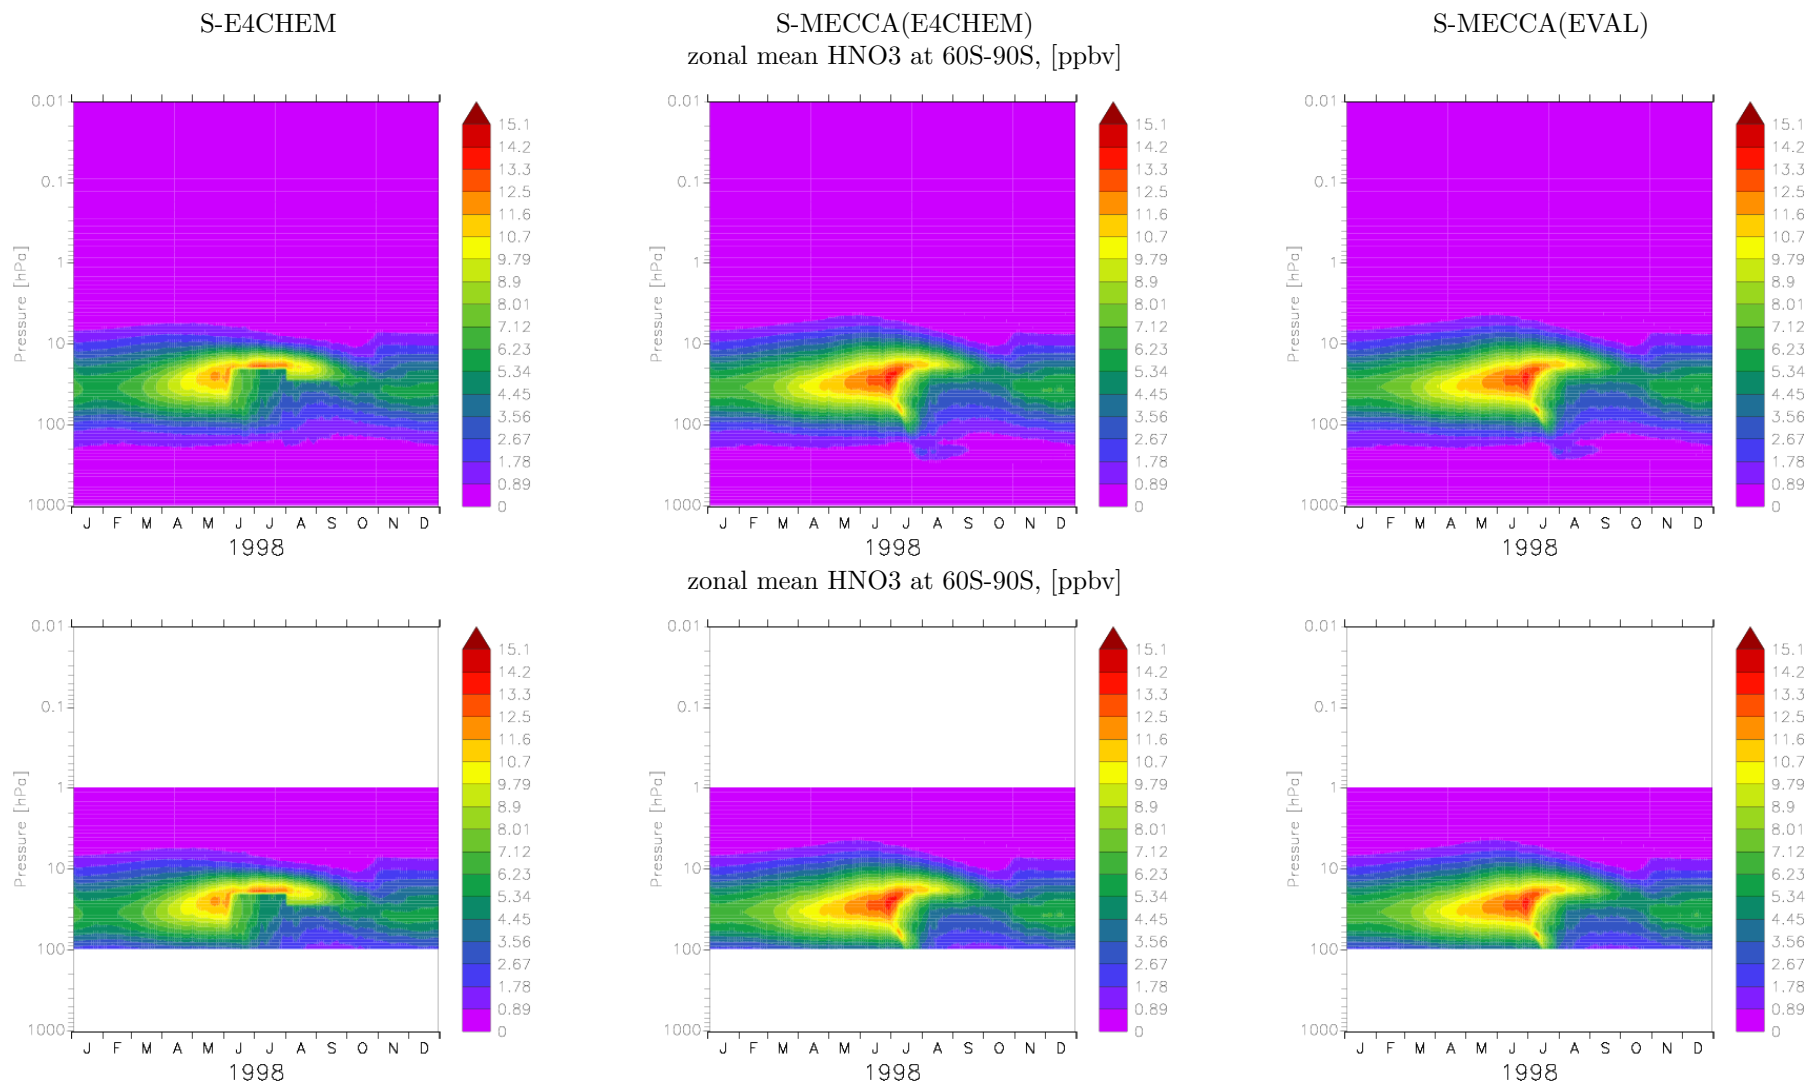

## 7 Species: HOCl

S-E4CHEM

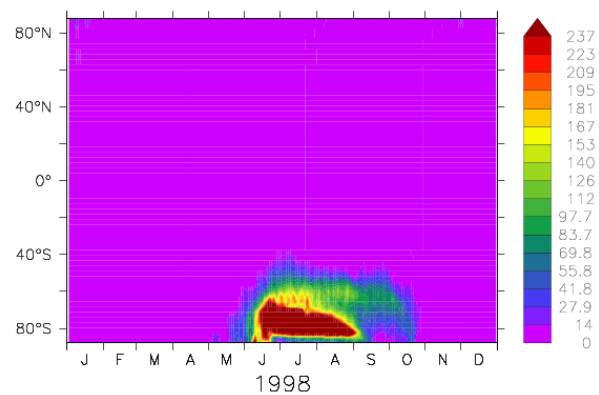S-MECCA(E4CHEM)  
zonal mean HOCl at 100 hPa, [pptv]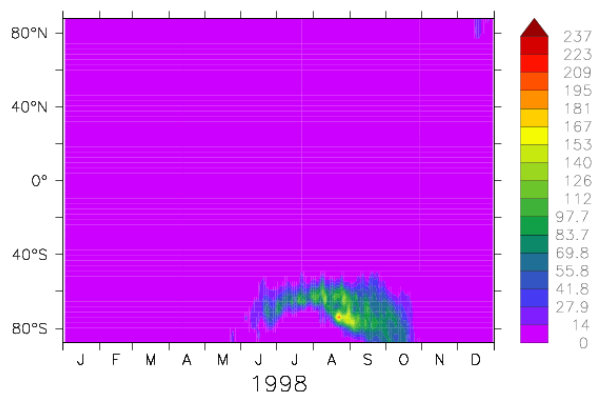

S-MECCA(EVAL)

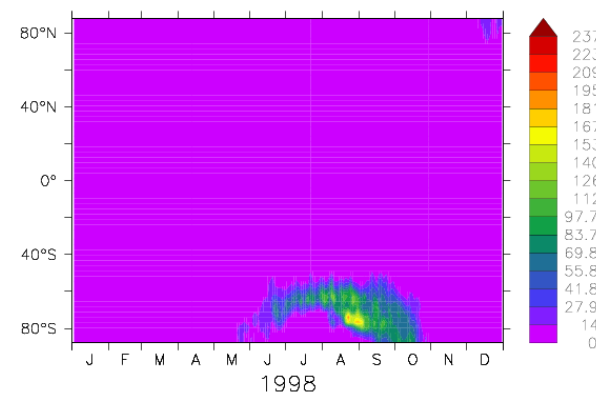

zonal mean HOCl at 50 hPa, [pptv]

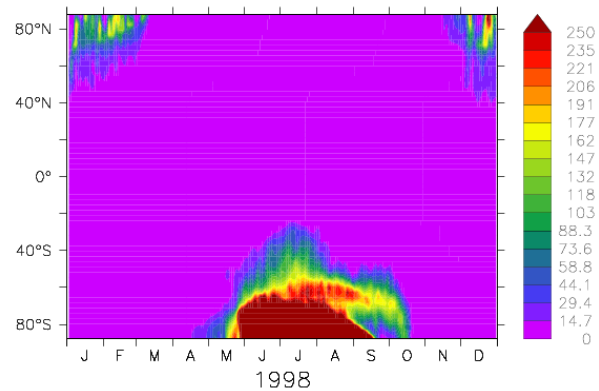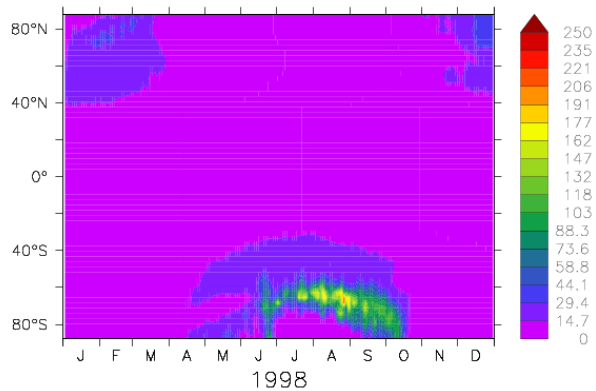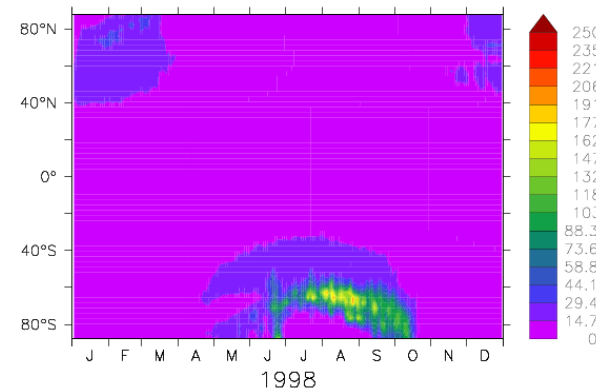

S-E4CHEM

S-MECCA(E4CHEM)  
zonal mean HOCl at 10 hPa, [pptv]

S-MECCA(EVAL)

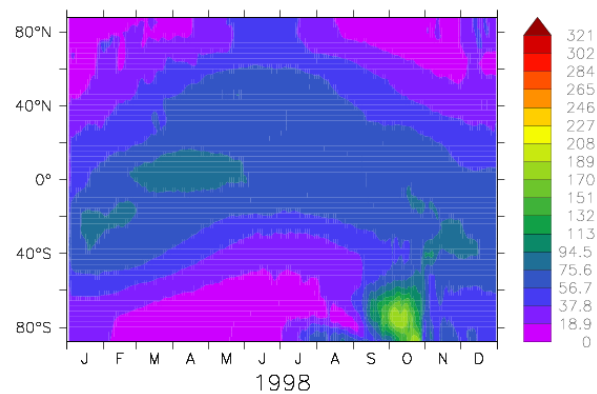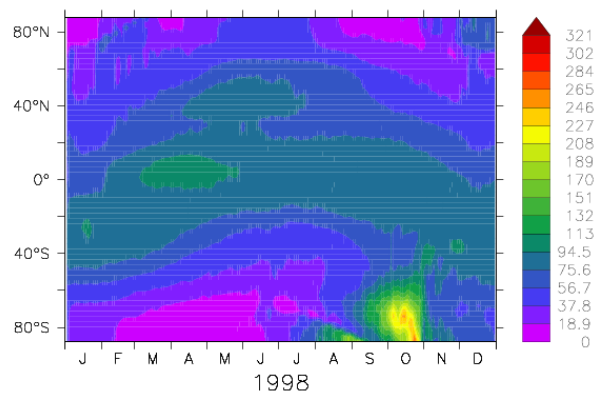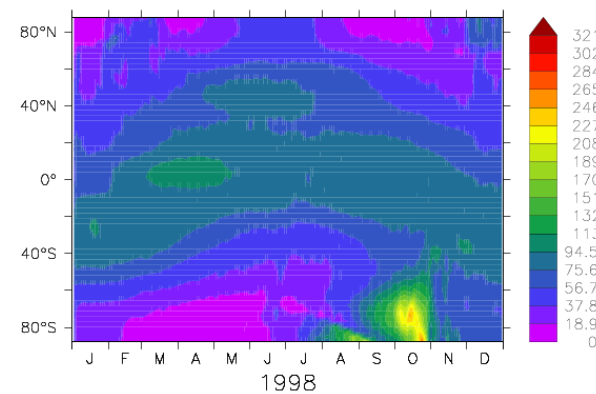

zonal mean HOCl at 1 hPa, [pptv]

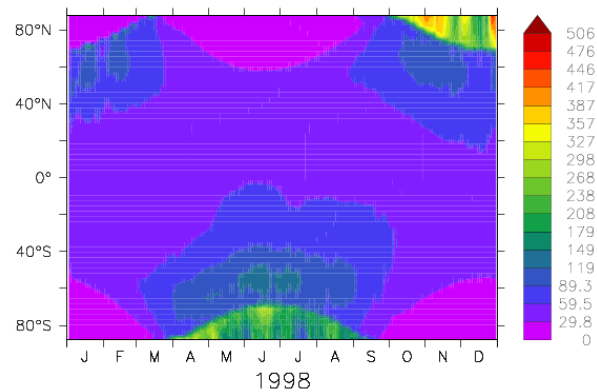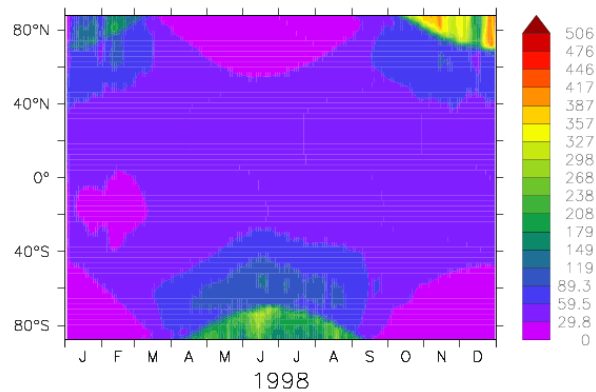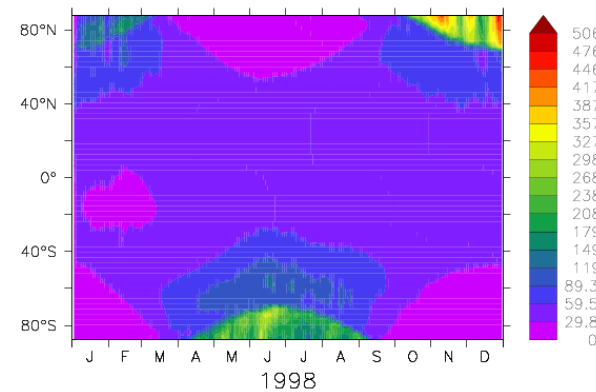

S-E4CHEM

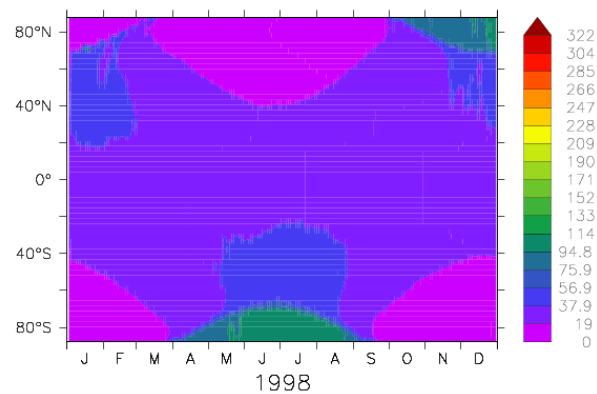S-MECCA(E4CHEM)  
zonal mean HOCl at 0.1 hPa, [pptv]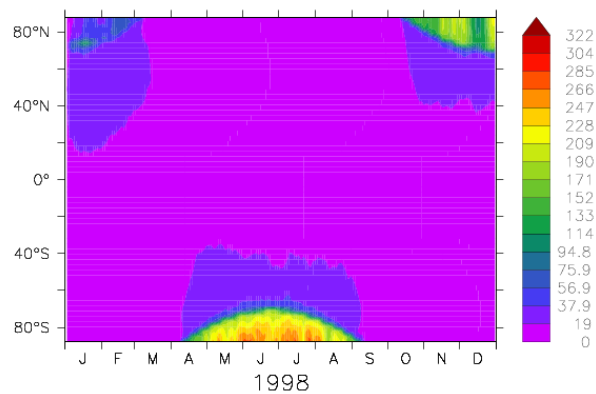

S-MECCA(EVAL)

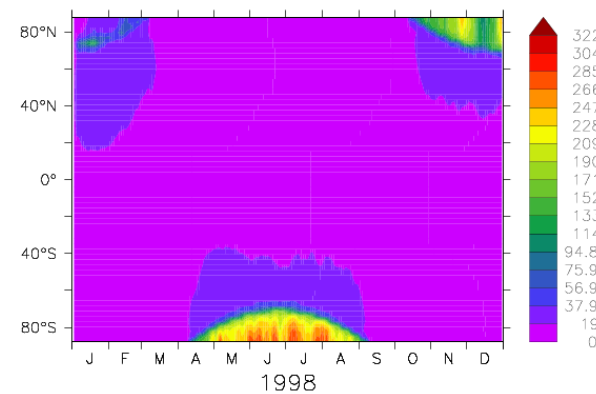

zonal mean HOCl at t=1-Jan-1998:31-Dec-1998, [pptv]

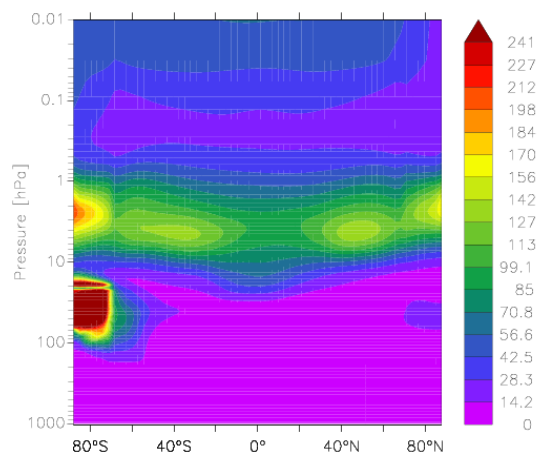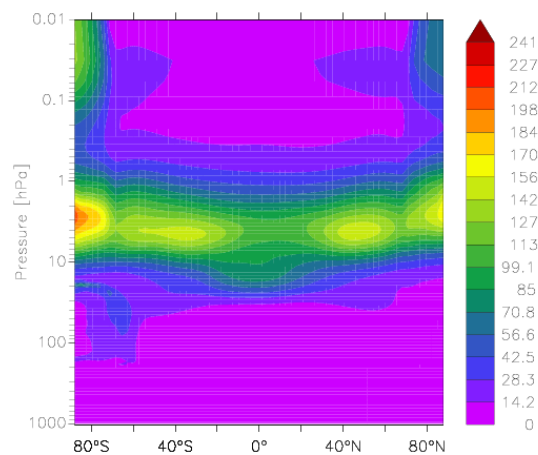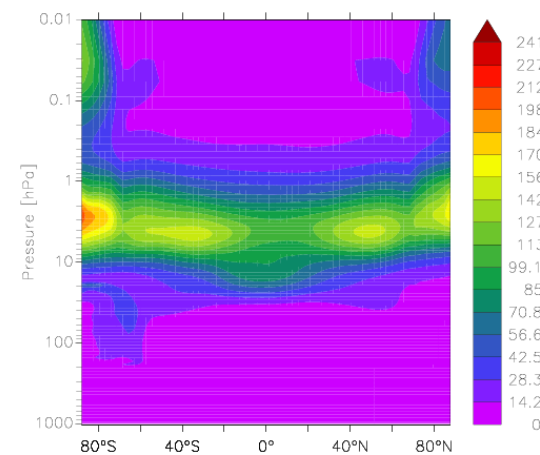

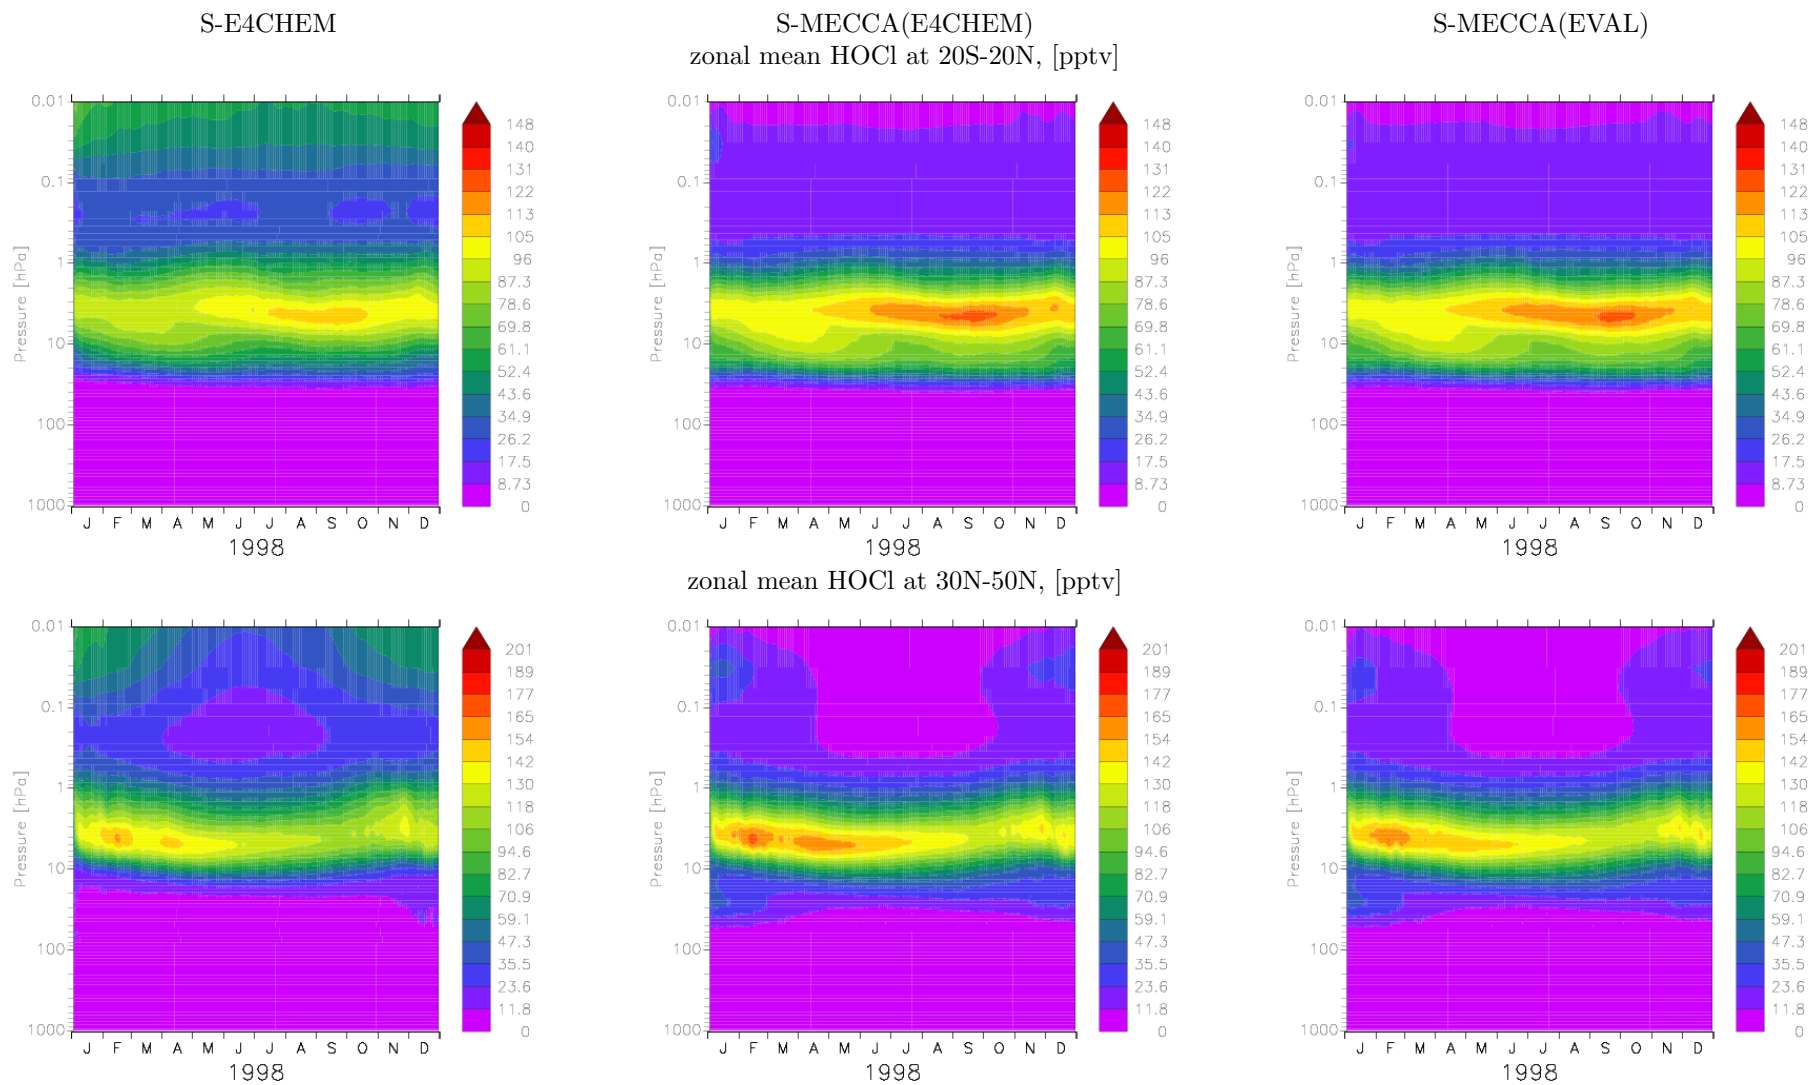

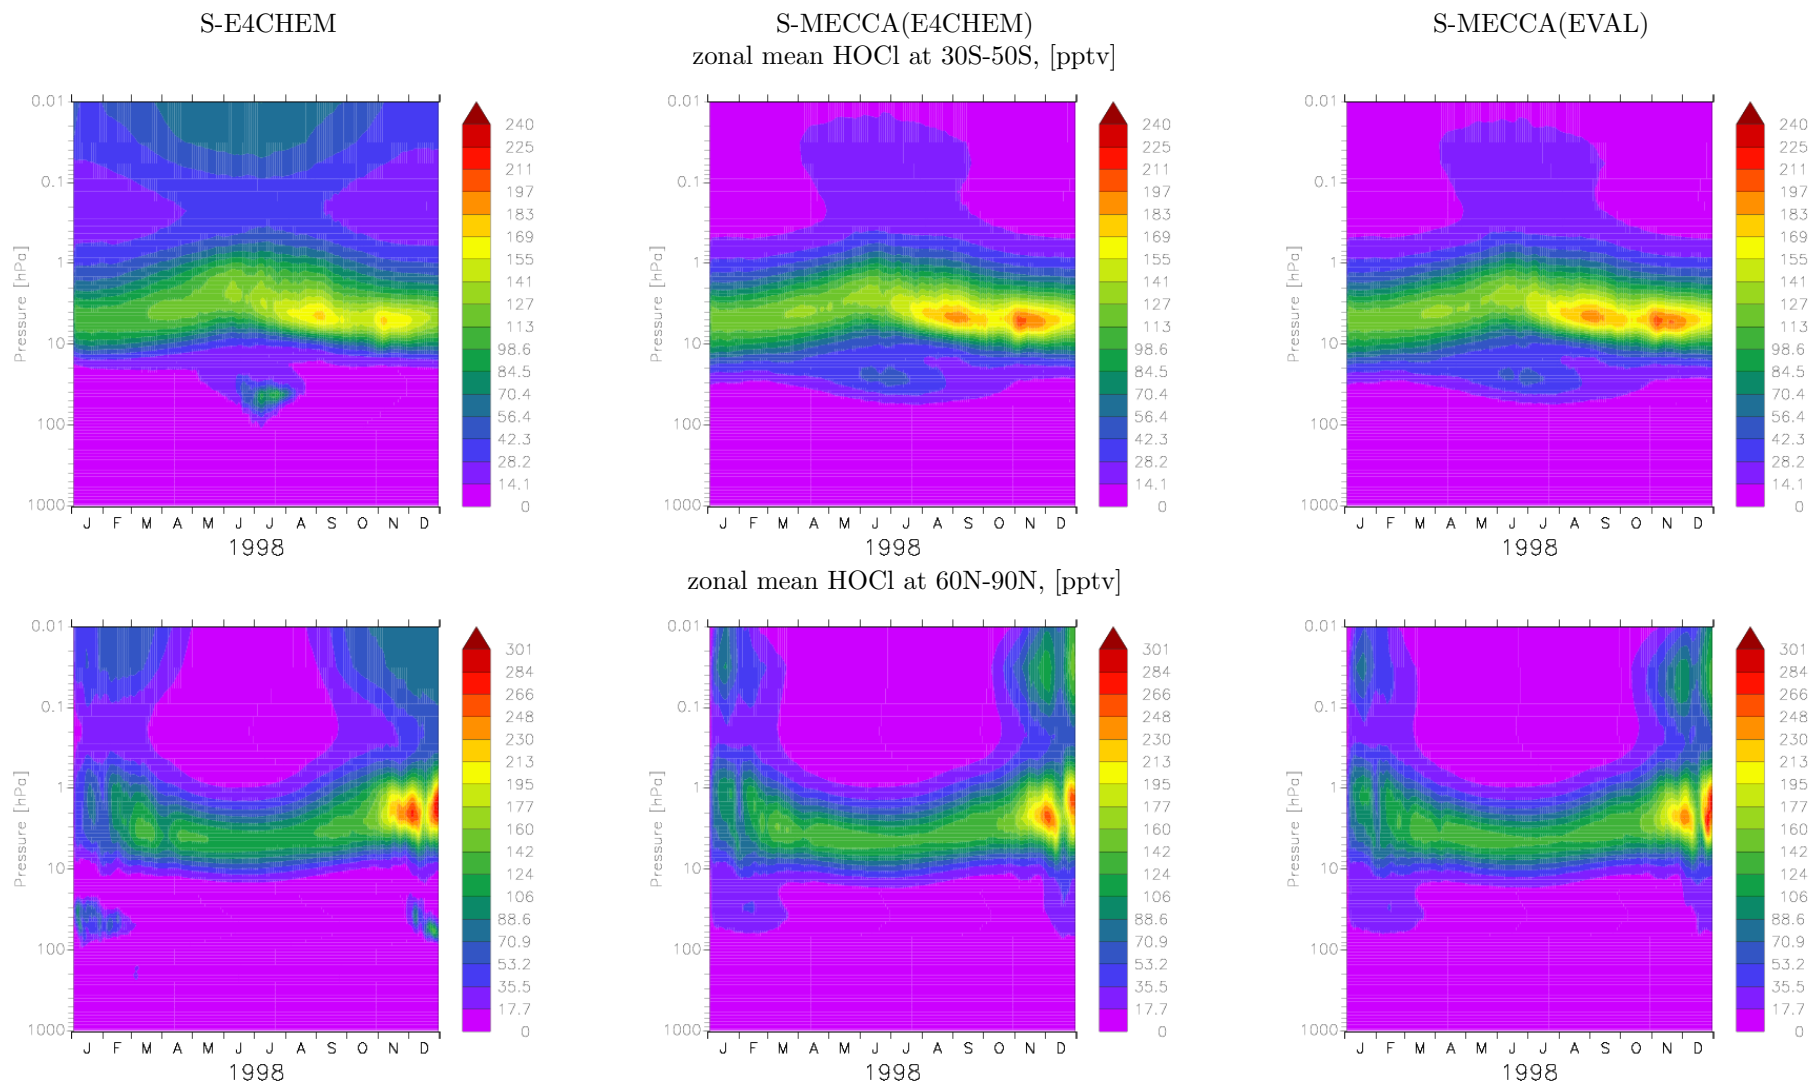

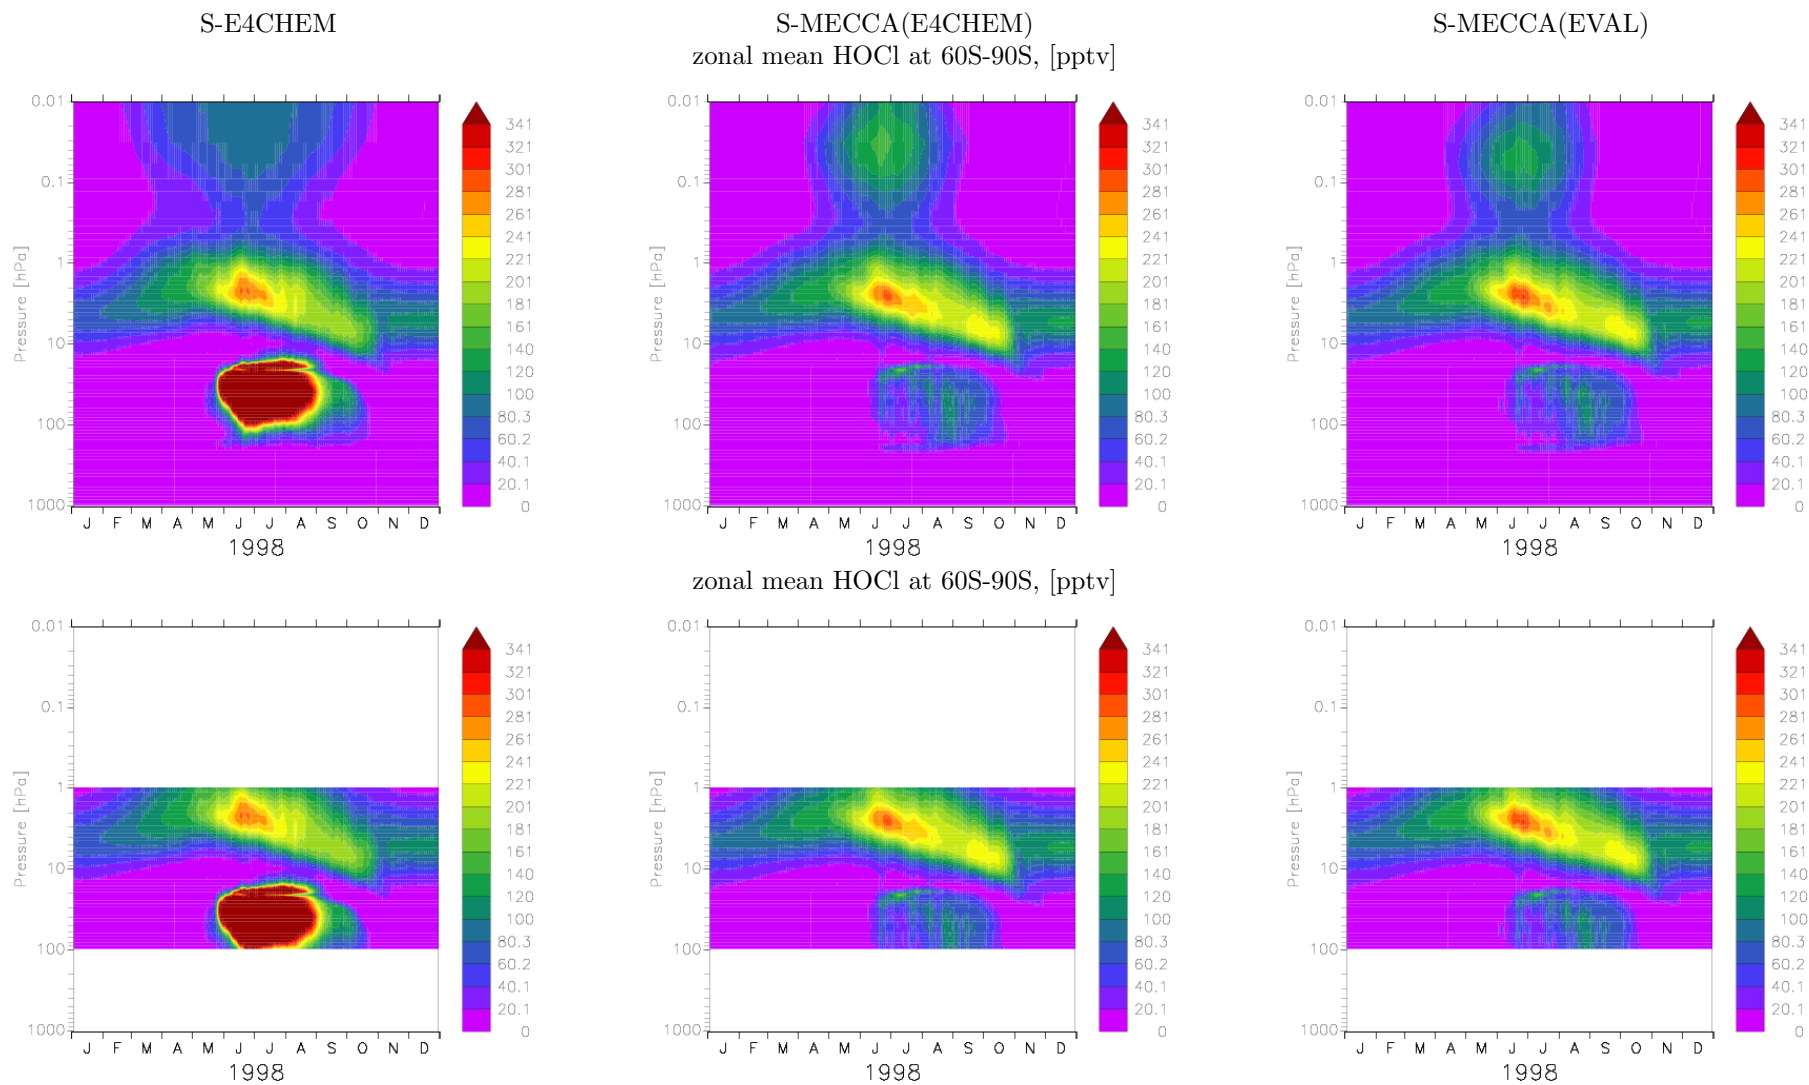



## 8 Species: $\text{N}_2\text{O}_5$

S-E4CHEM

S-MECCA(E4CHEM)  
zonal mean  $\text{N}_2\text{O}_5$  at 100 hPa, [pptv]

S-MECCA(EVAL)

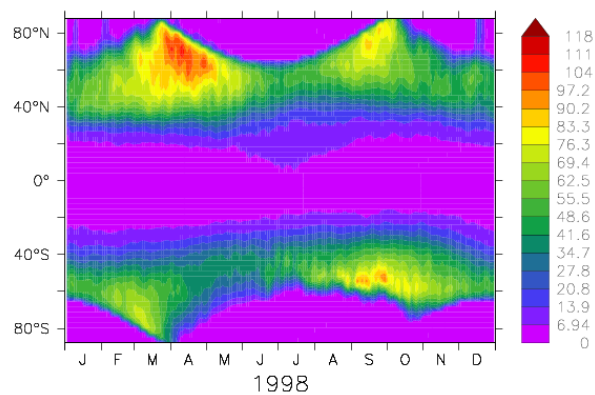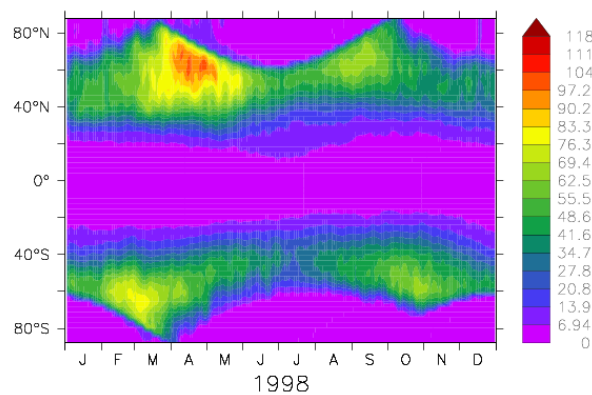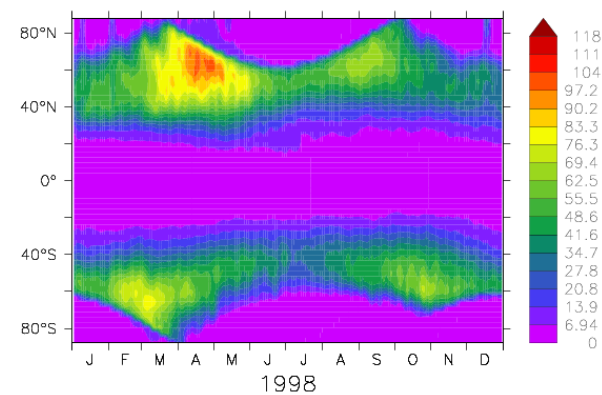zonal mean  $\text{N}_2\text{O}_5$  at 50 hPa, [pptv]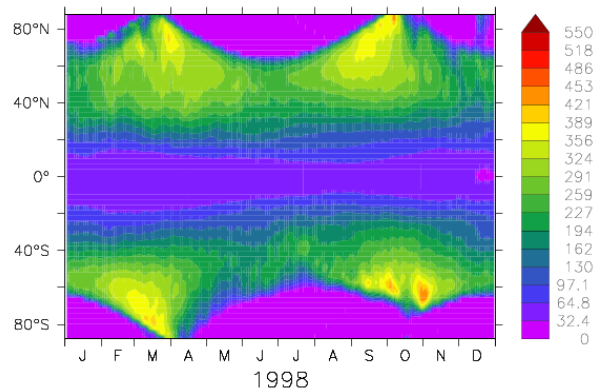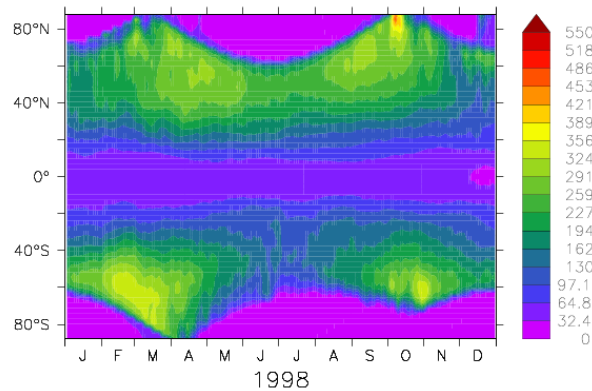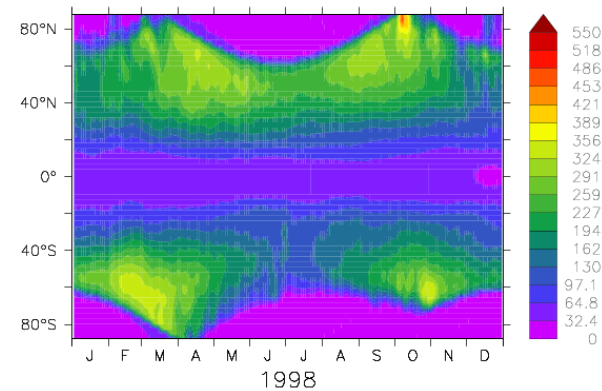

S-E4CHEM

S-MECCA(E4CHEM)  
zonal mean N<sub>2</sub>O<sub>5</sub> at 10 hPa, [ppbv]

S-MECCA(EVAL)

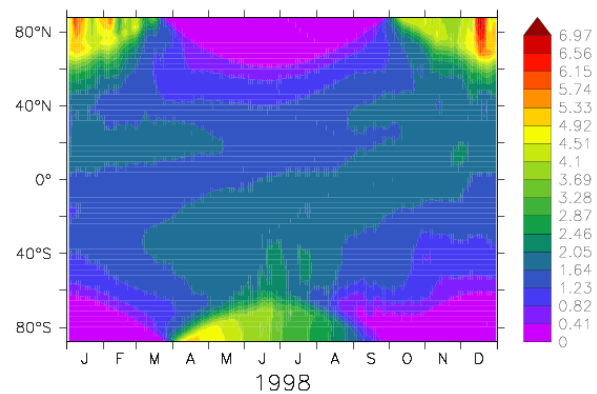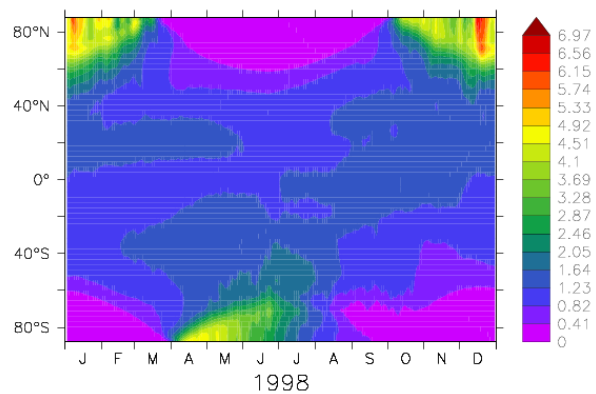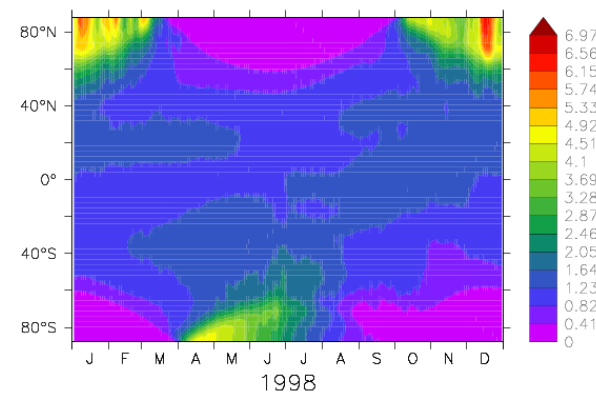zonal mean N<sub>2</sub>O<sub>5</sub> at 1 hPa, [pptv]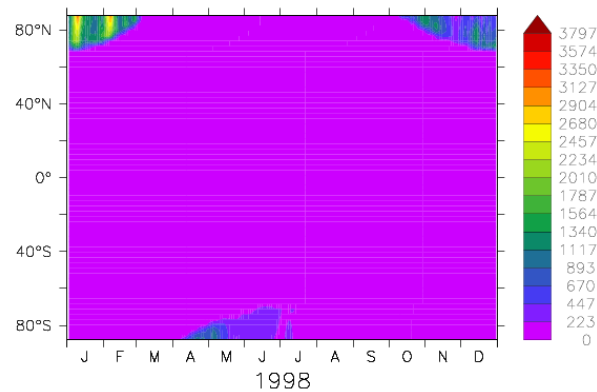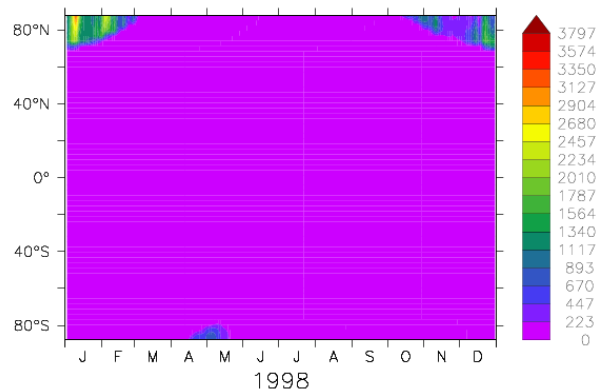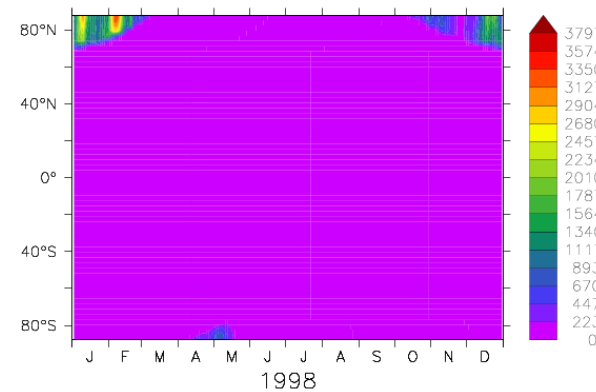

S-E4CHEM

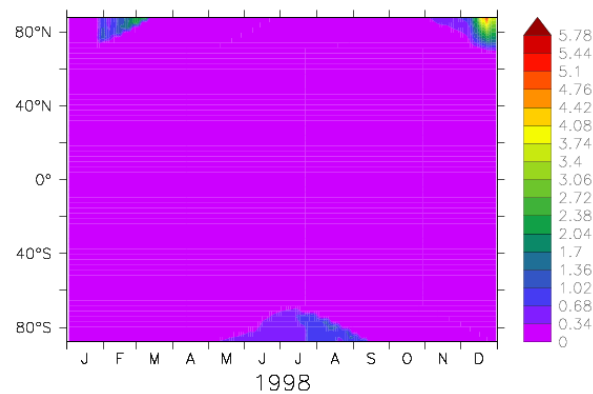S-MECCA(E4CHEM)  
zonal mean  $\text{N}_2\text{O}_5$  at 0.1 hPa, [pptv]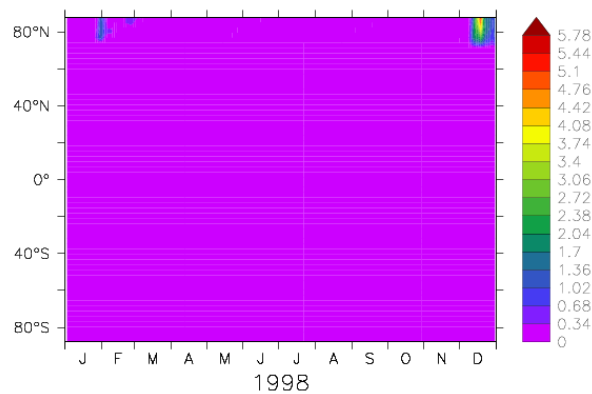

S-MECCA(EVAL)

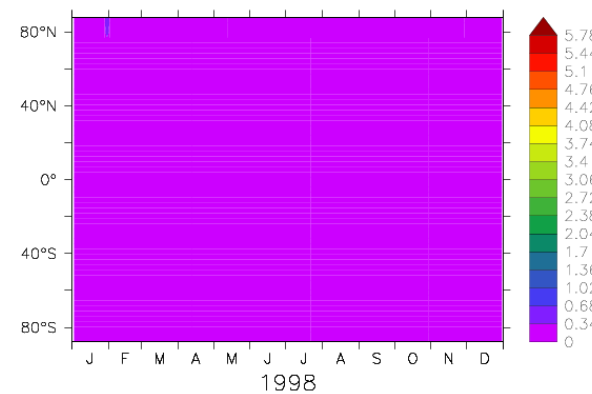zonal mean  $\text{N}_2\text{O}_5$  at t=1-Jan-1998:31-Dec-1998, [pptv]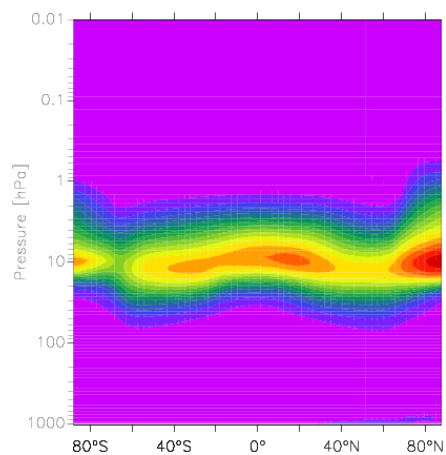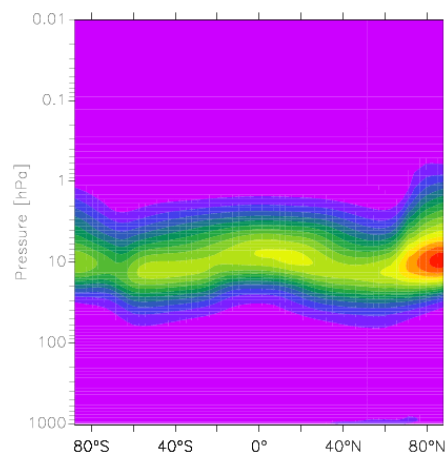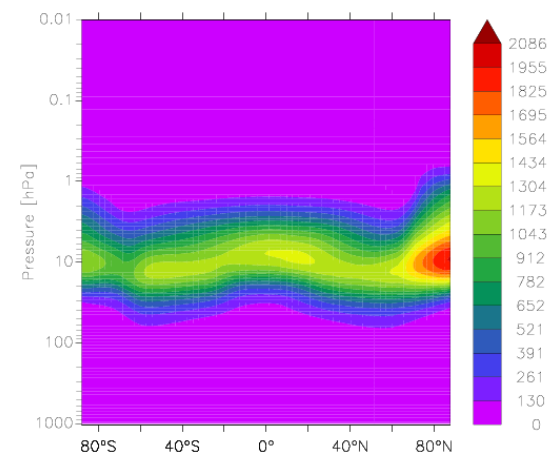

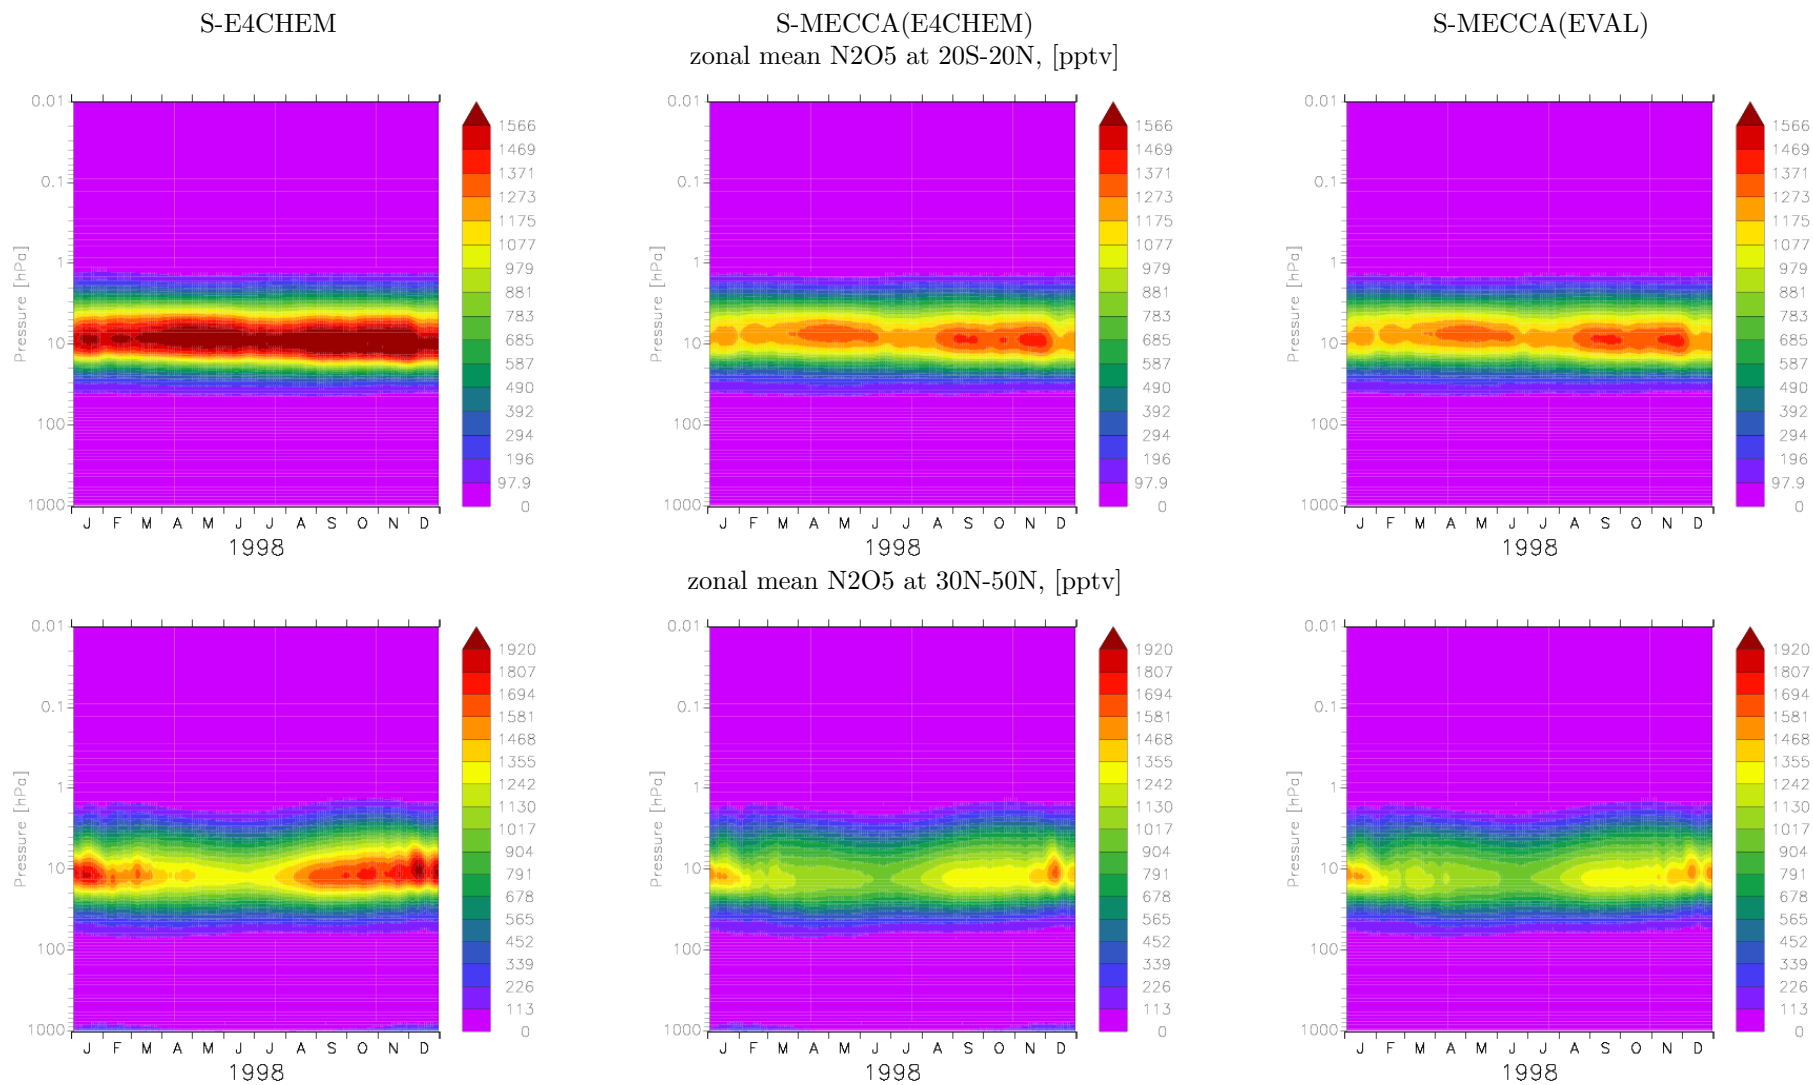

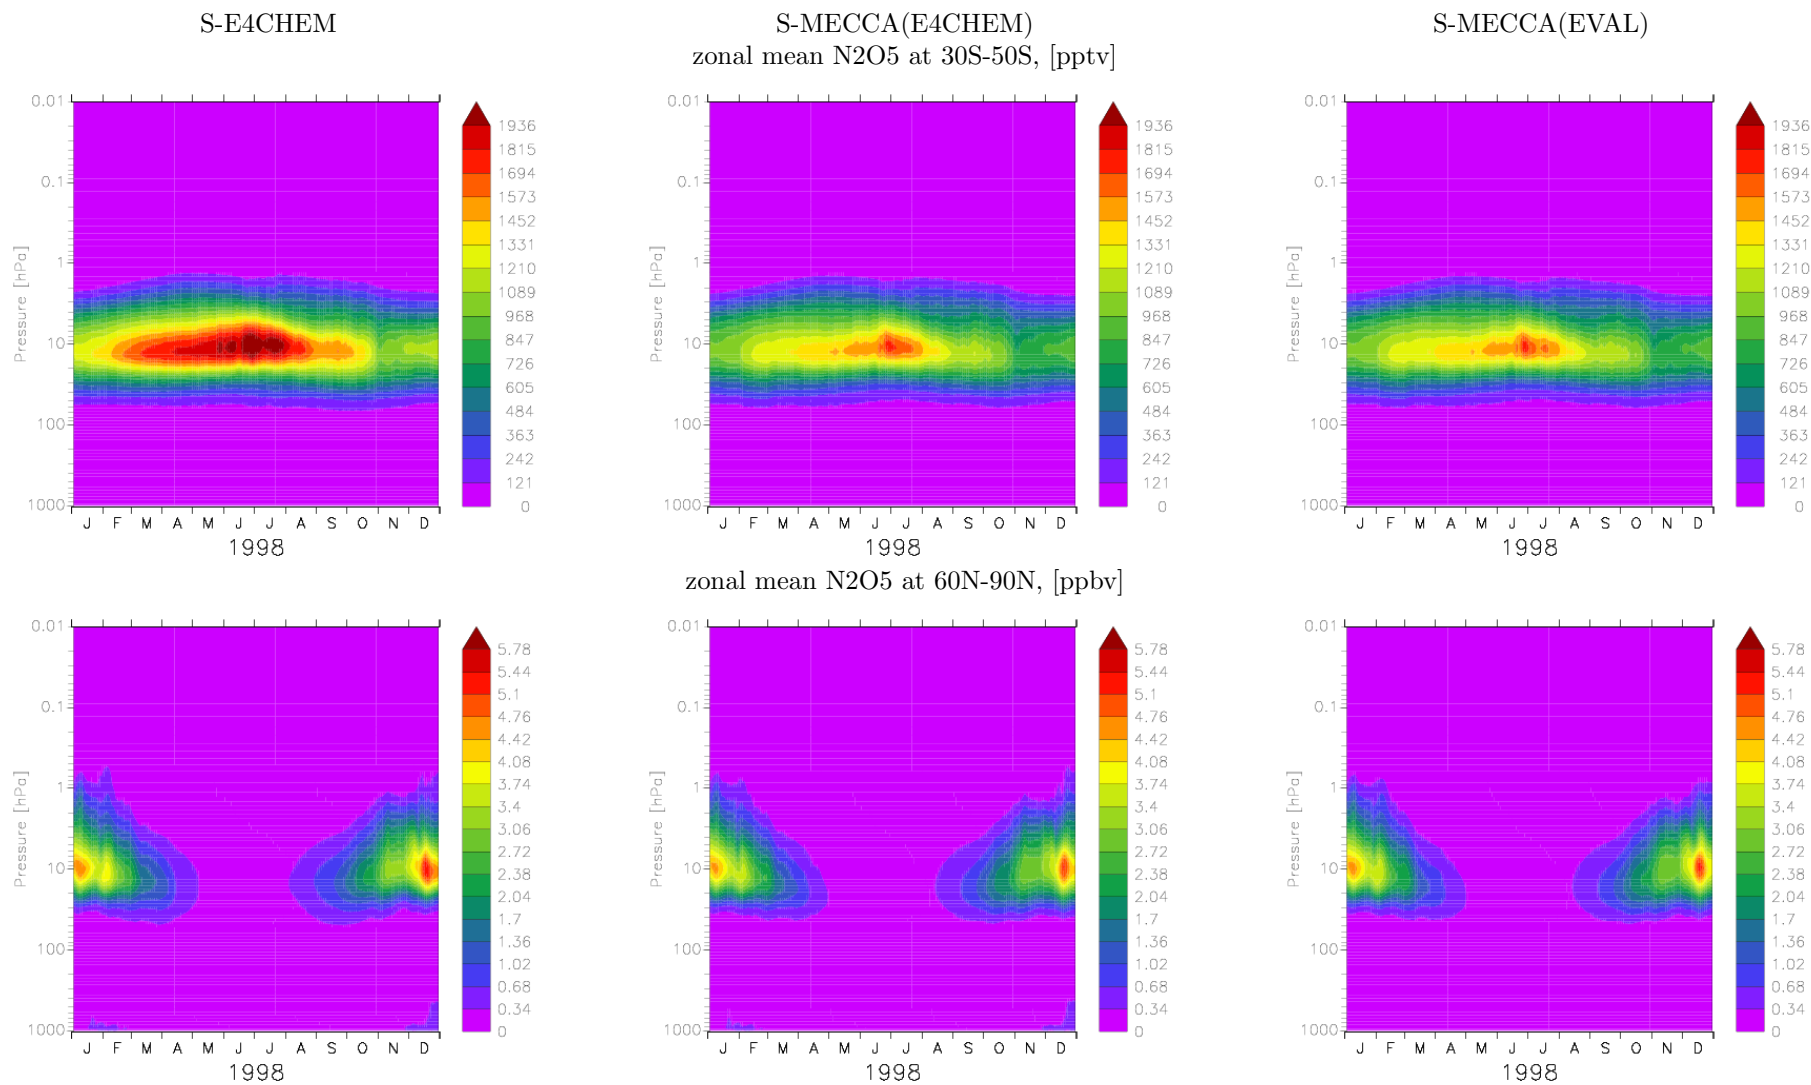

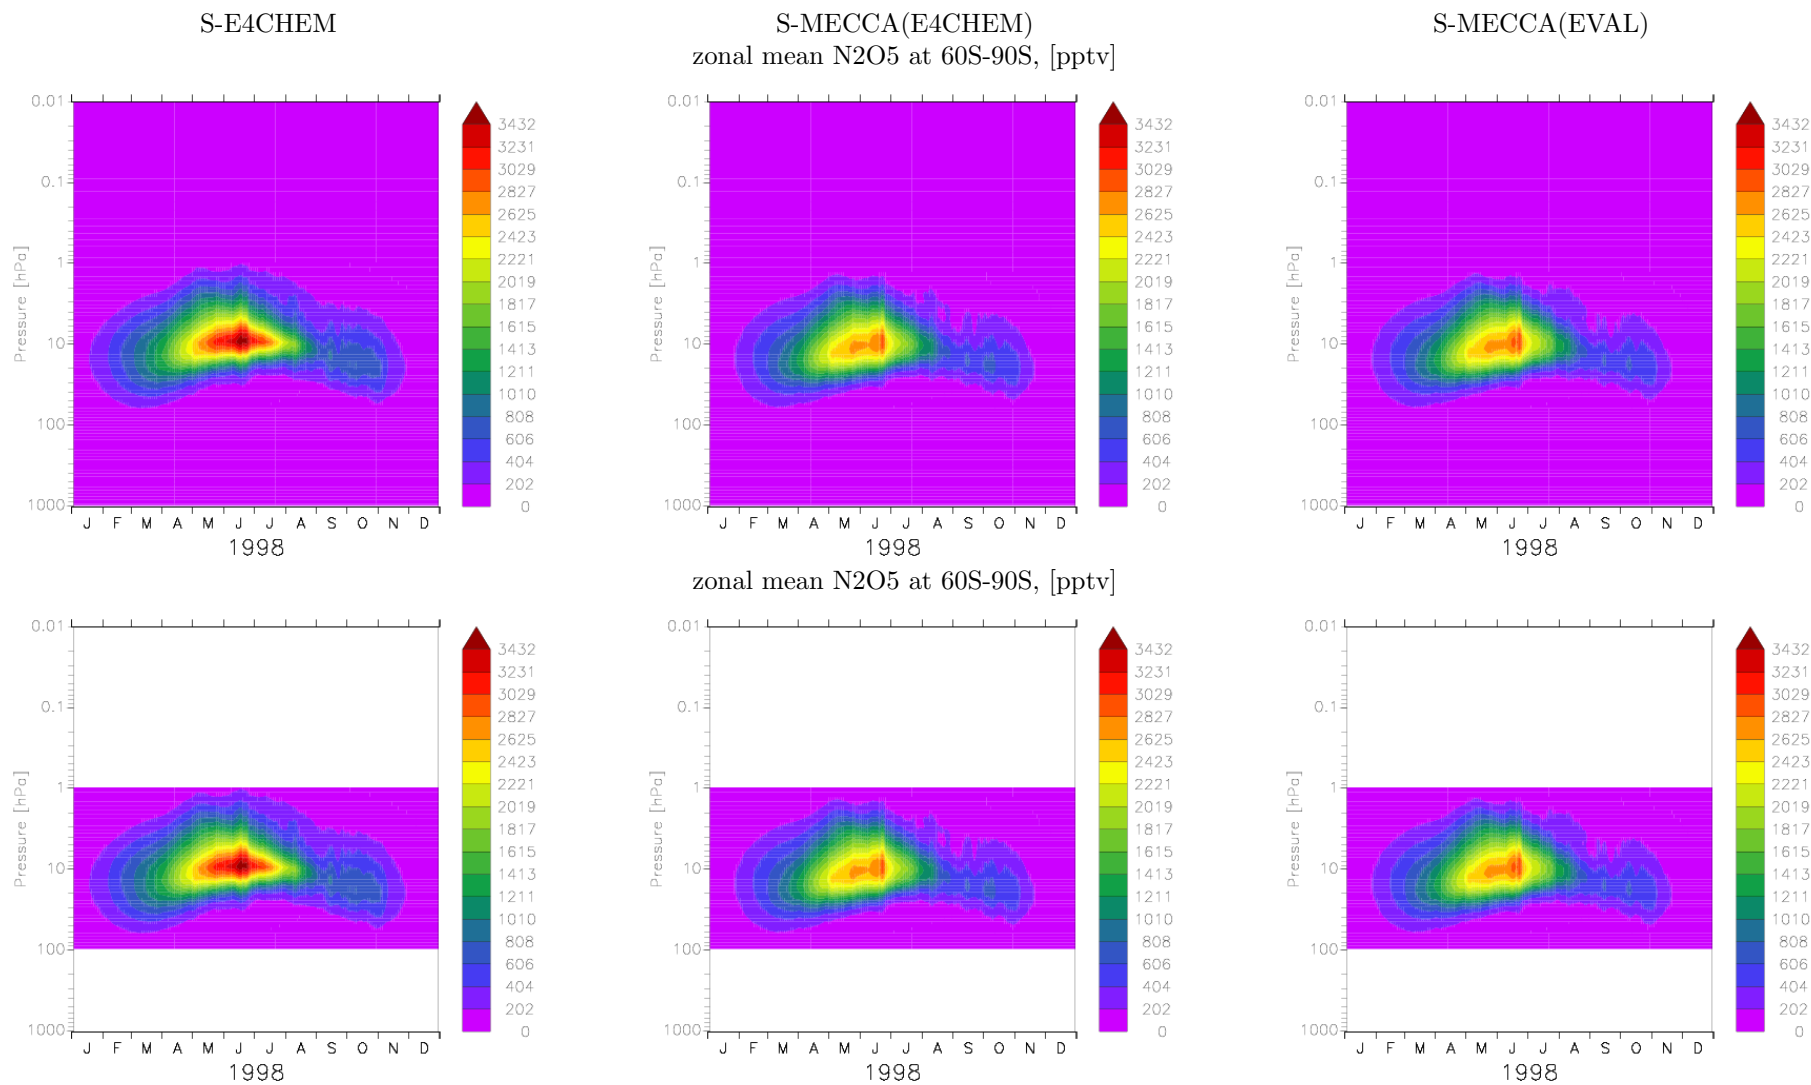

## 9 Species: N<sub>2</sub>O

S-E4CHEM

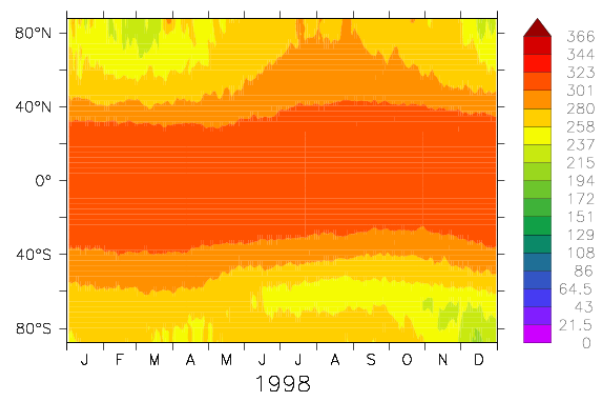S-MECCA(E4CHEM)  
zonal mean N<sub>2</sub>O at 100 hPa, [ppbv]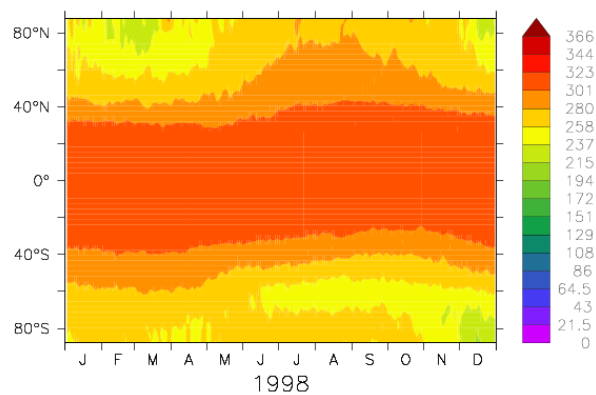

S-MECCA(EVAL)

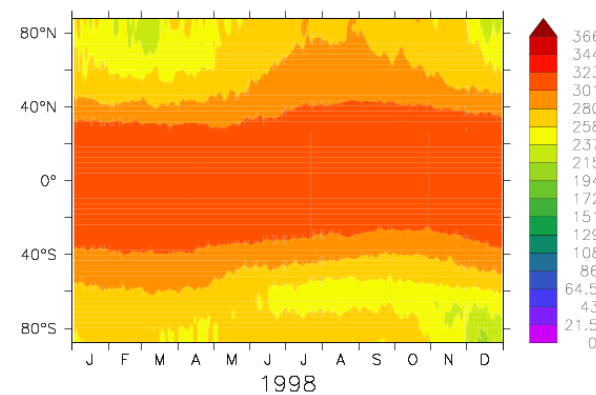zonal mean N<sub>2</sub>O at 50 hPa, [ppbv]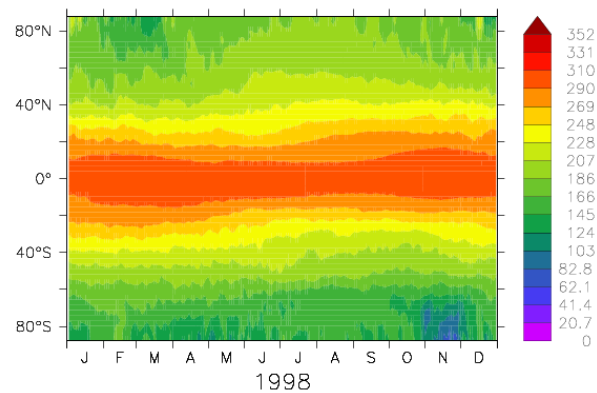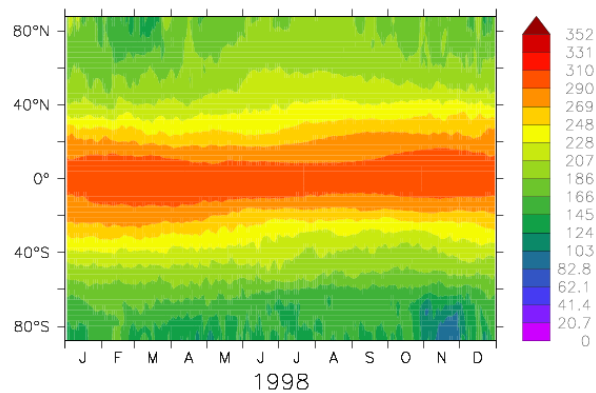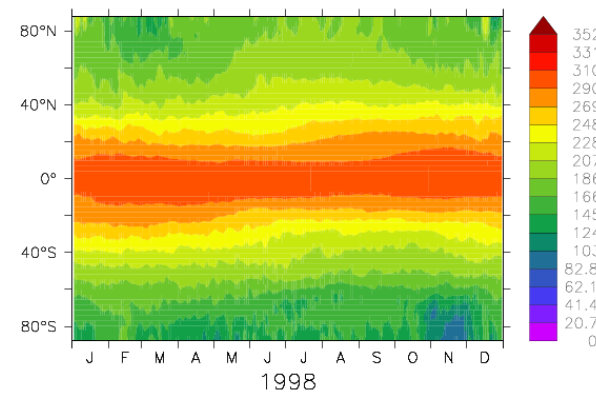



S-E4CHEM

S-MECCA(E4CHEM)  
zonal mean N<sub>2</sub>O at 10 hPa, [ppbv]

S-MECCA(EVAL)

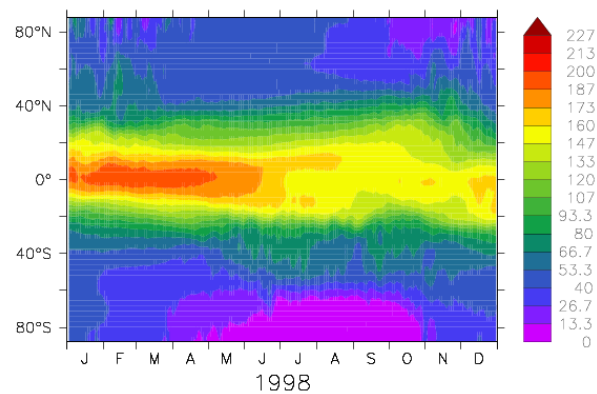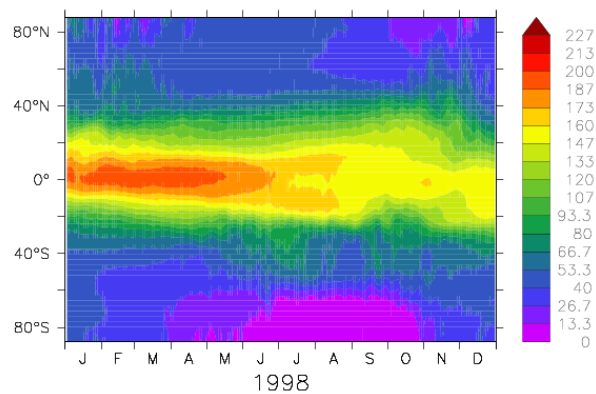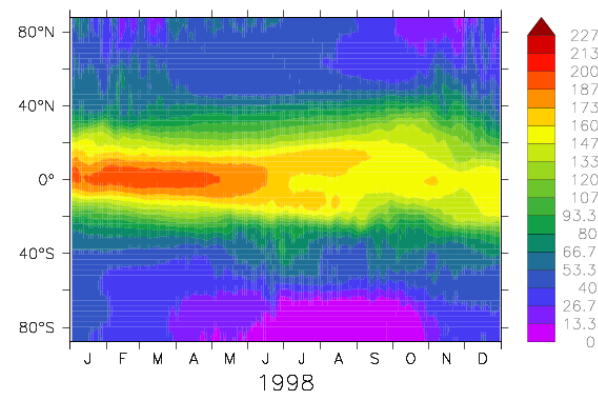zonal mean N<sub>2</sub>O at 1 hPa, [ppbv]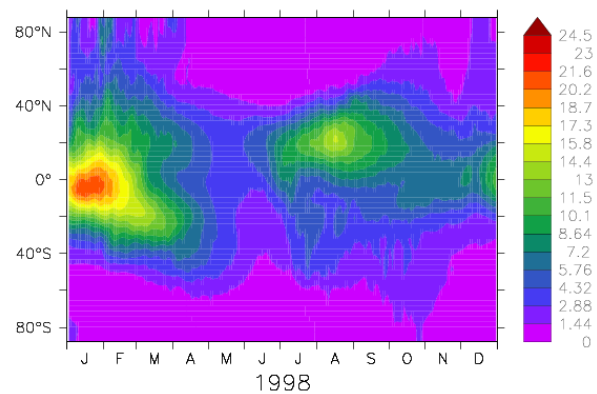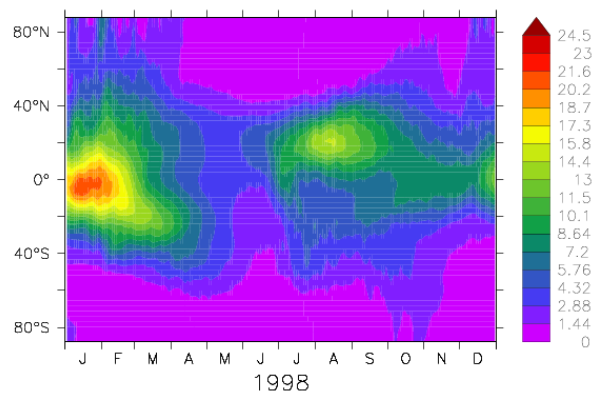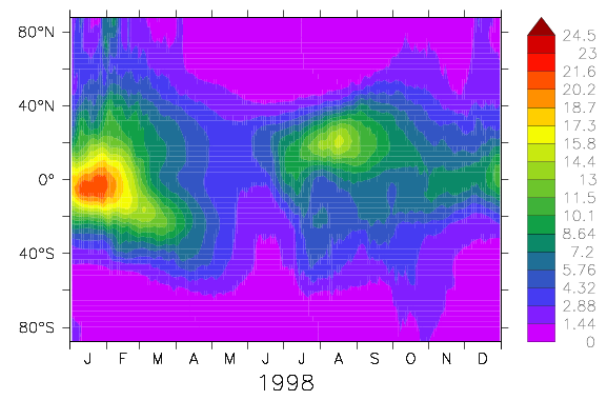



S-E4CHEM

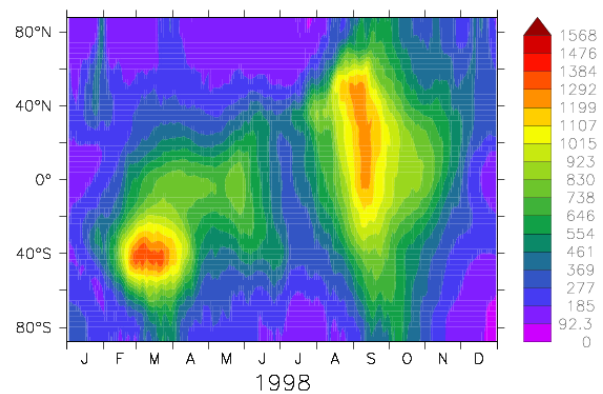S-MECCA(E4CHEM)  
zonal mean N<sub>2</sub>O at 0.1 hPa, [pptv]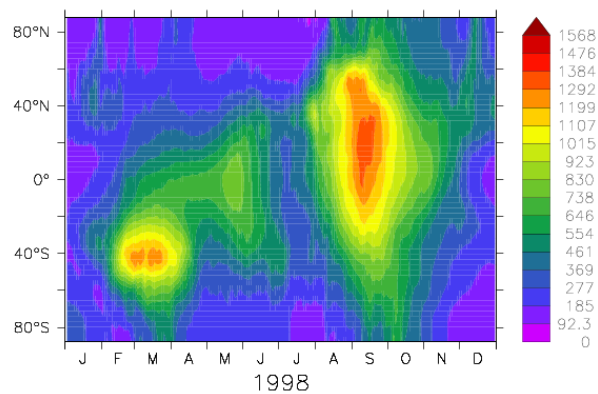

S-MECCA(EVAL)

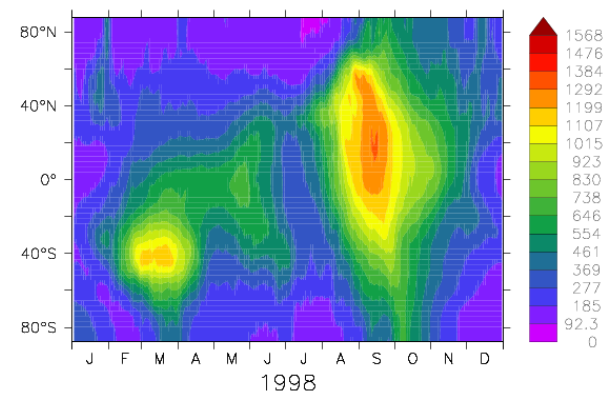zonal mean N<sub>2</sub>O at t=1-Jan-1998:31-Dec-1998, [ppbv]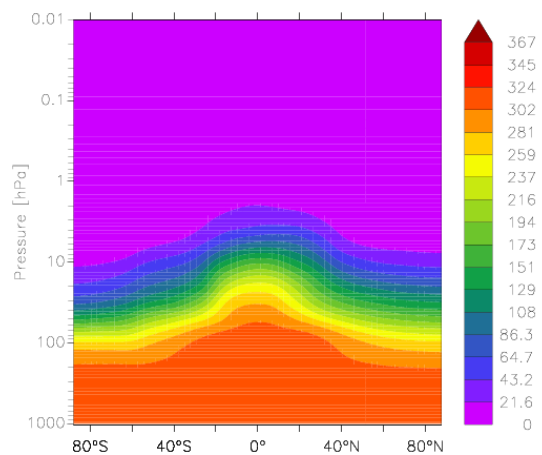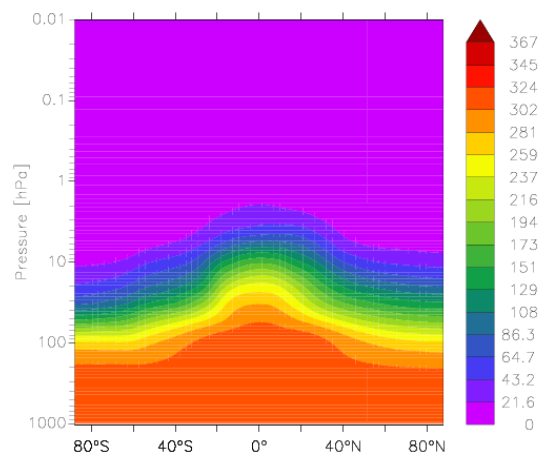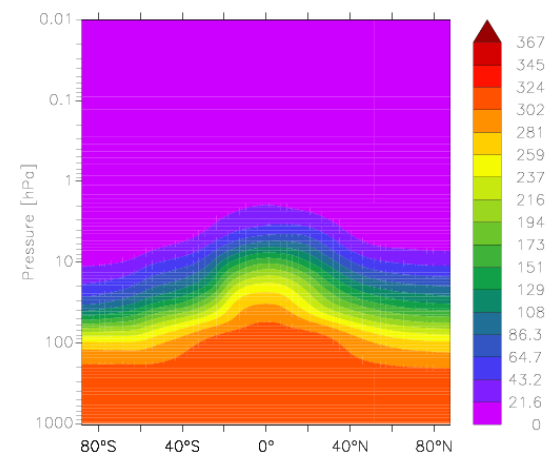

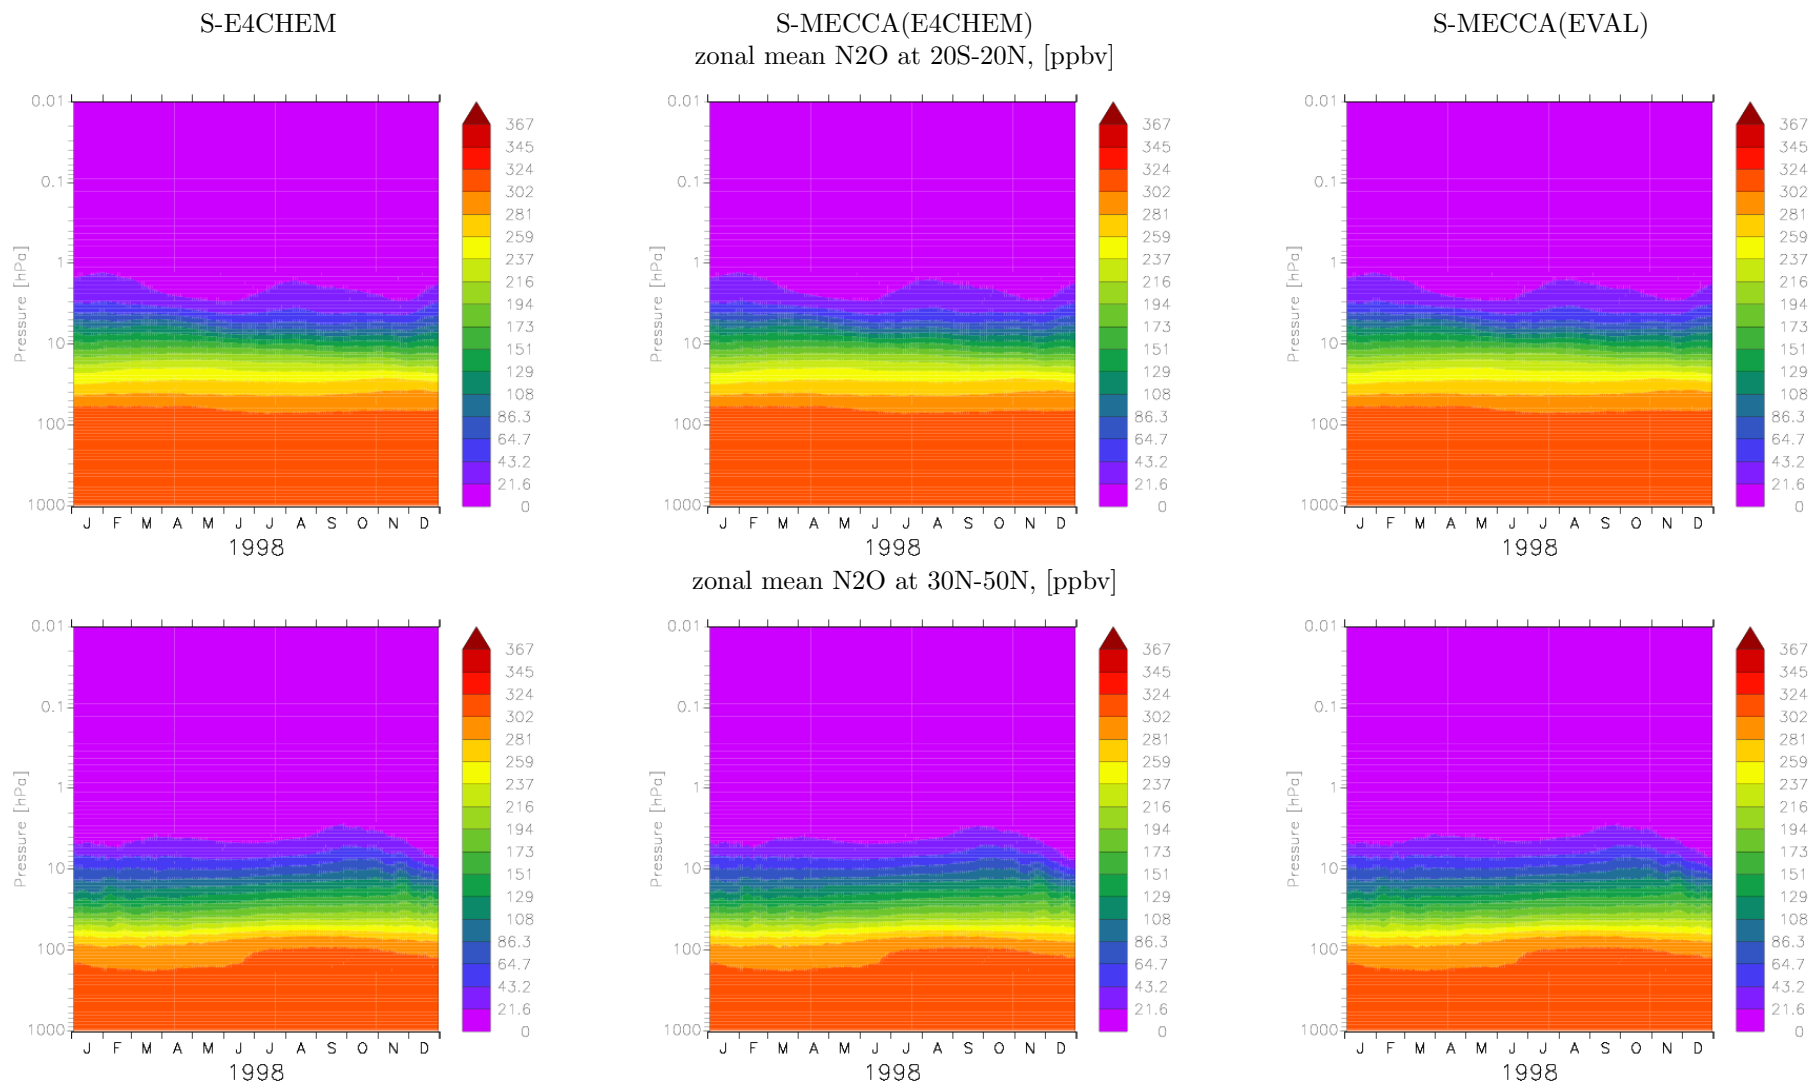

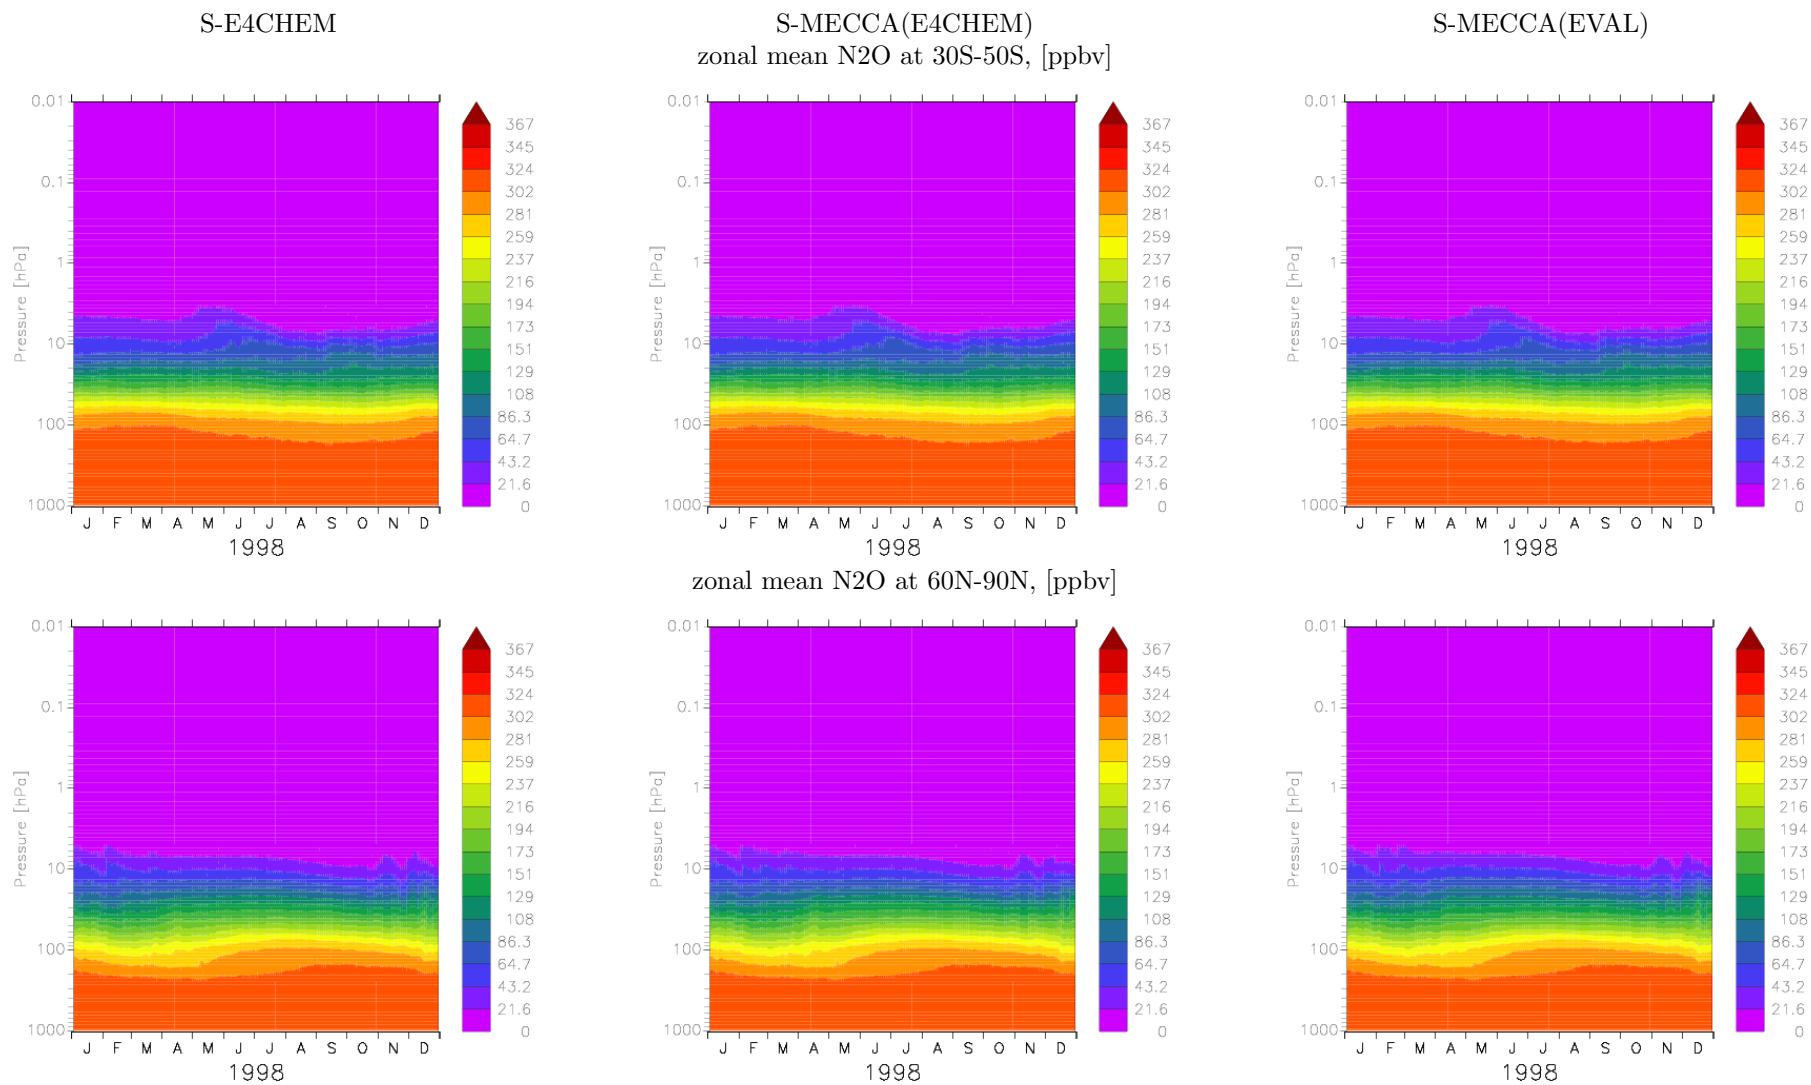

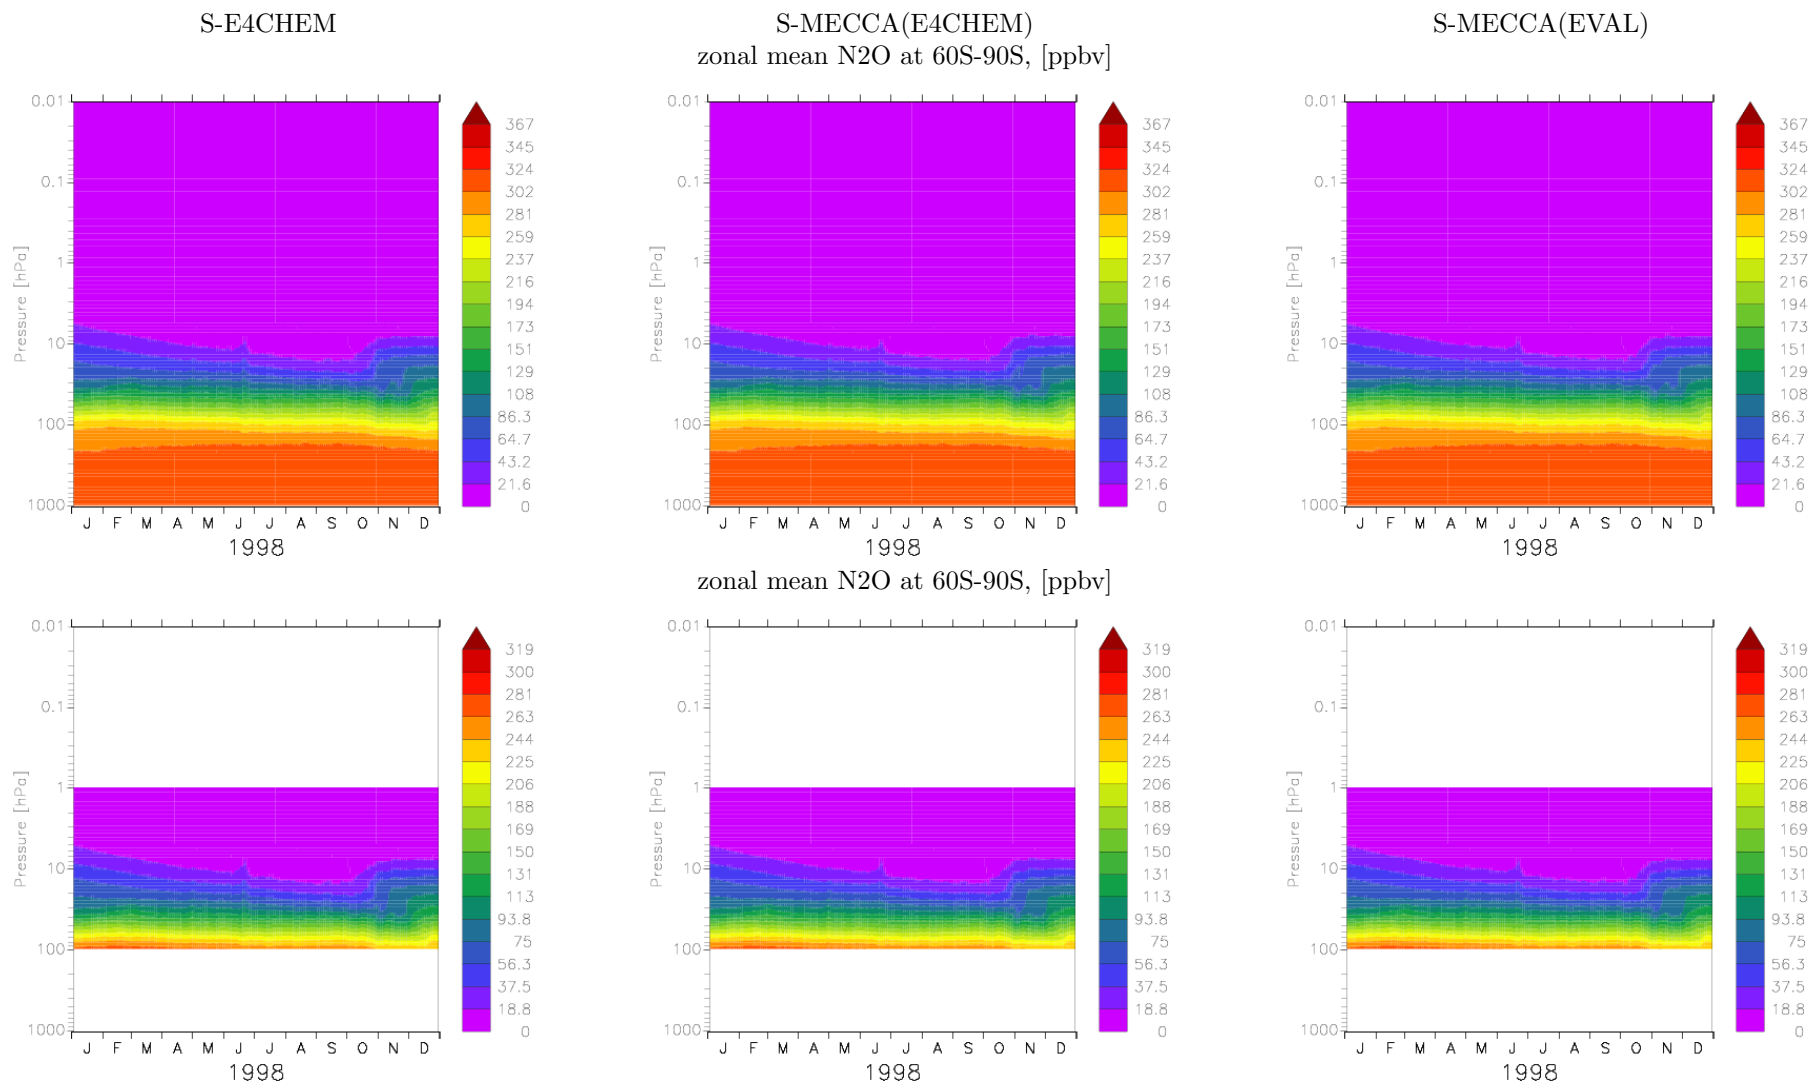

## 10 Species: NO<sub>x</sub>

S-E4CHEM

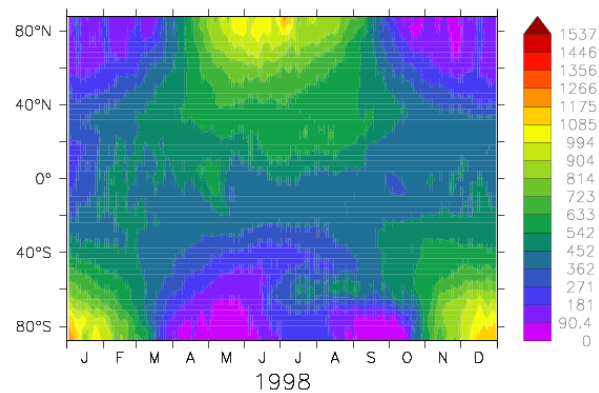S-MECCA(E4CHEM)  
zonal mean NO<sub>x</sub> at 100 hPa, [pptv]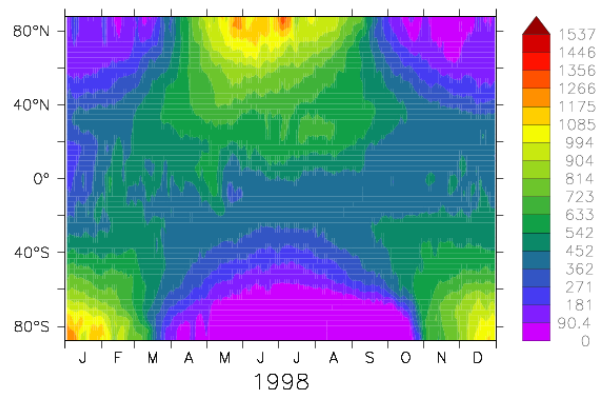

S-MECCA(EVAL)

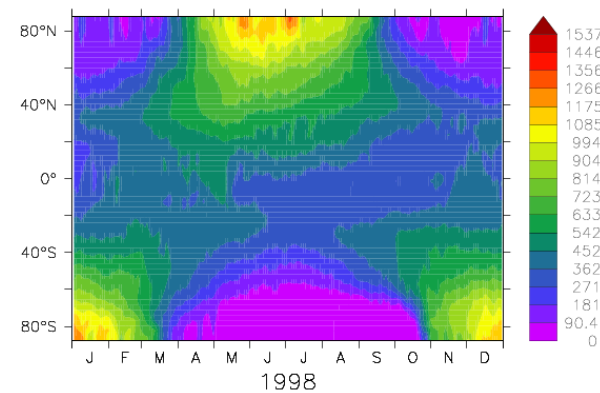zonal mean NO<sub>x</sub> at 50 hPa, [pptv]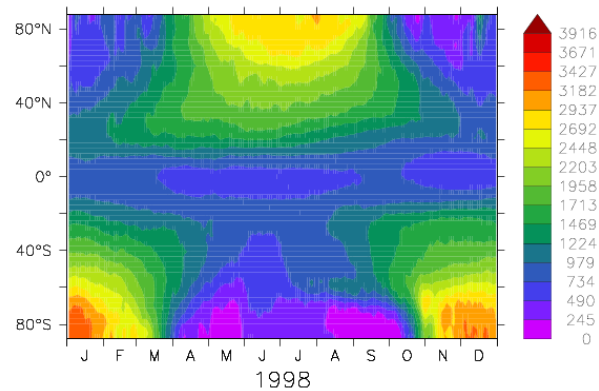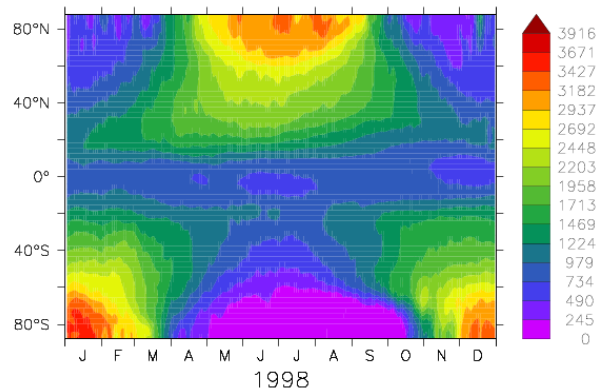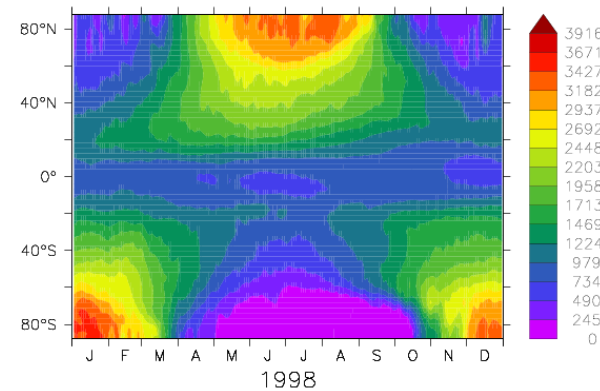

S-E4CHEM

S-MECCA(E4CHEM)  
zonal mean NOX at 10 hPa, [ppbv]

S-MECCA(EVAL)

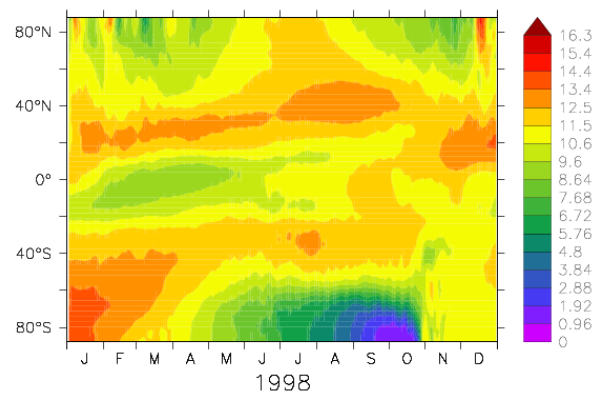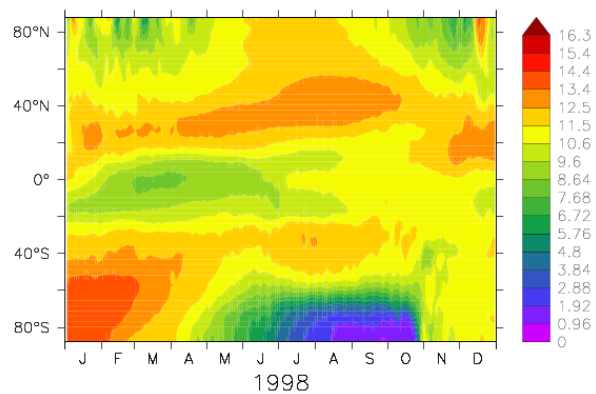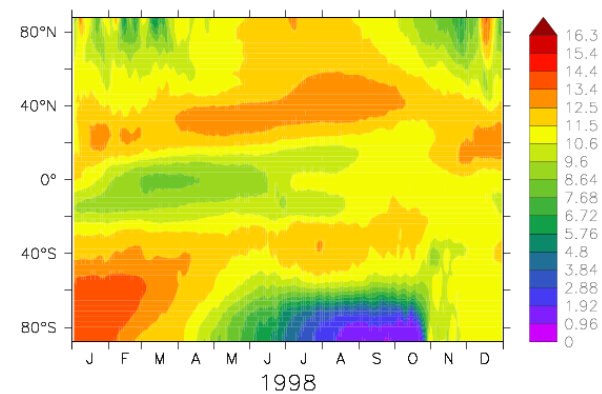

zonal mean NOX at 1 hPa, [ppbv]

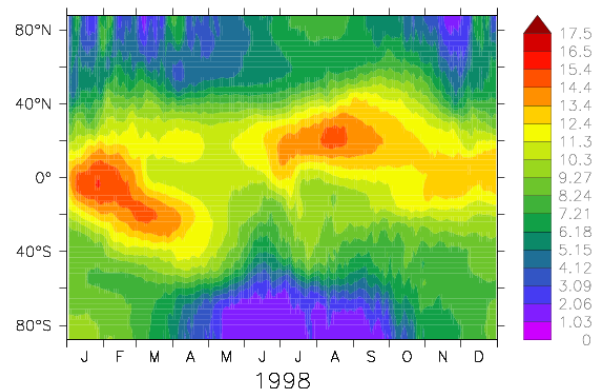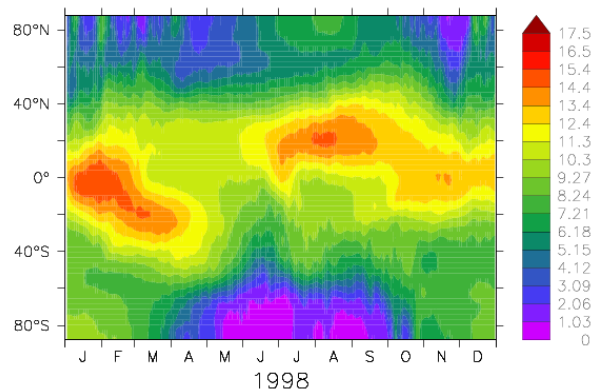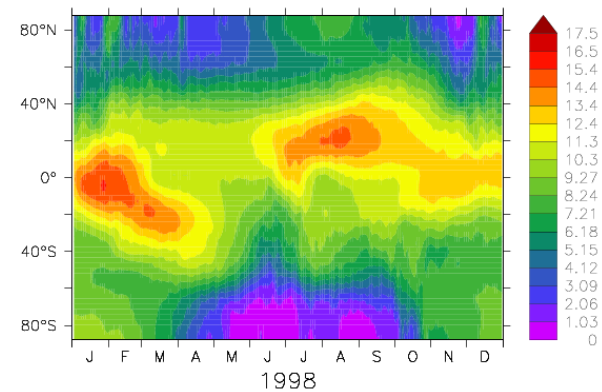



S-E4CHEM

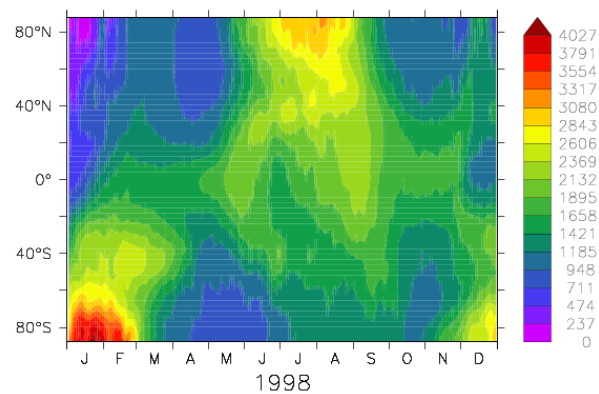S-MECCA(E4CHEM)  
zonal mean NO<sub>x</sub> at 0.1 hPa, [pptv]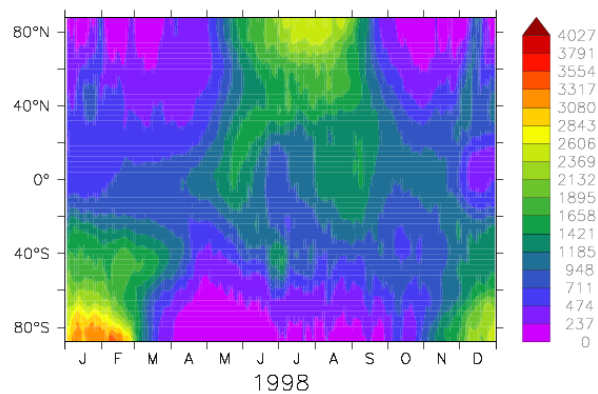

S-MECCA(EVAL)

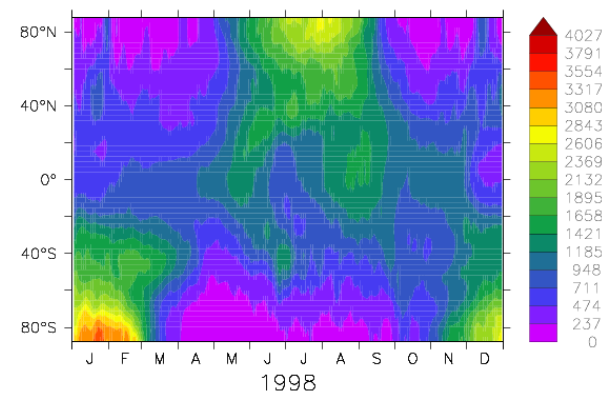zonal mean NO<sub>x</sub> at t=1-Jan-1998:31-Dec-1998, [ppbv]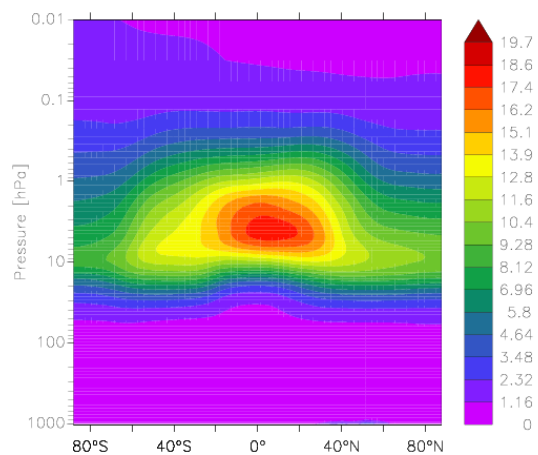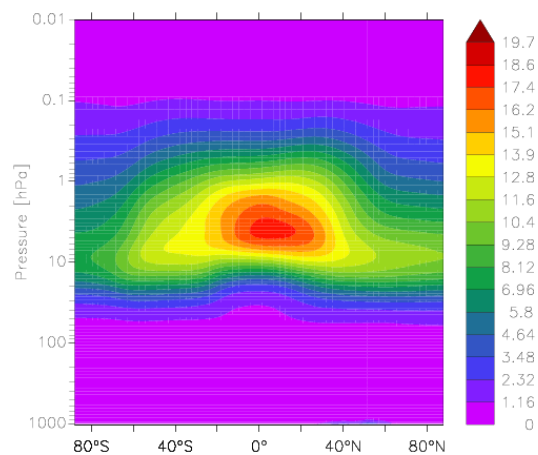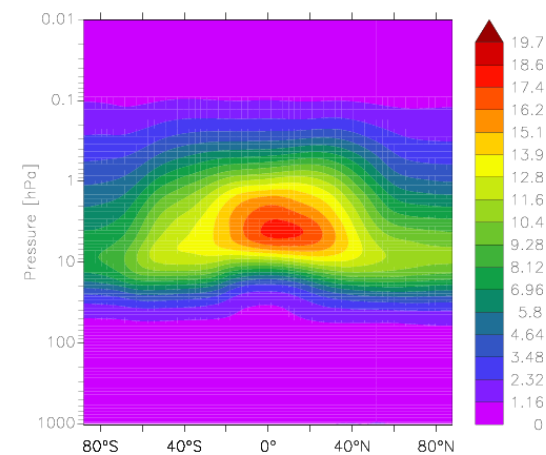

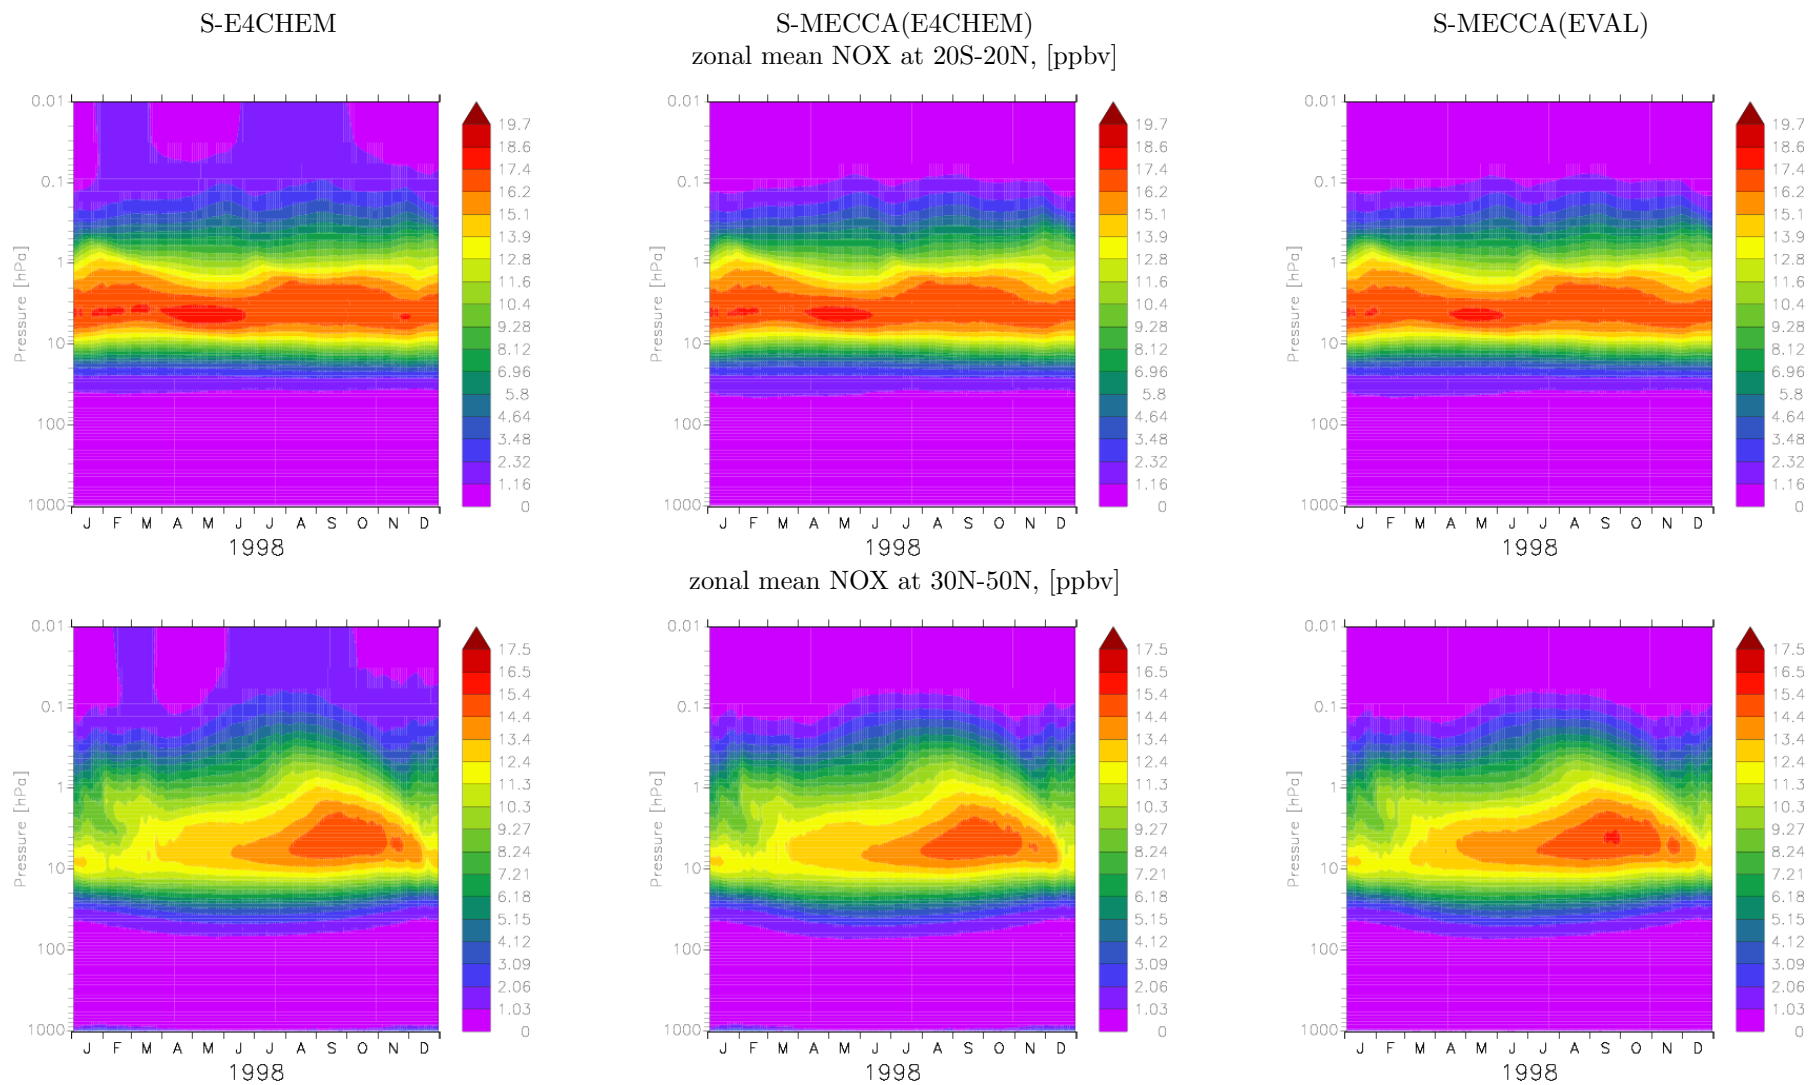



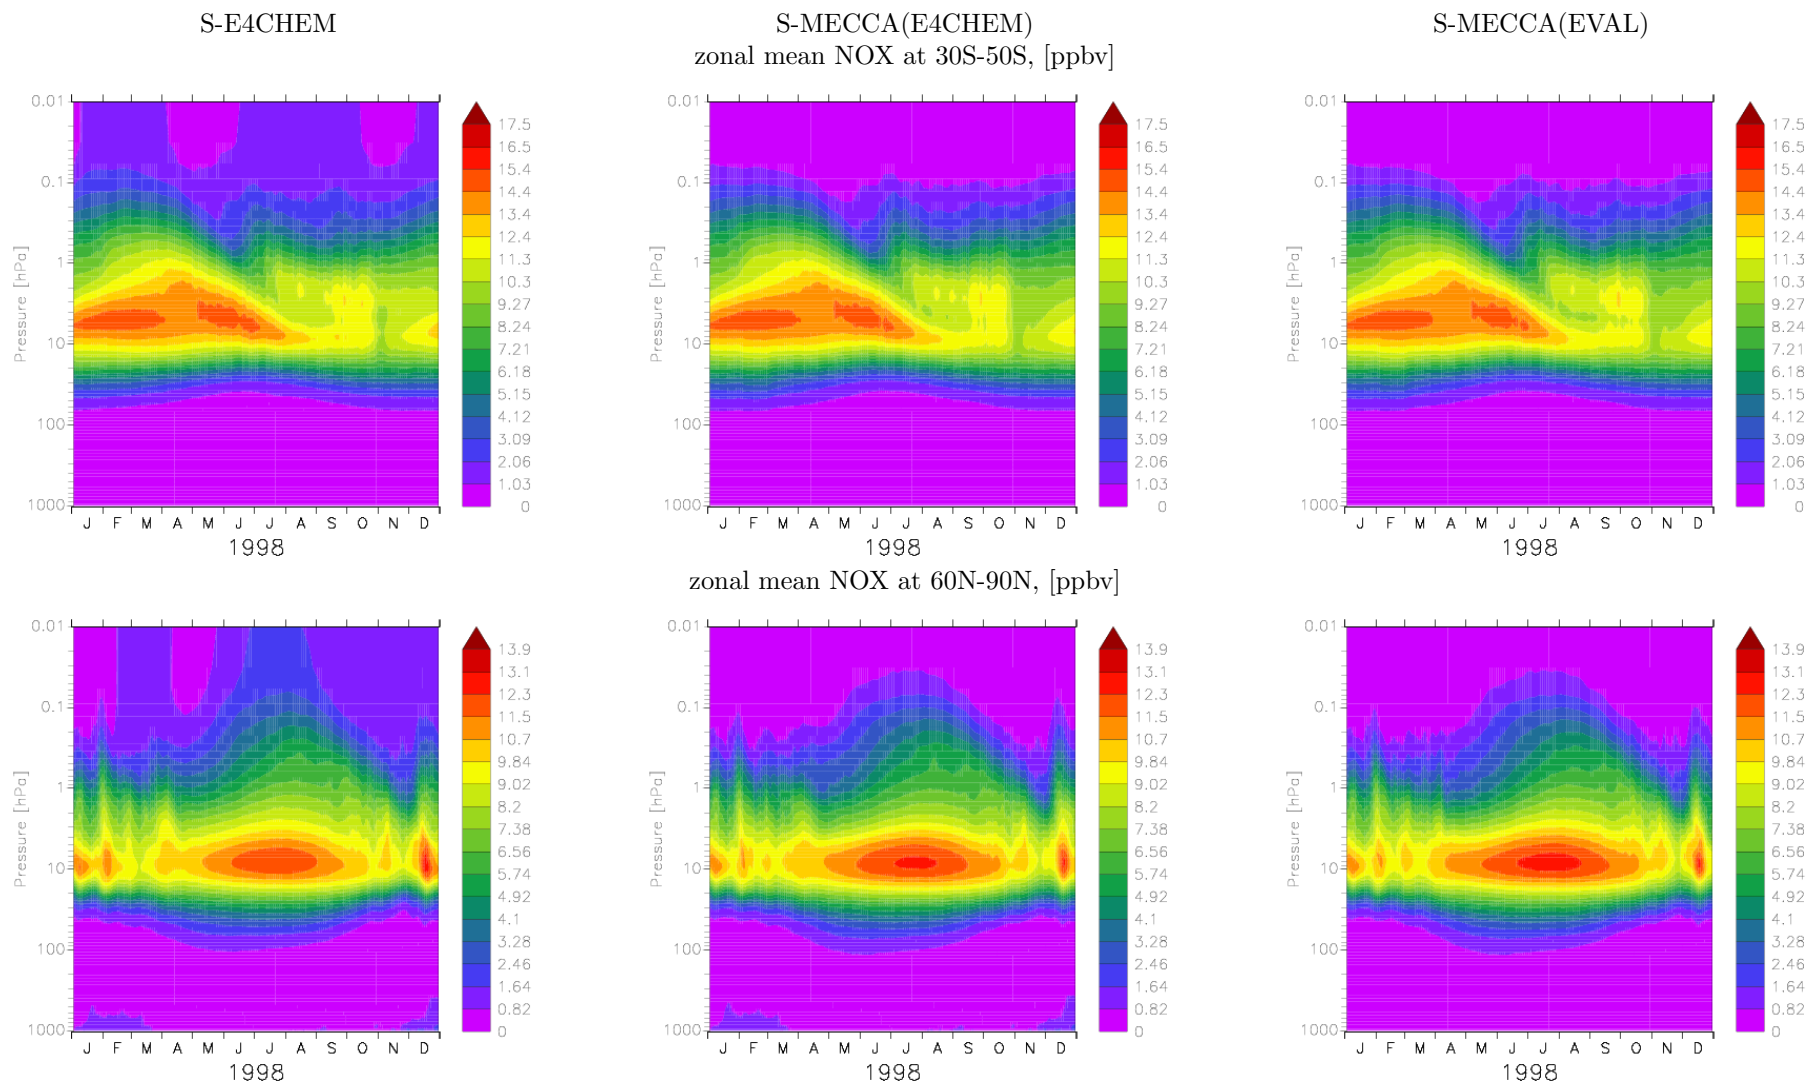

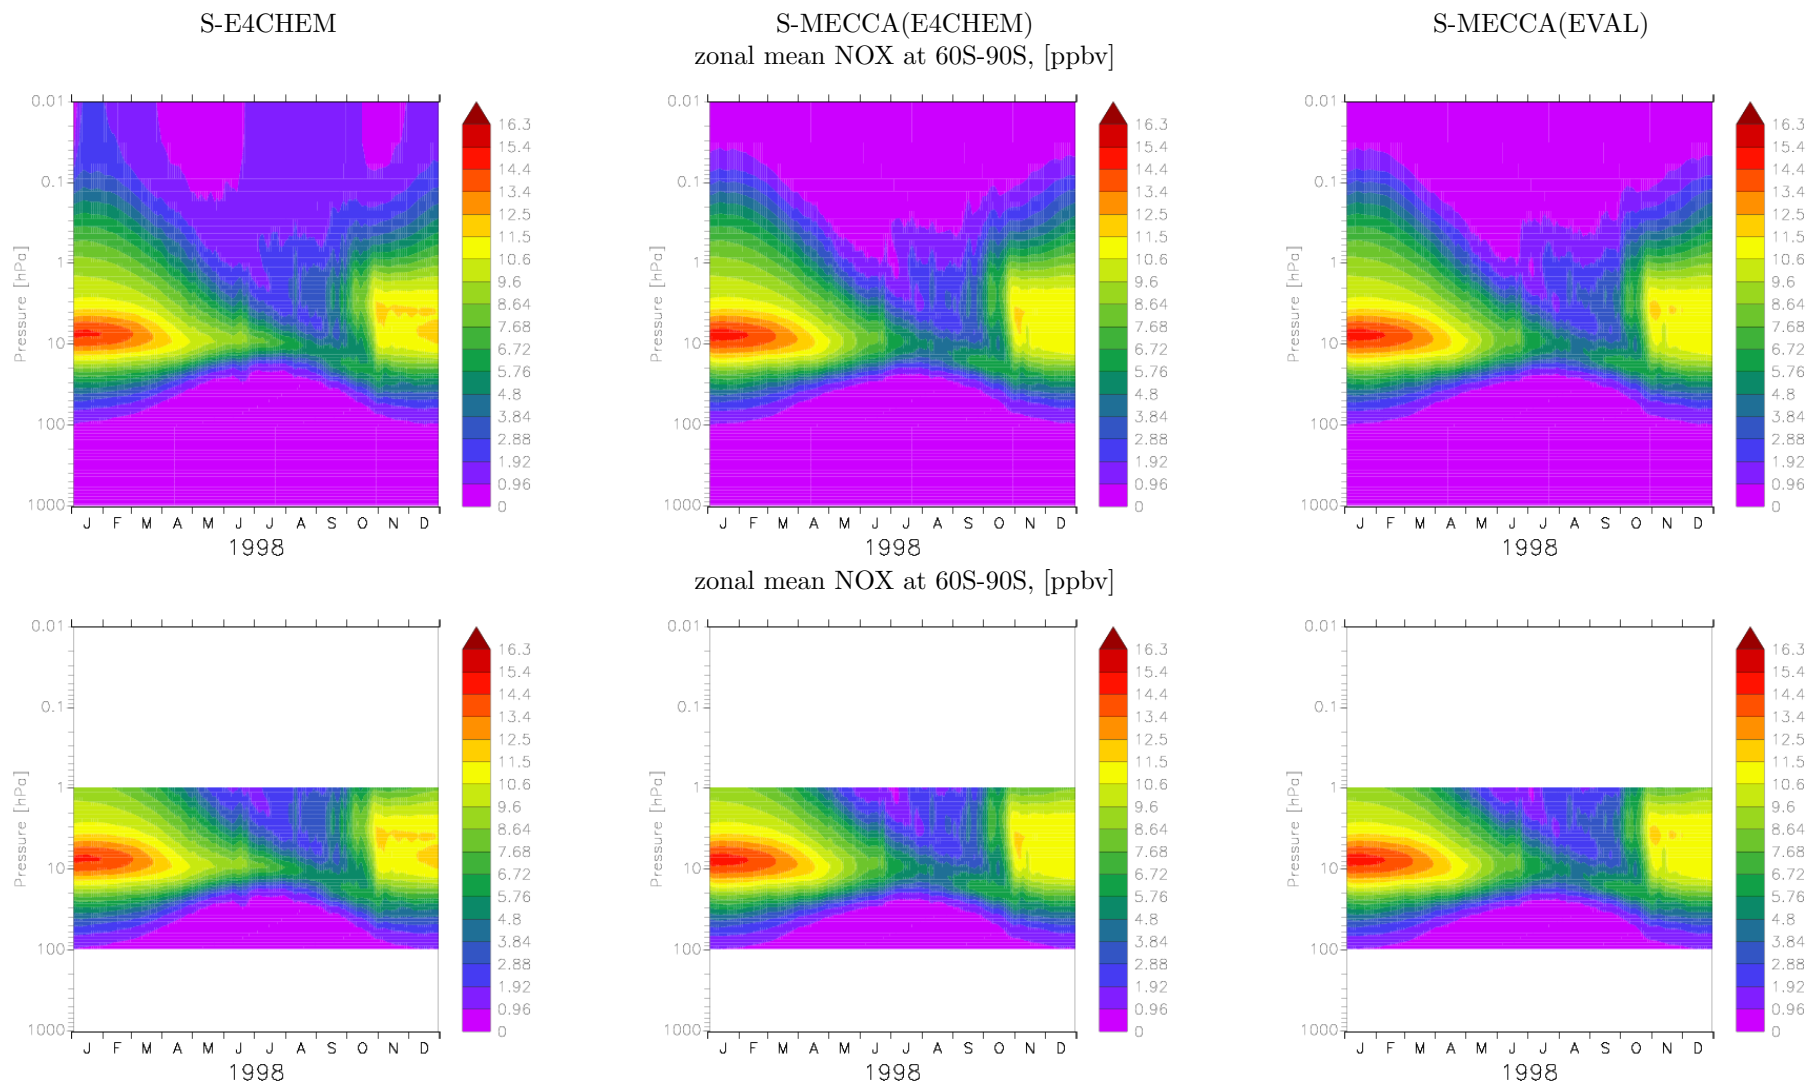

## 11 Species: O<sub>3</sub>

S-E4CHEM

S-MECCA(E4CHEM)  
zonal mean O3 at 100 hPa, [ppbv]

S-MECCA(EVAL)

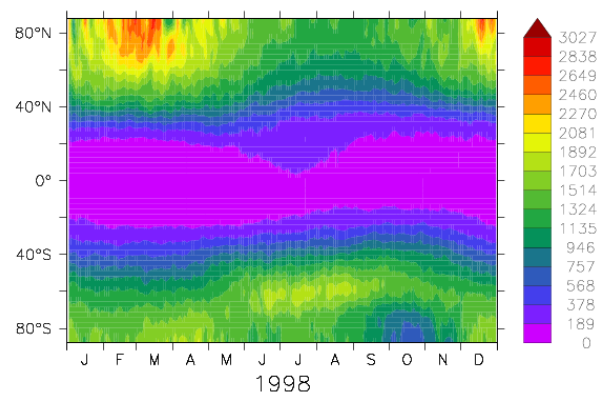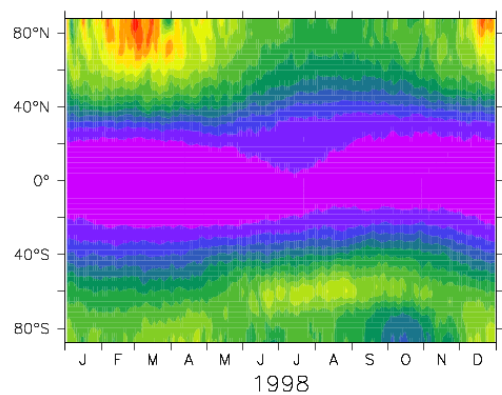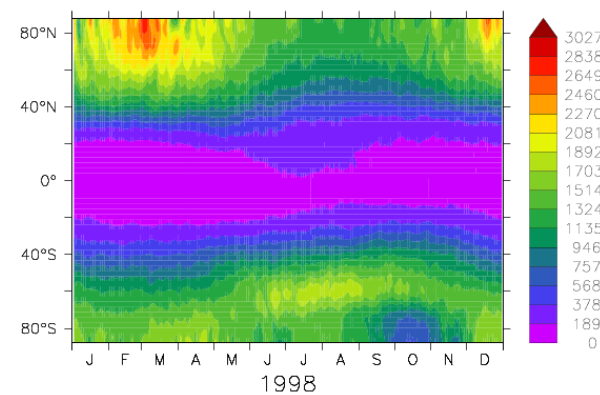

zonal mean O3 at 50 hPa, [ppmv]

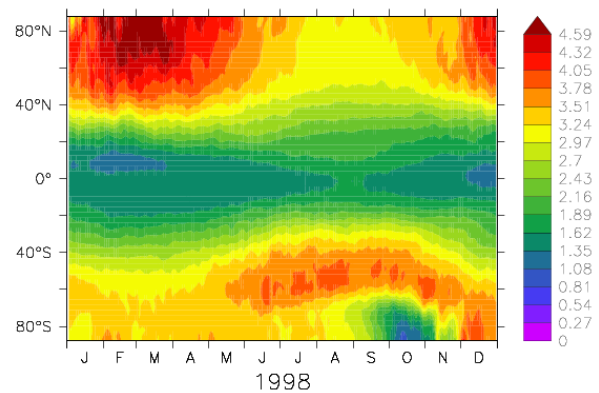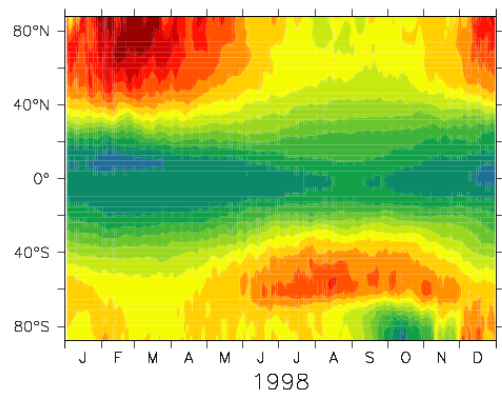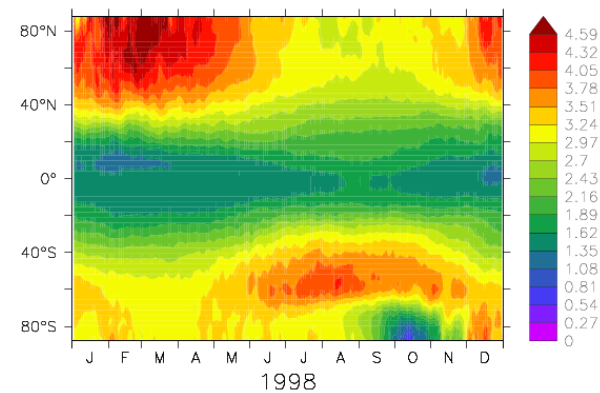

S-E4CHEM

S-MECCA(E4CHEM)  
zonal mean O<sub>3</sub> at 10 hPa, [ppmv]

S-MECCA(EVAL)

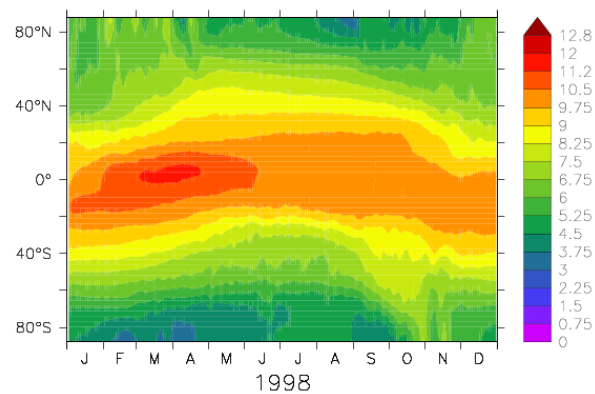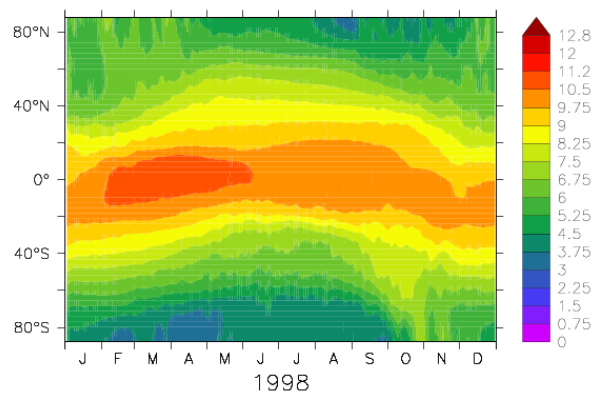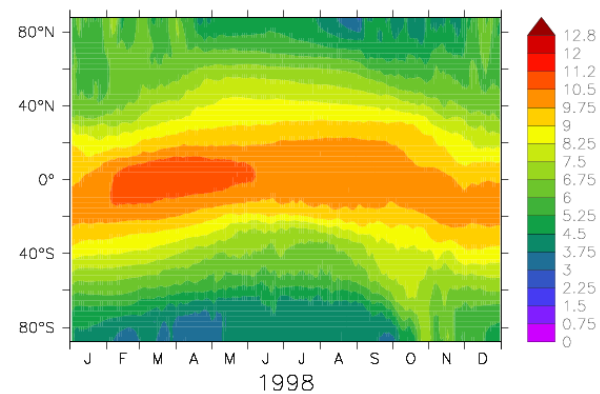zonal mean O<sub>3</sub> at 1 hPa, [ppmv]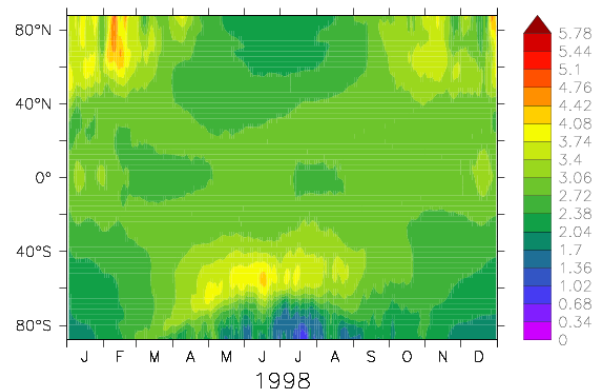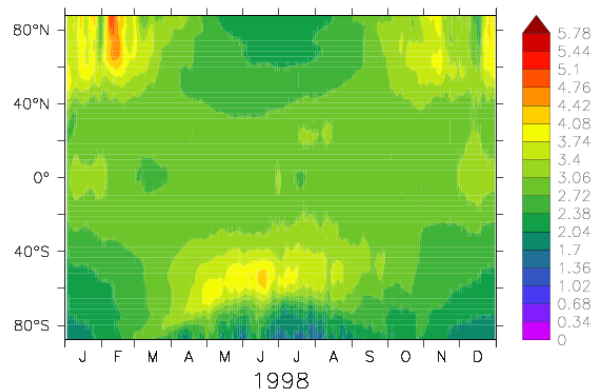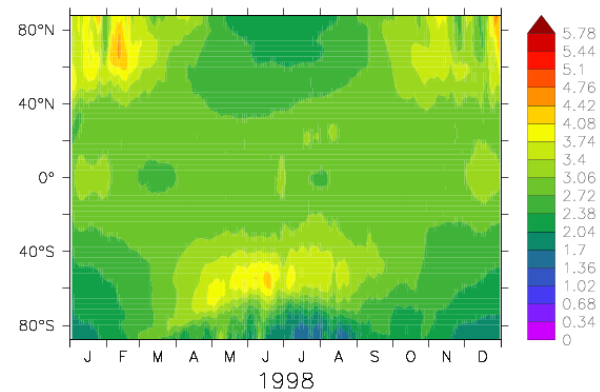

S-E4CHEM

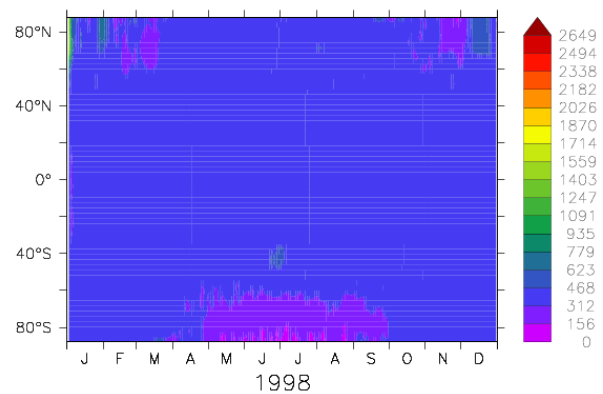S-MECCA(E4CHEM)  
zonal mean O<sub>3</sub> at 0.1 hPa, [ppbv]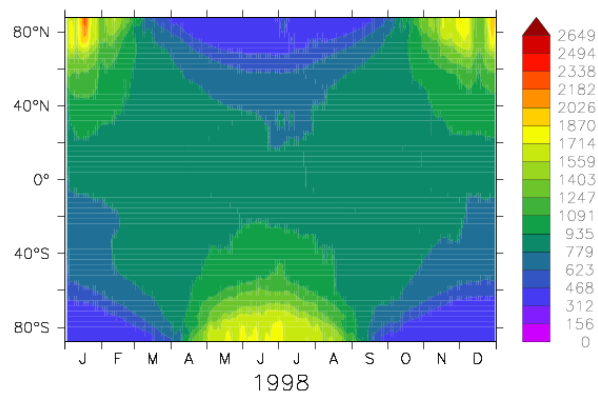

S-MECCA(EVAL)

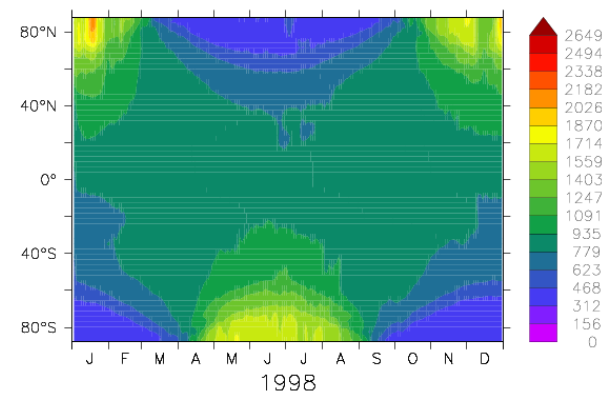zonal mean O<sub>3</sub> at t=1-Jan-1998:31-Dec-1998, [ppmv]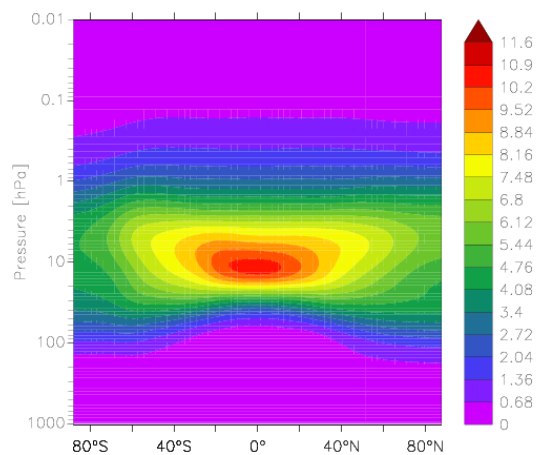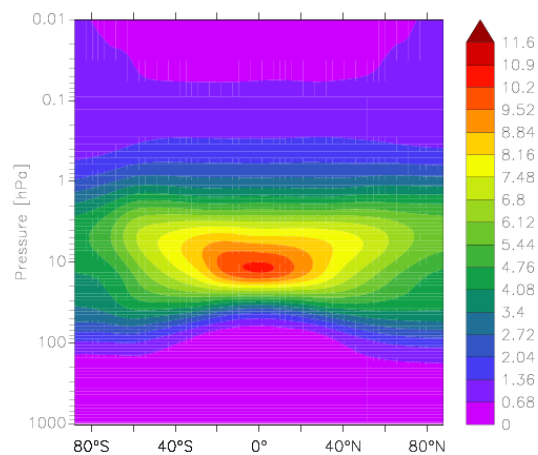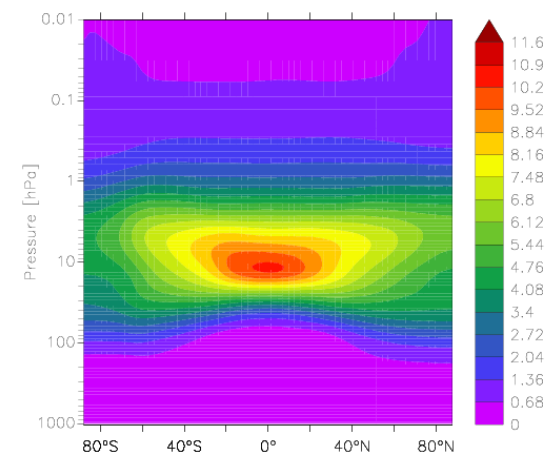

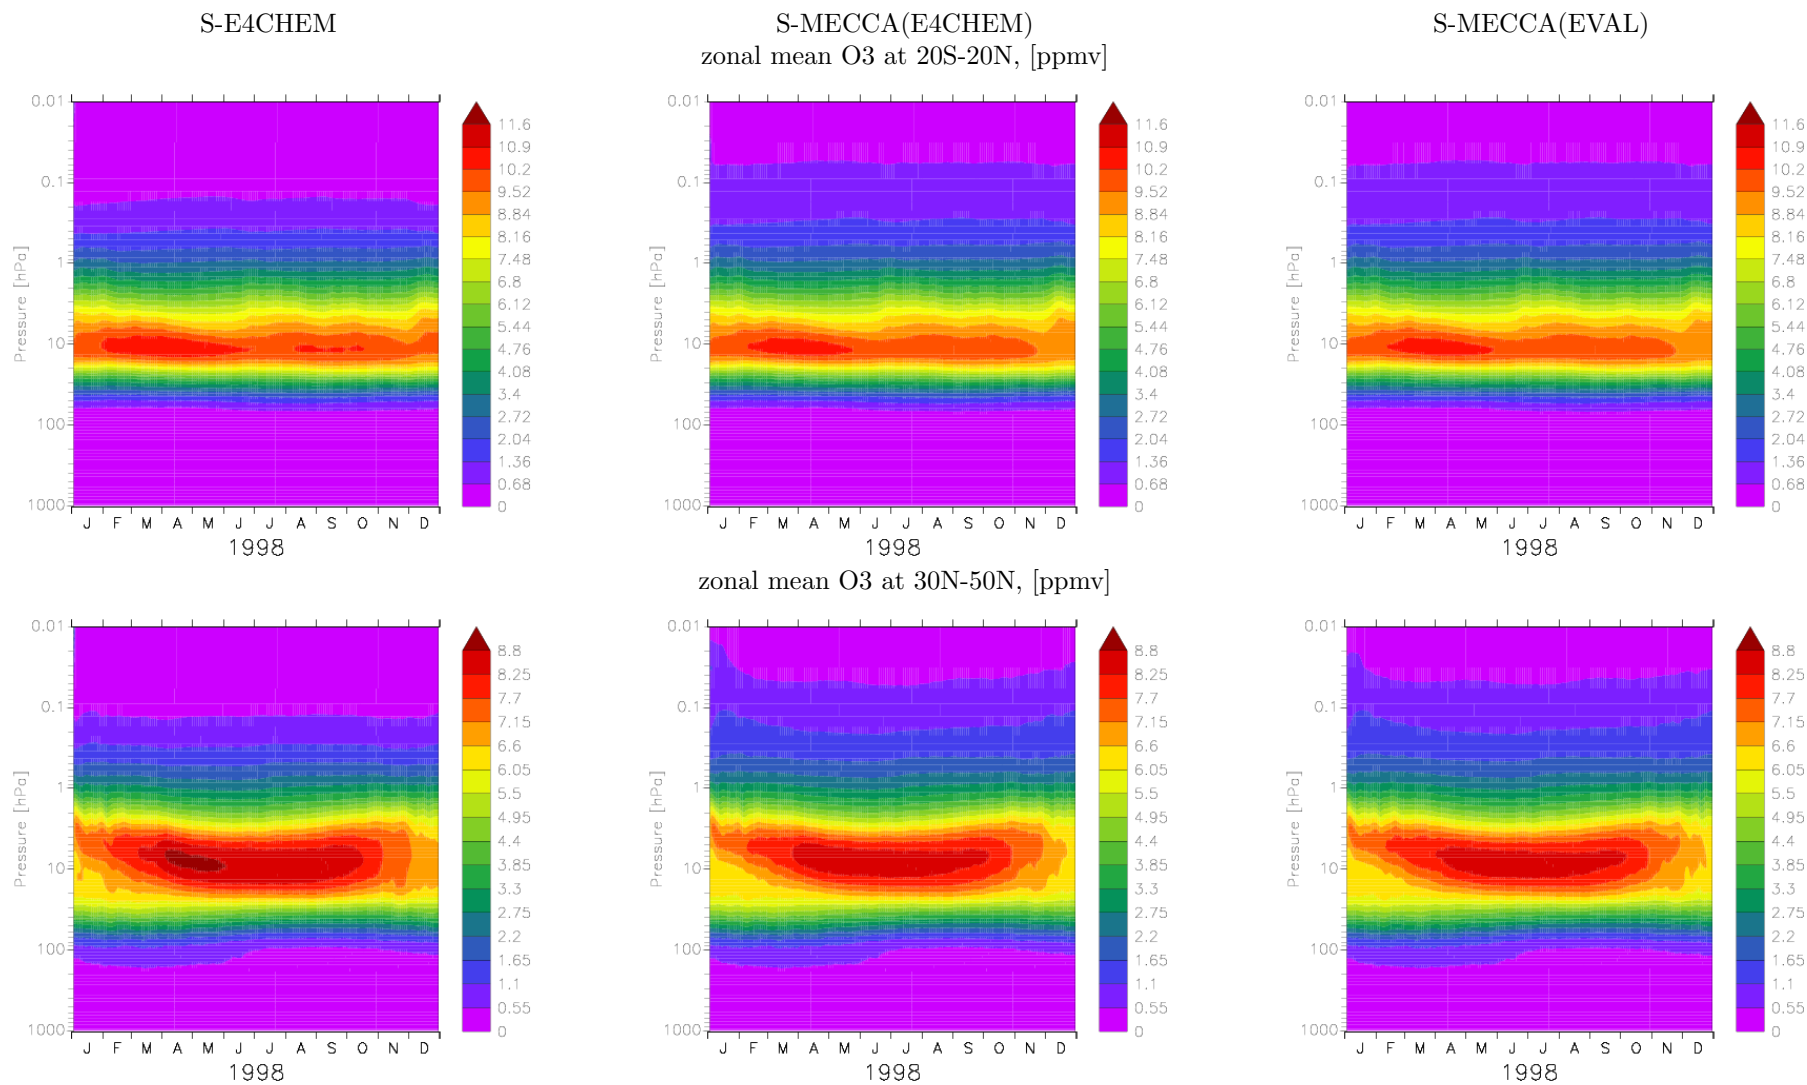



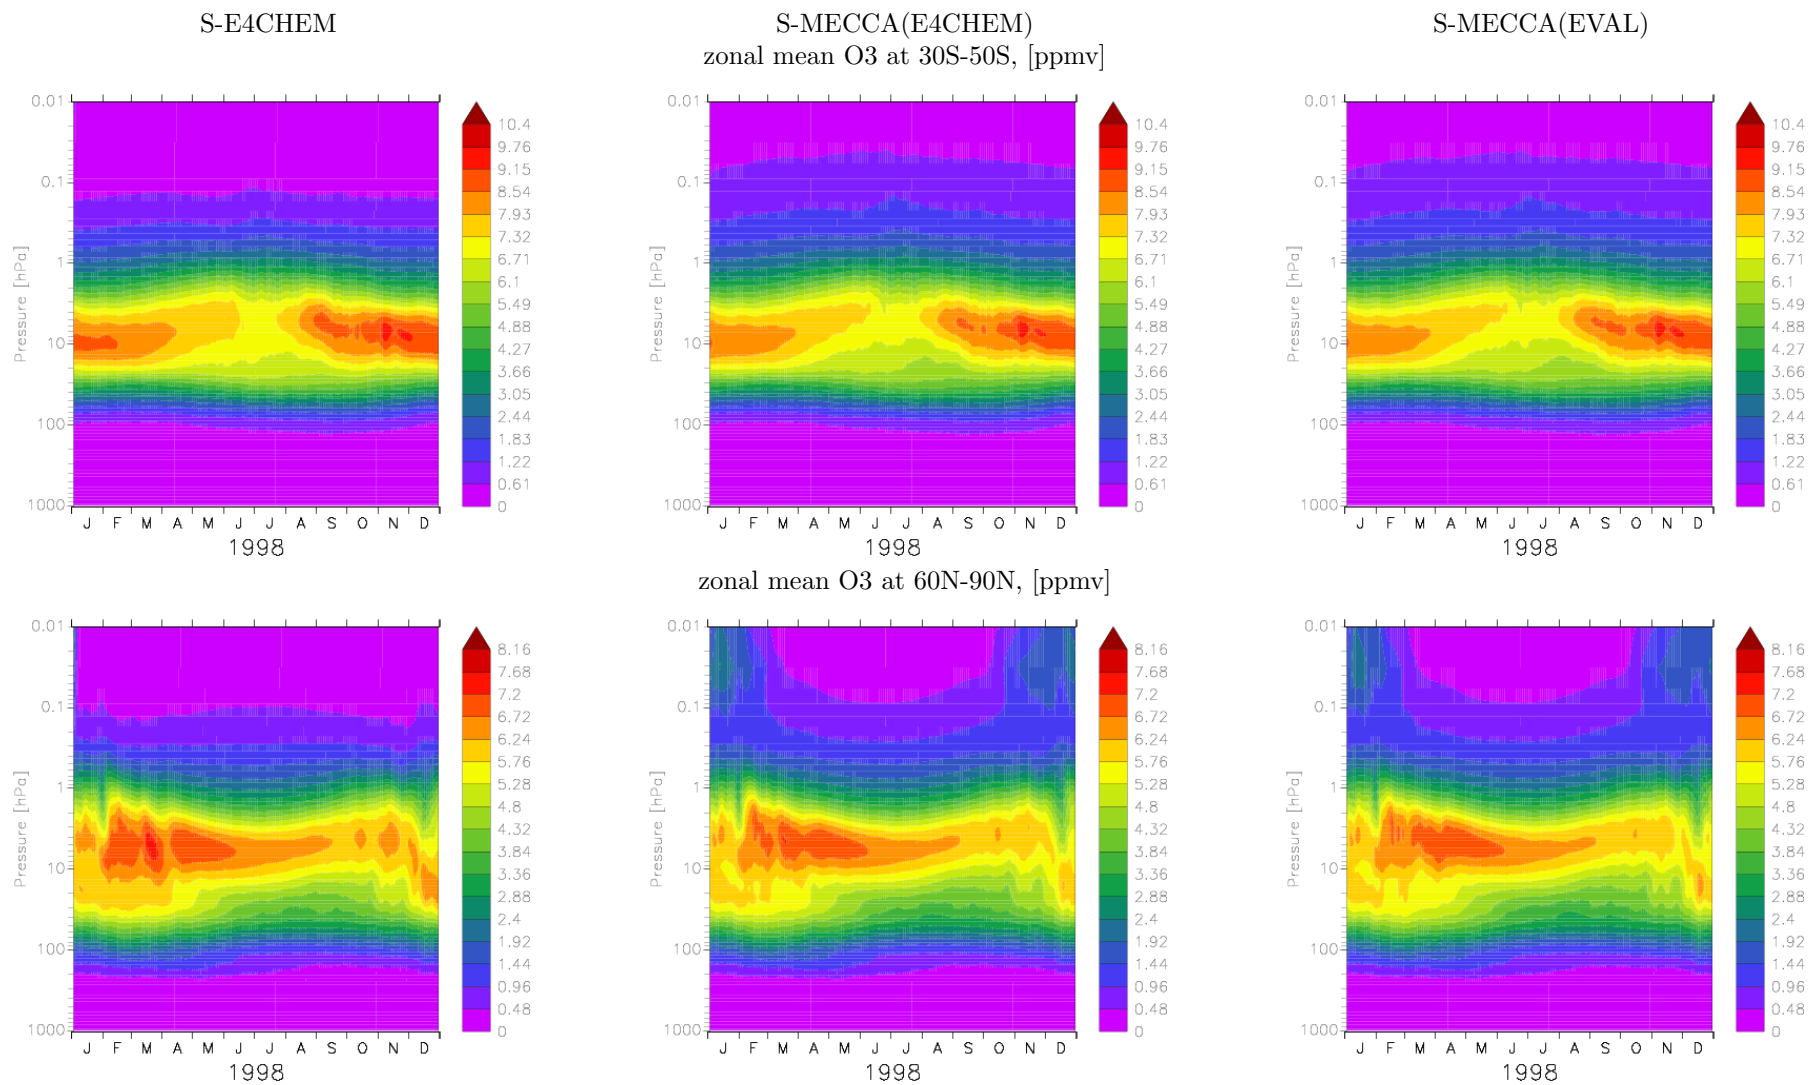

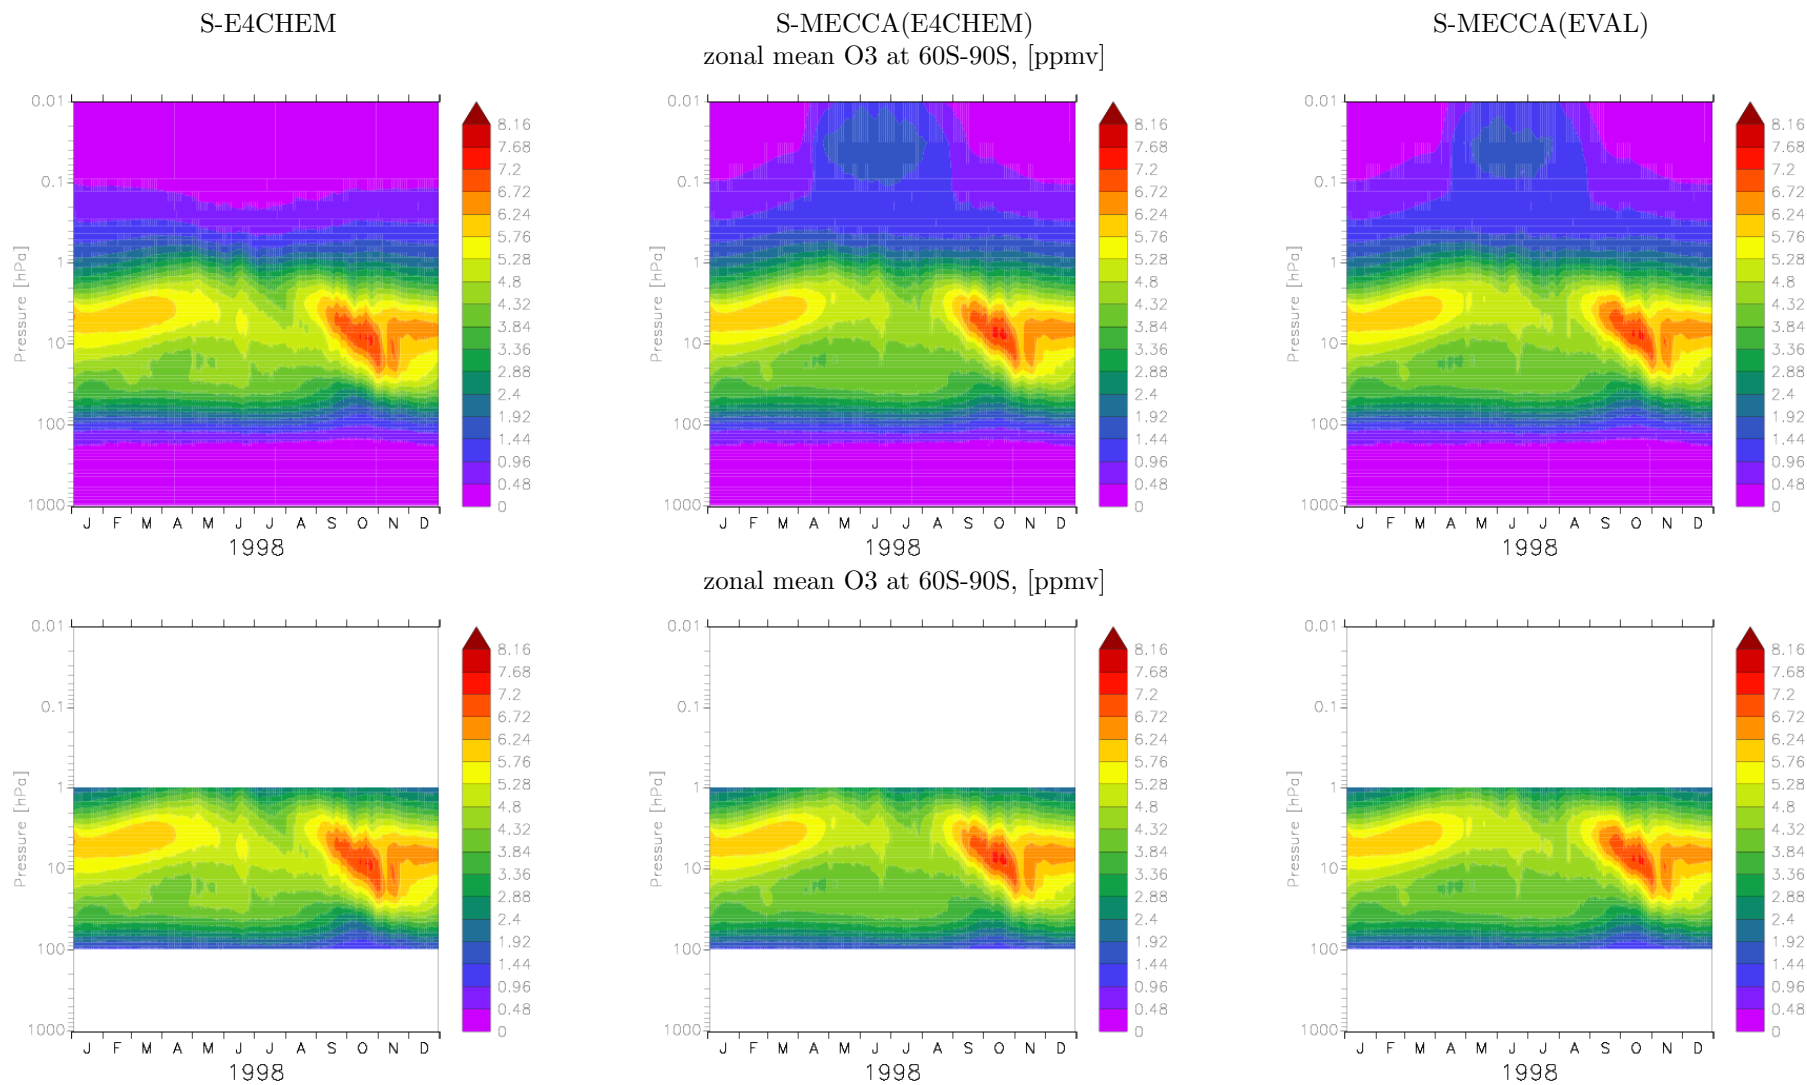



## 12 Total column ozone

S-E4CHEM

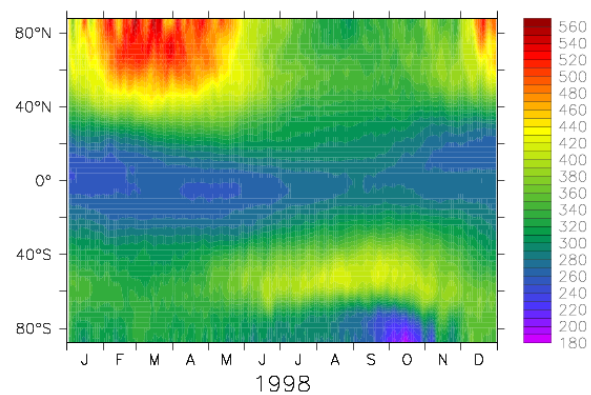

S-MECCA(E4CHEM)

zonal mean total column ozone at the surface, DU

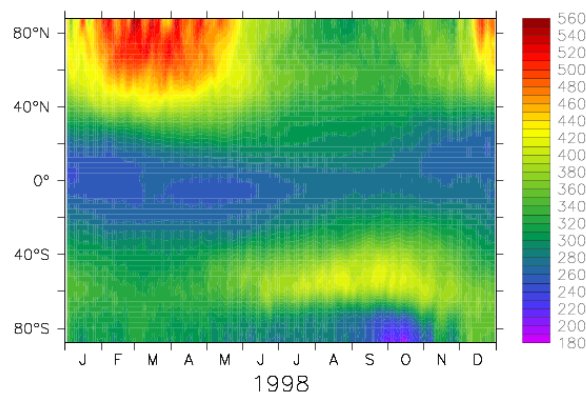

S-MECCA(EVAL)

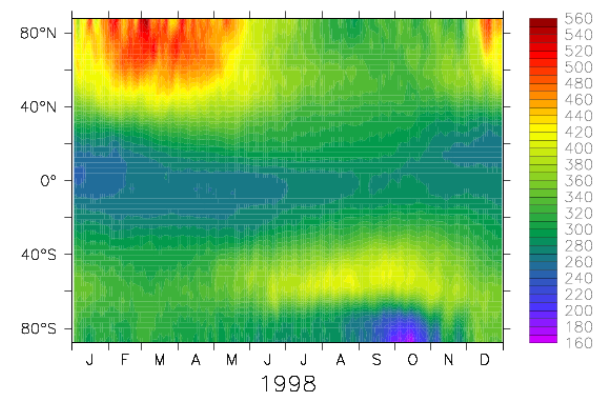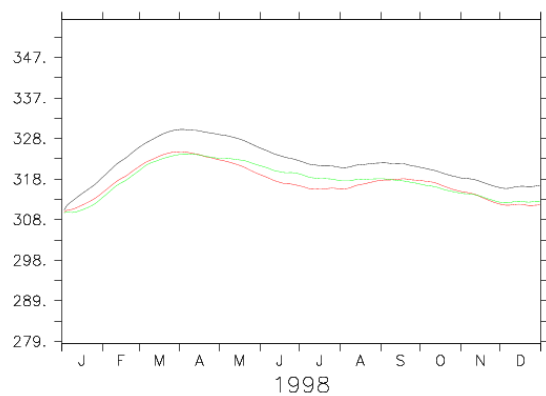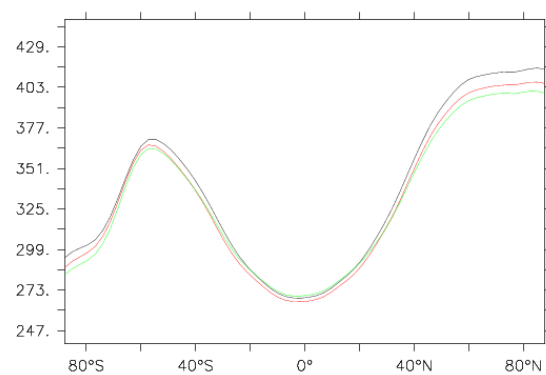

Supplement: Supplementary file 1 [file gmd-3-321-2010-supplement.zip]
