# Supplementary material for: A fast stratospheric chemistry solver: the E4CHEM submodel for the atmospheric chemistry global circulation model EMAC
Source: Copernicus journal article supplement (doi:10.5194/gmd-3-321-2010), 2010-06-22
Supplement: Supplementary file 2 [file gmd-3-321-2010-supplement.zip]

# Supplemental Material:

## Additional Figures

### Part 1: CAABA simulations

A. J. G. Baumgaertner, P. Jöckel,  
B. Steil, H. Tost & R. Sander

Correspondance to:  
A. J. G. Baumgaertner  
Air Chemistry Department  
Max Planck Institute for Chemistry  
PO Box 3060, 55020 Mainz, Germany  
`work@andreas-baumgaertner.net`

This document is part of the electronic supplement of our article “A fast stratospheric chemistry solver: The E4CHEM submodel for the atmospheric chemistry global circulation model EMAC” in Geosci. Model Dev. Disc. (2010), available at: <http://www.geosci-model-dev-discuss.net>

Date: 2009/12/15

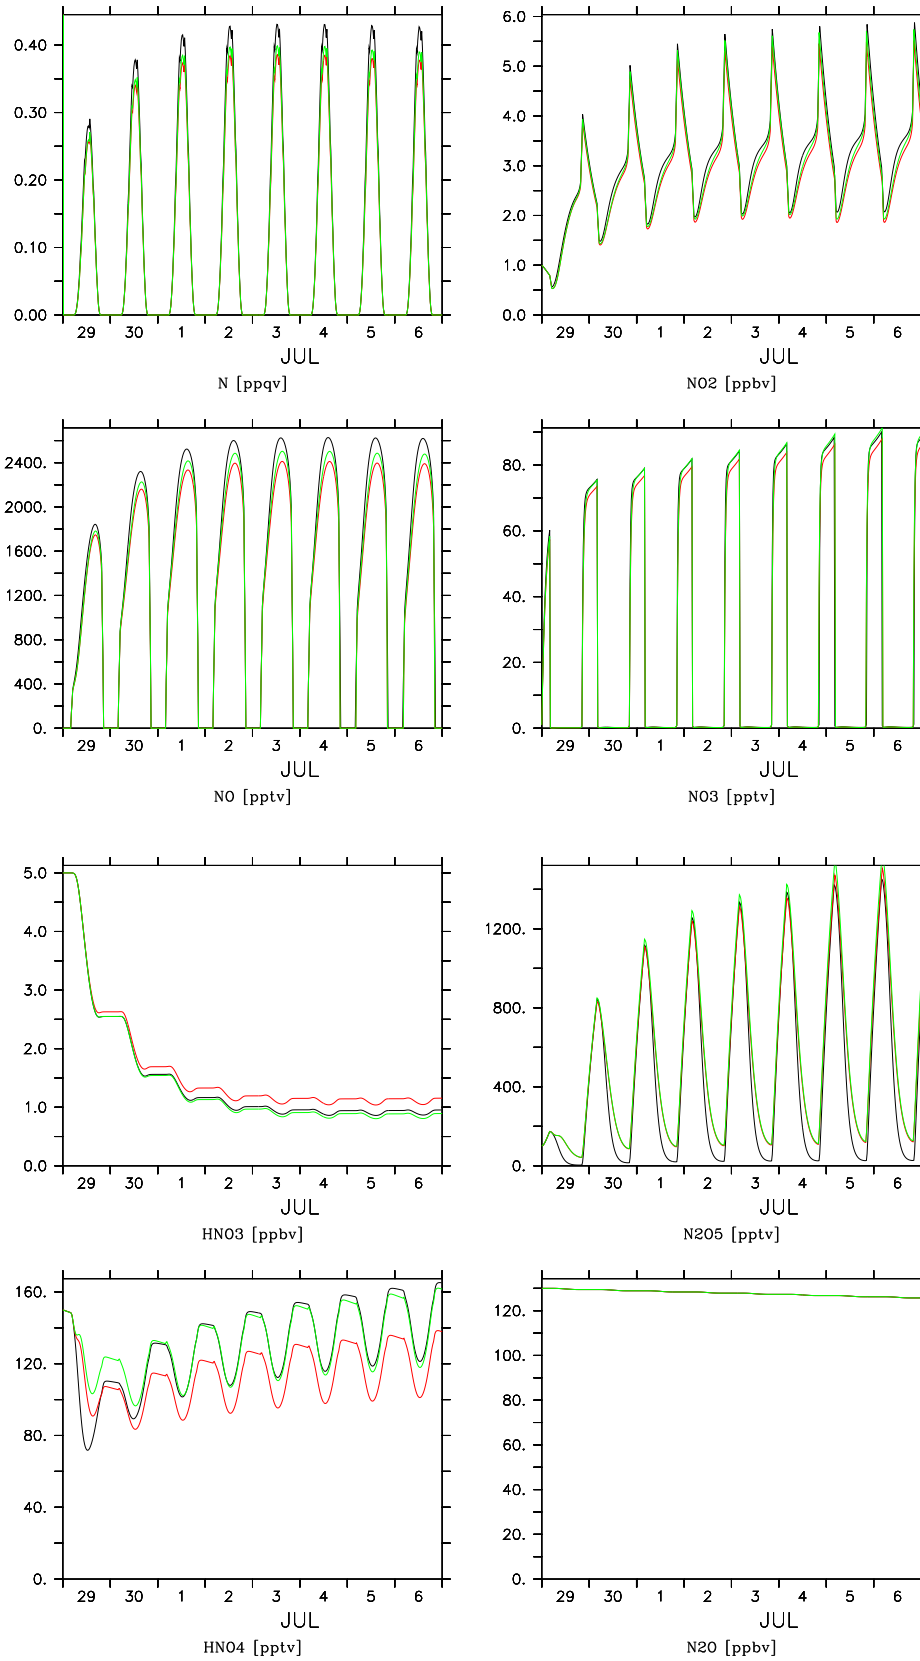

Figure 1: CAABA box model simulation results with MECCA (black), E4CHEM with original rates (red), and E4CHEM with updated rates (green).

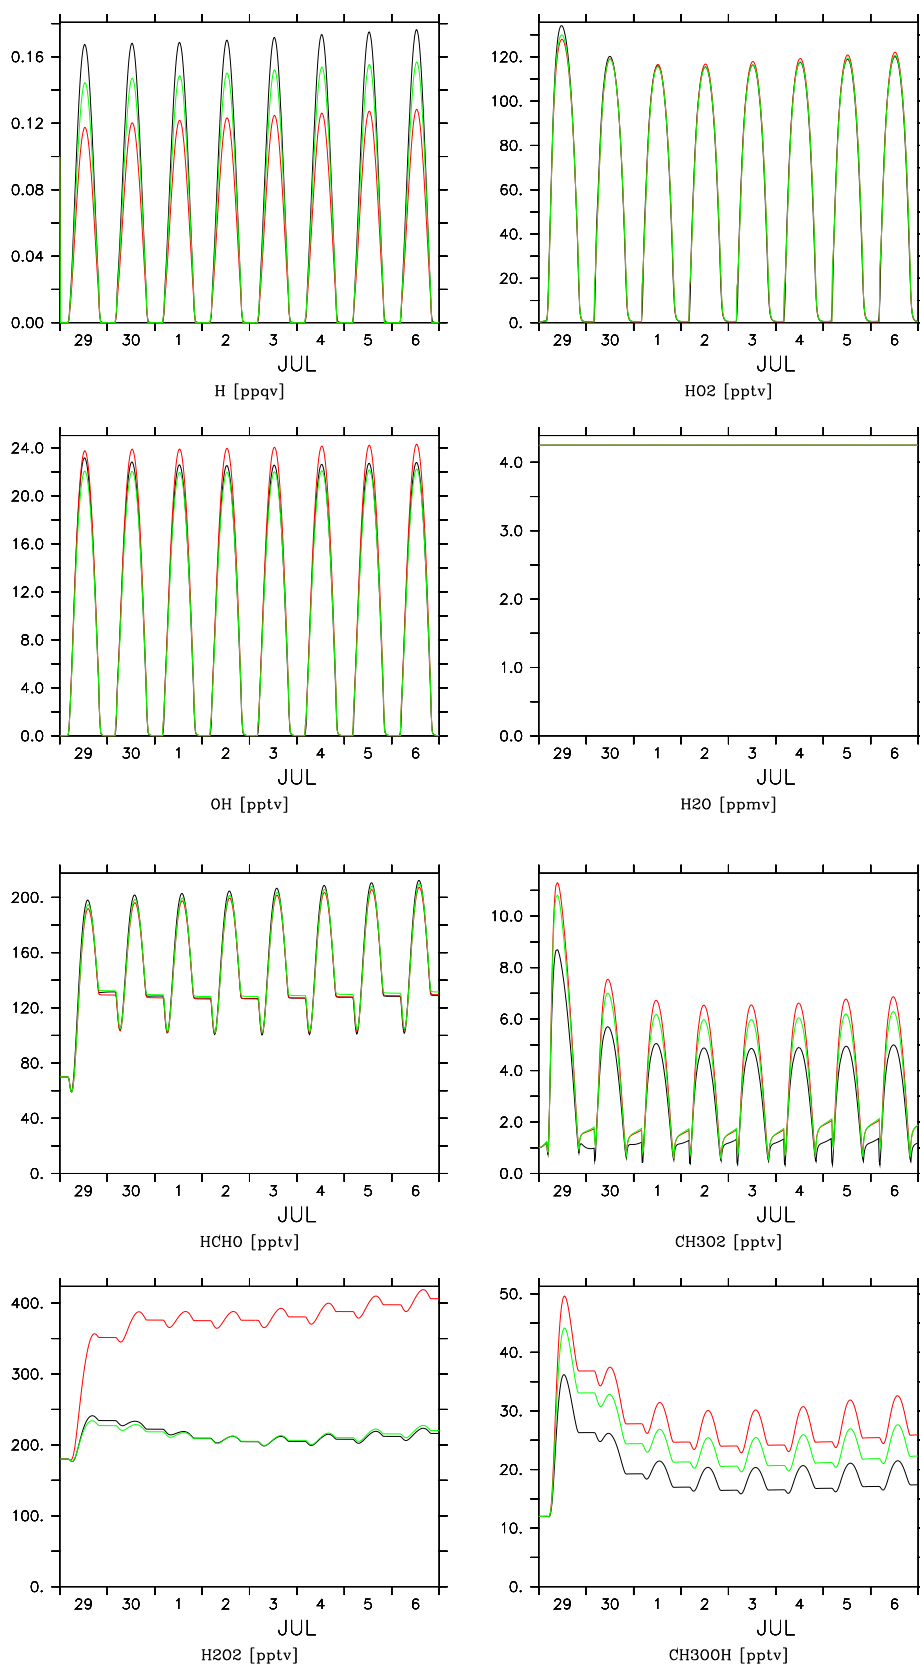

Figure 1: ... continued

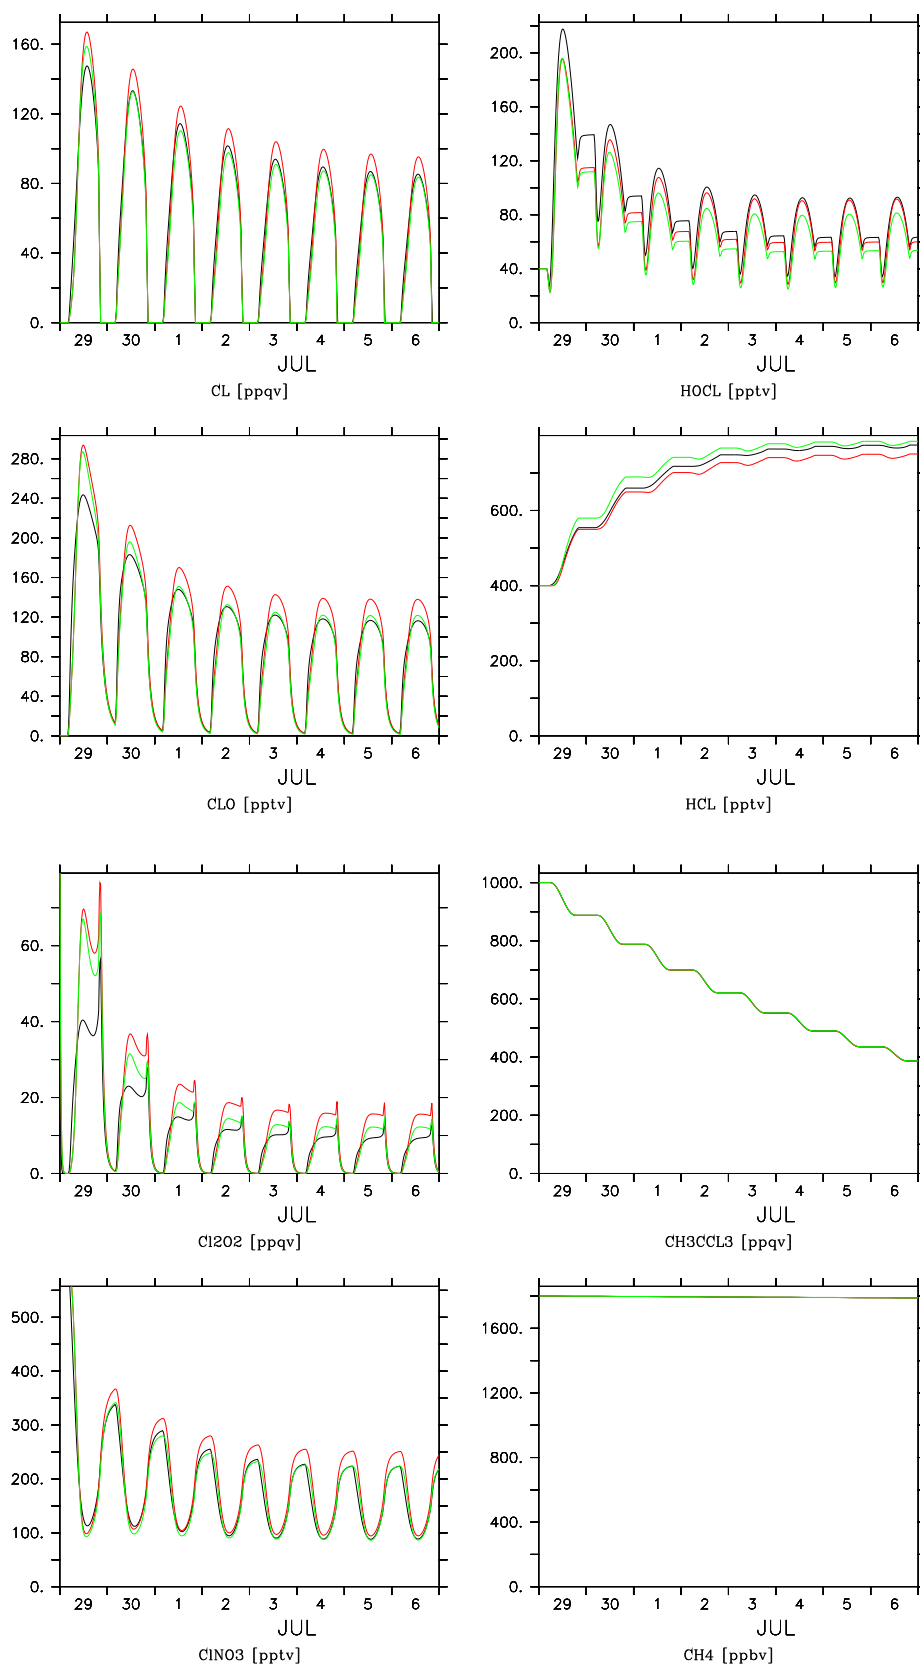

Figure 1: ... continued

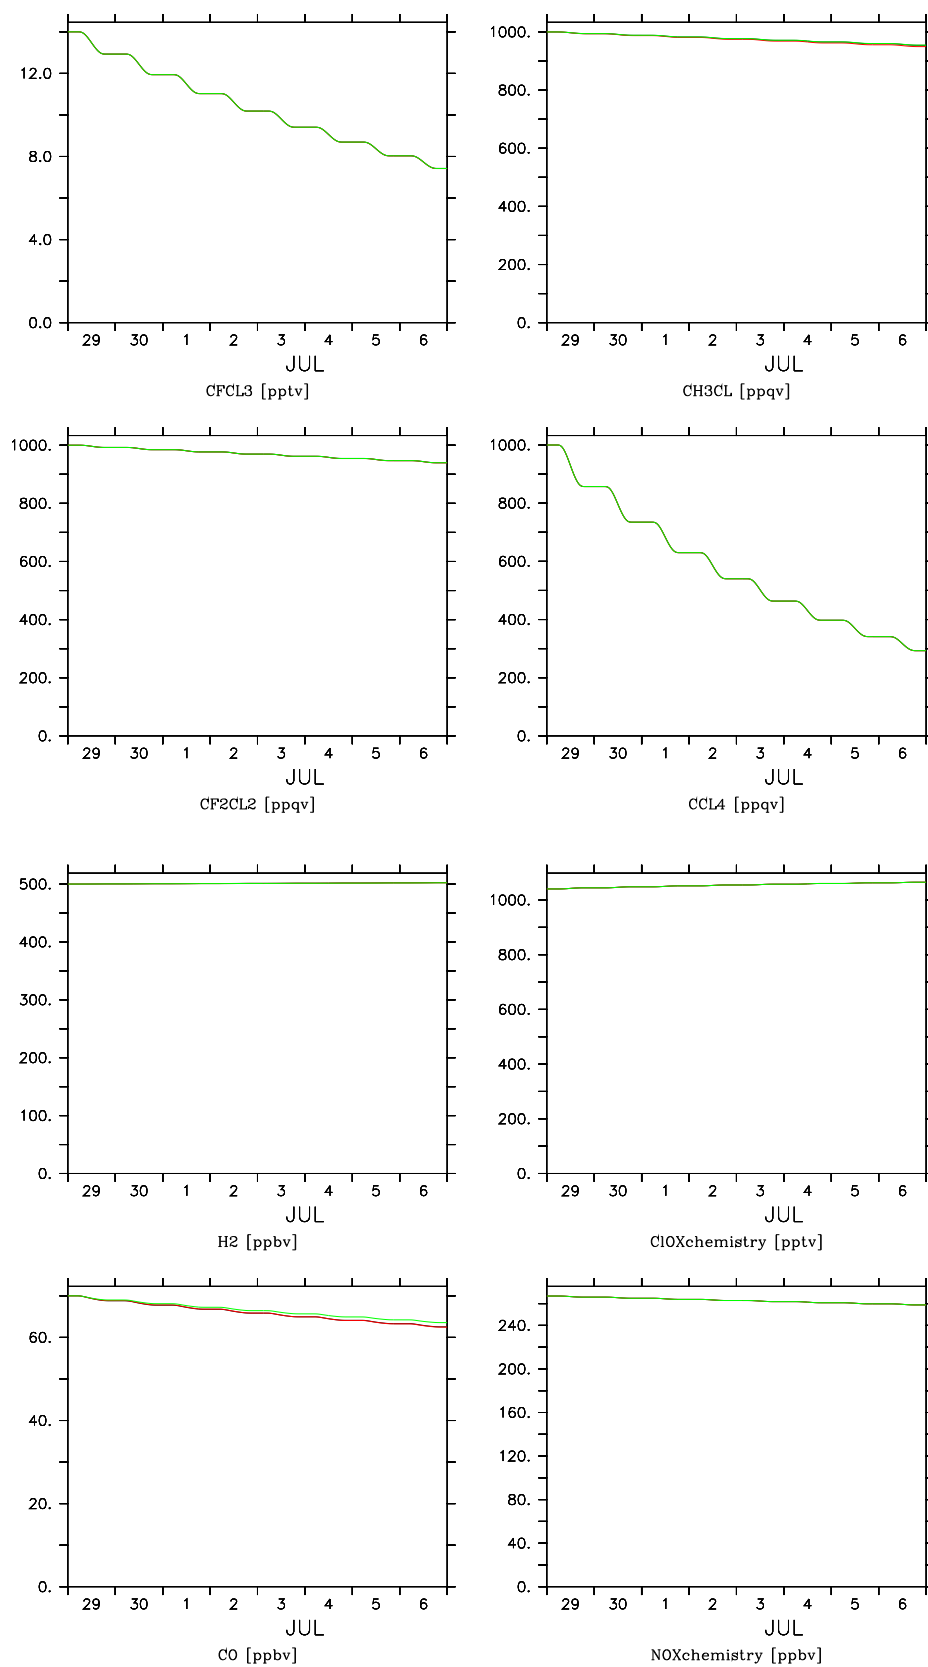

Figure 1: ... continued

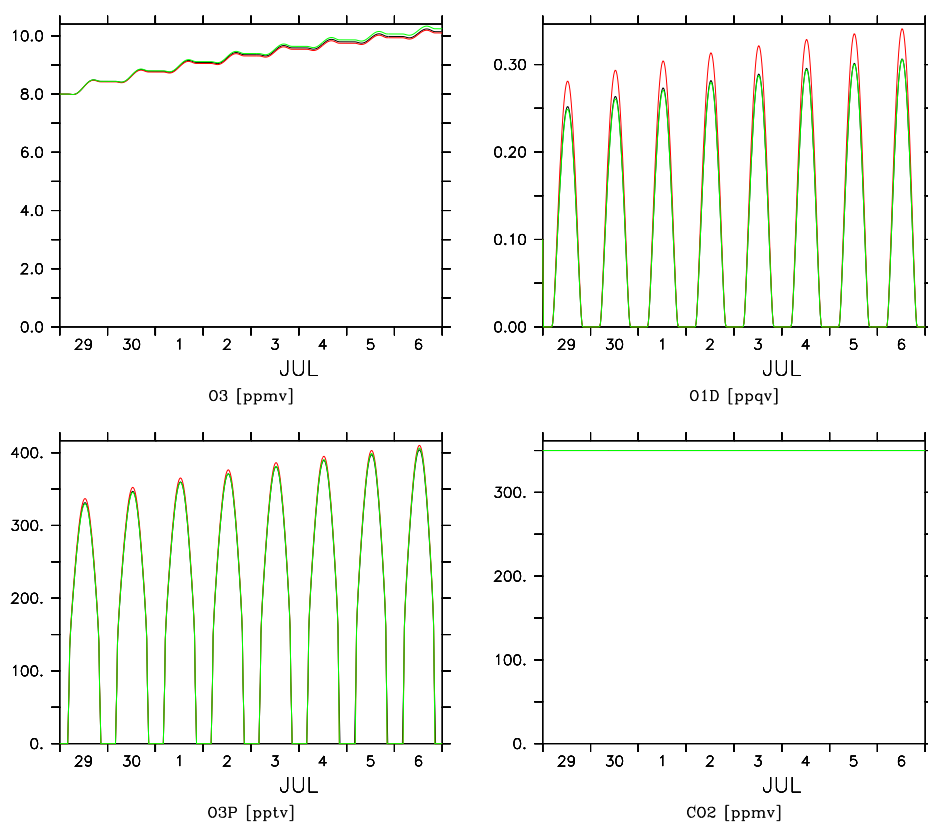

Figure 1: ... continued
